# 1 High-capacity flexible hippocampal associative and 2 episodic memory enabled by prestructured “spatial” 3 representations

4 Sarthak Chandra<sup>1†</sup>, Sugandha Sharma<sup>1†</sup>, Rishdev Chaudhuri<sup>2</sup>, and Ila Fiete<sup>1\*</sup>

5 <sup>1</sup>Department of Brain and Cognitive Sciences & McGovern Institute, MIT, Cambridge MA

6 <sup>2</sup>Center for Neuroscience, Department of Neurobiology, Physiology, and Behavior & Department of Mathematics,  
7 University of California Davis, CA

8 <sup>†</sup>these authors contributed equally to this work

9 \*fiete@mit.edu

## 10 ABSTRACT

Hippocampal circuits in the brain enable two distinct cognitive functions: construction of spatial maps for navigation and storage of sequential episodic memories. This dual role of the hippocampus remains an enduring enigma. While there have been advances in modeling the spatial representation properties of the hippocampus, we lack good models of its role in episodic memory. Here we present a neocortical-entorhinal-hippocampal network model that exhibits high-capacity general associative memory, spatial memory, and episodic memory without the memory cliff of existing neural memory models. Instead, the circuit (which we call Vector-HaSH, Vector Hippocampal Scaffolded Heteroassociative Memory) exhibits a graceful tradeoff between number of stored items and detail, achieved by factorizing content storage from the dynamics of generating error-correcting stable states. The exponentially large space avoids catastrophic forgetting. Next, we show that pre-structured representations are an essential feature for constructing episodic memory: unlike existing episodic memory models, they enable high-capacity memorization of sequences by abstracting the chaining problem into one of learning transitions within a rigid low-dimensional grid cell scaffold. Finally, we show that previously learned spatial sequences in the form of location-landmark associations can themselves be re-usably leveraged as robust scaffolds and associated with neocortical inputs for a high-fidelity one-shot memory, providing the first circuit model of the “memory palaces” used in the striking feats of memory athletes.

## 12 Introduction

13 As we navigate through life, the hippocampus weaves threads of experience into a fabric of episodic memory.  
14 Cross-linked by various contexts, this fabric allows us to revisit scenes and events from only a few cues, like Proust’s  
15 famous madeleine<sup>1</sup>. Such cue-driven recall makes memories available in ways relevant to make inferences in the  
16 present and to plan for the future. The hippocampal complex is responsible for this functionality<sup>2-5</sup>, but it is unclear  
17 exactly how the architecture and representations of the hippocampal formation and the adjoining entorhinal cortex  
18 and other cortical regions enable it.

19 The representations and dynamics in substructures of the hippocampal complex have been studied extensively<sup>6-26</sup>,  
20 and experimental findings combined with models and model testing have resulted in striking progress in our  
21 understanding of local circuit mechanisms<sup>18,27-55</sup>. These works put us in an excellent position to now build our  
22 understanding of the combined system, on how the substructures work together to subserve robust, efficient, and  
23 high-capacity associative memory storage and recall. A particularly intriguing question centers on the dual role  
24 of this structure: the hippocampus underlies both general episodic memory and spatial memory. Why are these  
25 two forms of memory co-localized? The storage of new autobiographical experiences, or episodic memory, is  
26 famously compromised with damage to the hippocampal complex<sup>56-58</sup>. Spatial memory refers to our ability to  
27 navigate and remember the layout of our physical environment. The hippocampus is populated with place cells that  
28 fire at a particular location in a particular environment and context<sup>59,60</sup>. In the entorhinal cortex, grid cells play a

29 complementary role: they generate an invariant spatial representation across environments<sup>36,61–64</sup>, in the form of  
30 triangular grid-like firing patterns<sup>61</sup>. Thus, entorhinal grid cells are hypothesized to generate a spatial coordinate  
31 system, while hippocampal cells encode specific locations. Both types of memory (episodic and spatial) can be  
32 accumulated and accessed over a lifetime without major interference, despite the small size of the hippocampus  
33 relative to cortex.

34 The dual spatial and episodic memory functions of the hippocampus might be understood by three distinct  
35 (but non-exclusive) hypotheses. The first is that spatial information content is the most critical type of memory for  
36 survival – remembering details about the locations where we found food or dangers<sup>65</sup>. In this view, the circuit is  
37 optimized for spatial memory, while episodic memory is a small augmentation of that system. The second is that the  
38 circuit is focused on and optimized for episodic memory, but that spatial coordinates (not necessarily detailed spatial  
39 information content) are merely among the most stable and useful indices into that memory<sup>66</sup>. The third hypothesis  
40 is that the highly structured memory architecture’s dynamics are equally optimized for episodic memories that  
41 may or may not contain spatial information, as well as for spatial memory. In essence, the third hypothesis is that  
42 the *abstract* low-dimensional representational architectures that might be interpreted as spatial are equally critical  
43 scaffolds for linking together (potentially entirely non-spatial) elements of an episodic memory<sup>66–73</sup>.

44 In this work, we build a new neocortical-entorhinal-hippocampal circuit model for content-addressable associative  
45 memory and extensively characterize its properties numerically and theoretically. The two critical features of this  
46 model are: 1) A factorization of memory into a structured scaffold for fixed-point dynamics powered by a completely  
47 invariant grid cell circuit (in accord with our knowledge of that circuit<sup>36,61–64</sup>) interacting in a fixed and random way  
48 with hippocampus, and a separate stage for (hetero)association with input data, and 2) forcing transition dynamics in  
49 episodic memory to be mediated by a shift operator acting on the low-dimensional latent grid states.

50 We find that this circuit excels at three kinds of memory: for individual inputs (item memory), for spatial  
51 mapping (spatial memory), and for sequences (episodic memory). One of the most interesting properties of the  
52 model is that the seemingly spatial representations of the grid cell circuit, specifically the low-dimensional and  
53 vectorial nature of the code, play a critical and distinct role even for completely non-spatial episodic memory. In  
54 other words, our model supports the third hypothesis about the co-localization of spatial and episodic memory.

55 Computationally, for each input the model creates a hash code given by the scaffold state, uses pre-structured  
56 recurrent connectivity in the scaffold to convert these hash states into fixed points for error-correction, and then uses a  
57 “strongly full-rank” property of the scaffold to enable (partial) decompression or reconstruction of the input patterns.  
58 The model also exploits the fact that grid coding states are ordered and lie in a low-dimensional space to enable  
59 efficient sequence memorization through vector transitions. For these reasons, we call our model Vector-HaSH:  
60 Vector Hippocampal Scaffolded Heteroassociative Memory. As we will see, critical to the success of Vector-HaSH in  
61 its properties of massive capacity, graceful tradeoff of content richness with number of memories without a memory  
62 cliff, non-interference between memories, lack of catastrophic forgetting, and resemblance to biological memory,  
63 is the factorization of the problems of creating dynamical fixed points (for pattern completion and stability) from  
64 content storage. Critical to its success in sequential episodic memory is the abstract low-dimensional vector updating  
65 property of the grid cell circuit, which in the spatial context is called velocity integration.

66 We will see that the highly constrained architecture, neural activations (invariant low-dimensional representation  
67 in grid cells), synaptic weights, and biologically plausible learning rules of Vector-HaSH enable memory without the  
68 full erasure (memory cliff) seen in existing neural memory models when adding inputs beyond a fixed low capacity,  
69 Fig. 1a. All code for running the model will be made freely available (upon publication) for others to make and test  
70 predictions for future experiments.

## 71 Results

### 72 HaSH architecture for hippocampal associative memory: Factorization of dynamics and content

73 Our model is based on known and inferred recurrent connectivity between entorhinal cortex and hippocampus<sup>77–80</sup>  
74 and among grid cells in the entorhinal cortex<sup>33</sup>. Processed extrahippocampal inputs enter the hippocampus (Fig. 1b,  
75 purple) via direct and non-grid entorhinal inputs (Fig. 1b, green); these inputs carry sensory information from the

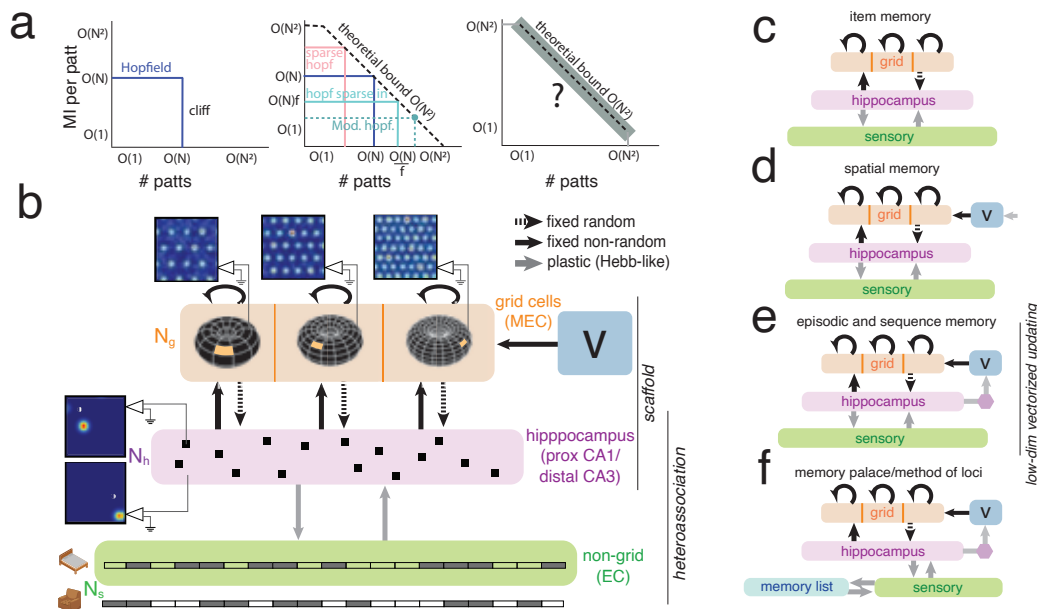

**Figure 1. The challenge of biological memory and a biologically informed architecture for general episodic and spatial memory.:** (a) *Left:* Hopfield networks exhibit a memory cliff where inputs are perfectly remembered before approximately  $N$  patterns but all memory of prior patterns is precipitously lost after approximately  $N$  input patterns. *Center:* Networks with  $N^2$  plastic synapses have a theoretical bound of  $N^2$  total memory bits<sup>74,75</sup>. All variations on Hopfield networks exhibit a memory cliff, albeit at different locations<sup>74–76</sup>, approaching the bound at only a point. Here,  $f = p \ln(p)$  where  $p$  is the sparseness of patterns in the Hopfield network with sparse inputs. *Right:* An ideal content-addressable memory would demonstrate continued information storage at or near the theoretical bound, regardless of the number of stored patterns. (b) Processed sensory inputs project from cortical and non-grid entorhinal neurons (green) into the hippocampus. The hippocampus (purple) also receives grid cell inputs via a fixed (non-plastic) random projection. Hippocampal projections back to grid cells are set once by associative learning (e.g. over development) and then held fixed, thus the grid-hippocampal circuit forms a prestructured and invariant “scaffold”. Non-grid cell-hippocampal connections are bidirectionally plastic and modifiable with associative plasticity rules. The grid circuit possesses a low-dimensional “shift mechanism” (marked  $v$  in a nod to its role in velocity-based updating in the spatial context), which shifts the grid states (phases) along each module’s two-dimensional grid representational space. (c) Circuit architecture for updating grid cell phases for high-capacity content-addressable (hetero)associative memory. (d) Circuit including shift mechanism linked to self-movement inputs for spatial memory (e) Circuit with hippocampal states driving shift mechanism to efficiently drive transitions for high-capacity episodic memory. (f) Circuit model of the memory palace mnemonic strategy, in which a previously learned spatial memory is can be repurposed as a scaffold for high-fidelity one-shot memory.

76 world, but also internally generated cognitive inputs from other brain regions<sup>66</sup>. The hippocampus also receives  
77 inputs from entorhinal grid cells (Fig. 1b, orange). It connects back out to both grid and non-grid cells.

78 The grid cell circuit consists of multiple grid modules<sup>81</sup>, comprising disjoint groups of cells. Each grid module  
79 expresses an *invariant* set of low-dimensional states regardless of task. This invariance is established in an extensive  
80 set of studies of the population states and cell-cell relationships of co-modular grid cells across behavioral conditions  
81 and states, including navigation in familiar and novel environments, across different spatial dimensions, and across  
82 sleep and wakefulness<sup>35,36,62,64</sup>. In spatial contexts, we can describe grid cell modules as coding position as a phase  
83 modulo their spatially periodic responses<sup>61,82,83</sup>. In non-spatial contexts, the states of a grid cell module remain the  
84 same but can be conceptualized as abstract representations constrained to lie on a 2-dimensional torus.

85 Connections from grid cells to hippocampus are set as random and fixed. Connections from hippocampus to grid  
86 cells are set once (e.g. over development) through associative learning, and are then held fixed. As we will see, the  
87 fixed internal grid connectivity and random fixed projections from grid to hippocampal cells are critical for many  
88 important properties of the circuit. Connections between hippocampus and non-grid inputs remain bidirectionally  
89 plastic and set by associative learning.

90 Because the grid cell states are fixed and the grid-hippocampal weights are bidirectionally fixed, we refer to  
91 the grid-hippocampal circuit as the *scaffold* of the memory network. This architecture, involving a set of fixed  
92 low-dimensional states (grid cell circuit) that is recurrently coupled through fixed high-rank projections to the  
93 hippocampus, creates a large bank of well-behaved fixed points, as we will see next. Separately, we refer to the  
94 hippocampal-non-grid cortical feedback loop as the *heteroassociative* part of the circuit. In this circuit, a separate  
95 set of connections than those generating fixed points heteroassociatively attach sensory data to the scaffold. Unlike  
96 standard associative memory models like the Hopfield network<sup>84</sup> in which the recurrent weights stabilize and  
97 associate content directly, here the two are separated: Vector-HaSH *factorizes* recurrent dynamics from content.

98 We next explore the theoretical and empirical properties of this circuit architecture and its extensions for content-  
99 addressable memory in various settings, from spatial to non-spatial memory to sequential episodic memory, Fig.  
100 1c-f.

## 101 **Generation of vast library of robust fixed points in an invariant scaffold**

102 The grid cell circuit consists of a few ( $M$ ) putatively independent grid cell modules: the population states of the  
103 neurons in each module are constrained to lie on a 2-dimensional torus. Each grid module can express just one state  
104 on the torus at a time, independent of the other modules. The  $i^{\text{th}}$  module can take one of  $K_i$  states, thus together  
105 they express  $\prod_i K_i \sim \langle K \rangle^M$  many, or exponentially many, distinct states (assuming the  $K_i$ 's are coprime). Coupling  
106 co-active grid cells from all modules to a hippocampal cell through learned bi-directional connections could turn  
107 that grid-hippocampal state into a fixed point and enable error-correction<sup>83,85</sup>. However, the hippocampus does not  
108 possess enough cells to convert each grid state into an attractor in this way.

109 In the scaffold hypothesis, grid cells project with fixed random weights – a high-rank random projection – to  
110 hippocampal cells, which threshold and rectify their inputs. The return projection is learned once through simple  
111 Hebb-like learning to reinforce the input grid cell state, then held fixed (Methods).

## 112 **Random fixed scaffold converts exponentially many grid states into exponentially many stable fixed points**

113 Remarkably, the random grid to hippocampal projections combined with associatively learned return projections in  
114 the scaffold converts *all* the exponentially many grid states (as a function of number of grid modules) into stable fixed  
115 points or attractors of the entorhinal-hippocampal circuit, Fig. 2b, for a sufficiently (but not very) large hippocampal  
116 network, Fig. 2c. Adding noise to a hippocampal state derived from any grid state, then running the dynamics of the  
117 circuit, exactly restores the correct (denoised) hippocampal state for the original grid state.

118 The required number of hippocampal cells is much smaller than the exponential set of grid states (Fig. 2d, left;  
119 SI Fig. S1): it scales only linearly with the number of modules, and therefore logarithmically with the number of  
120 grid states. It is also nearly independent of the scale (periodicity) of the grid cells for a given number of modules  
121 (Fig. 2d, right, SI Fig. S2; analytic proof in SI Sec. C.1). In sum, the number of stable states generated by the  
122 scaffold is exponential in the combined number of scaffold neurons (grid and hippocampal cells).

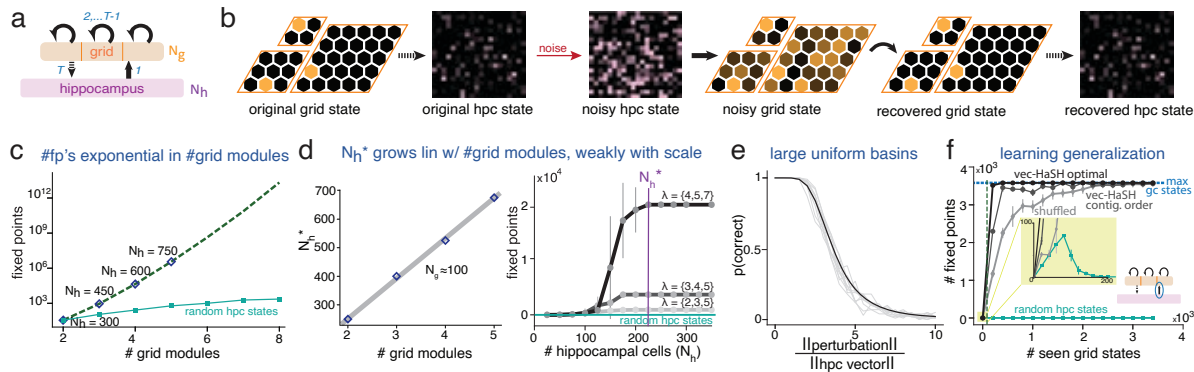

**Figure 2. Scaffold generates exponentially many fixed points with large equal-sized basins.** (a) The grid cell-hippocampal scaffold circuit, with pre-structured grid cell states, random fixed grid projections to hippocampus, and fixed return projections. Numbers indicate flow of dynamics (order of updating) in the circuit. (b) Illustration of states and dynamics in circuit. A noisy version of a hippocampal state is cleaned up in one round-trip pass through the scaffold. (c) The exponentially many coding states (as a function of grid module number)<sup>82,83</sup> are converted into exponentially many stable fixed points by the scaffold architecture for a sufficiently large number of hippocampal cells. States are defined as stable fixed points if they correct noise of magnitude 25% of the typical hippocampal state magnitude. (Grid periods for  $k$  modules are set as the first  $k$  prime numbers, number of hippocampal cells set to  $150 \times k$ ). Numerical results (diamonds) exactly coincide with analytical theory (forest green dashed curve, derivation in SI C.1); zero variance across different random initializations. Light green: Learned bi-directional grid-hippocampal connectivity (with hippocampal states selected as shuffled versions of the states set by random grid cell projections) destroys the capacity of the scaffold (also see SI Fig. S3). (d) Left: Required hippocampus size ( $N_h^*$ ) grows only linearly with grid modules, and thus only logarithmically with the number of fixed points. Thus, the number of scaffold fixed points is exponential in the network size. Right: Number of stable fixed points as a function of number of hippocampal cells (fixed points defined as in (c)). At a fixed number of modules,  $N_h^*$  is nearly independent of grid periods (gray curves), even though the number of fixed points grows with period (SI Fig. S2 and C.1 for theoretical derivation). Light green: as in (c). (e) Basin size, convexity, and uniformity: Fraction of states that return to the correct noiseless state after iteration as a function of the noise magnitude (normalized by the magnitude of the hippocampal vector) computed over 100 random noise realizations. Grey curves: five randomly selected fixed points. Black: mean over all (3600) fixed points. All basins are convex and uniformly sized. (f) Number of grid states stabilized as fixed points as a function of number of states over which the hippocampus-to-grid weights are learned: Learning from a vanishing ratio of seen states to all possible grid states ( $\sim MK_{max}/e^M$ ) turns all possible grid states (horizontal dashed blue) into fixed points – termed strong generalization. Black: Vector-HaSH with optimal sequence of seen grid phases. Dark gray: contiguous sequence of grid phases. Light gray: random sequence of grid phases. Light green: as in (c). Vertical dashed forest green: theoretical minimum number of seen grid phases for strong generalization (Fig. S4 and SI Sec. C.4 for analytical derivation).



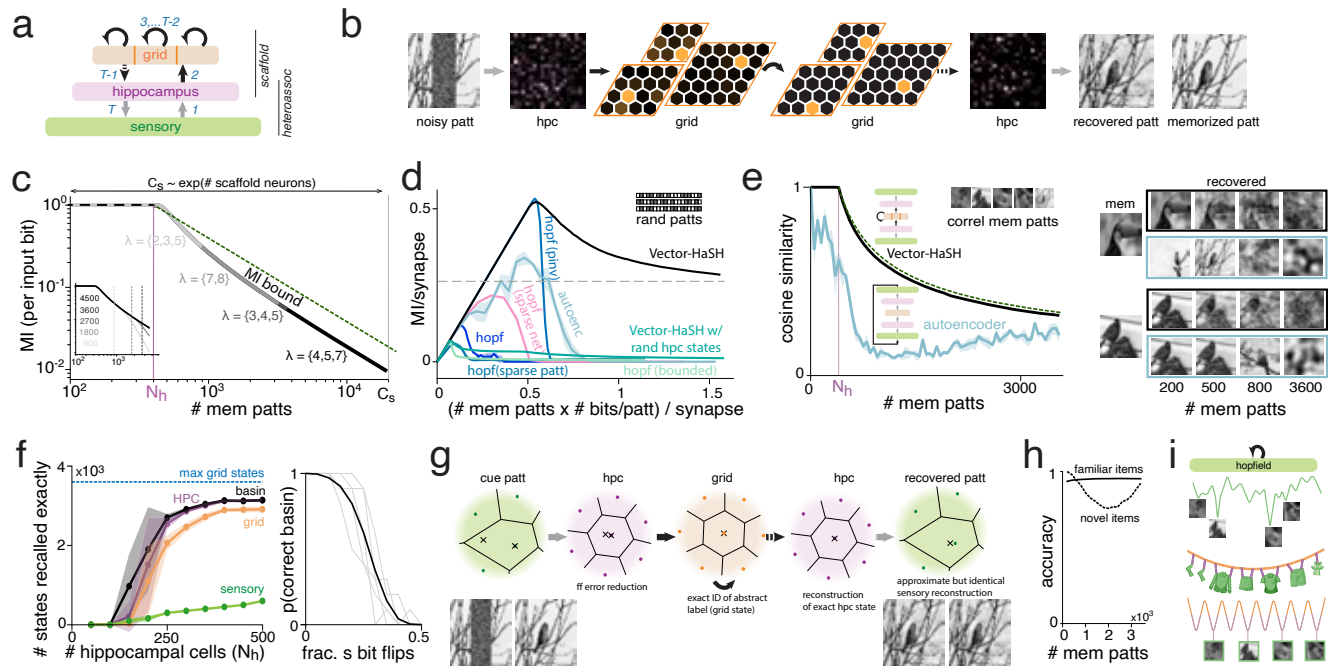

**Figure 3. High-capacity content-addressable item memory via heteroassociation with scaffold.** (a) Network architecture. Numbers indicate flow of dynamics (order of updating) in the circuit. (b) Associative content-addressable recovery: A corrupted or partial input is completed by the circuit. (c) Mutual information per input bit (MI divided by total # of input bits = MI/# patterns/bits per pattern) between memorized and recovered patterns as the number of memorized patterns is varied from 0 to the exponentially many scaffold fixed points; beyond the knee (corresponding to the location of the “memory cliff” in Hopfield networks), MI per input bit scales inversely with the number of input bits: this is the “memory continuum” of Vector-HaSH. Black dashed line: the theoretical upper bound for information storage (= # synapses / (2 × # patterns))<sup>74,75</sup>. Inset: Effect of varying the size of the sensory area ( $N_s$ ; indicated numbers), see also SI Fig. S7. (d) MI (per synapse) as a function of total number of input bits per synapse for various memory models. Most models supply zero MI per synapse after a threshold number (memory cliff). Vector-HaSH asymptotically approaches a constant MI per synapse (dashed gray line), scaling as the theoretical optimum. (e) Performance comparison of Vector-HaSH (visualized with unfolded architecture; black arrows and boxes designate predefined weights and activations) and a tail-biting autoencoder<sup>86</sup> with the same number of layers and neurons, trained end-to-end with supervised learning and unconstrained activations and weights; black arrow designates an identity weight matrix. Dashed forest green: analytical capacity result for Vector-HaSH. Right: reconstructed pattern after storage of a variable number of patterns (black outline: Vector-HaSH; blue: autoencoder). (f) Left: Number of patterns that can be memorized with perfect recovery (0-error) for grid, hippocampal, or sensory recall, respectively, when cued with sensory inputs with 2.5% noise. Most grid and hippocampal states are exactly recalled with big enough  $N_h$ . Sensory states are recalled partially, depending on position along the memory continuum, but fall in the correct basin (black curve). Right: Correct basin for recovered sensory state even for large noise in the input (shown for 500 memorized patterns; see SI Fig. S8 for the dependence on this basin structure as a function of the number of stored patterns). (g) Schematic of recovery in state space, left to right: Initial cues (bottom: masked and noiseless pattern) and where they fall in sensory space (top). The projection to hippocampus reduces noise; subsequent mapping to grid states completes a nearest-neighbor computation to the nearest grid state; this state drives the exact associated hippocampal state. The reconstructed sensory state is some distance from the memorized pattern (distance grows with number of patterns relative to  $N_h$ ). Though inexact, recovery is reliable: all cued patterns in the same basin converge to the same recovered state (bottom). (h) Simple decoder based on the mean hippocampal population firing rate permits discrimination of familiar patterns (rate distributions for familiar vs. novel patterns in SI Fig. S13). (i) An energy landscape perspective: In Hopfield networks, the width, depth, and positions of the minima depend on pattern content. In Vector-HaSH, the scaffold generates a well-behaved landscape of large equally-sized minima. Arbitrary content can be “hooked” onto the minima, in analogy with a clothesline on which any clothing may be hung.

123 We find theoretically that there are no spurious stable states, thus the entire hippocampal state space is devoted to  
124 forming large basins for the grid cell states. We also find theoretically that the basins are all convex and essentially  
125 identical in size across fixed points, SI Sec. C.2, Sec. C.3. Thus, the basins of each stable state should be uniformly  
126 and maximally large, which we confirm numerically in Fig. 2e.

127 Though remarkable, this result does not violate fundamental capacity bounds for Hopfield-like recurrent networks,  
128 according to which a network of  $\mathcal{O}(M)$  neurons and  $\mathcal{O}(M^2)$  synapses can support at most  $\mathcal{O}(M)$  user-defined points  
129 as stable states of the dynamics, or  $\mathcal{O}(M^2)$  bits of information<sup>74,75</sup>, since the fixed points are pre-determined  
130 content-free states and not user-defined. The specific structure of the pre-determined grid states, randomly projected  
131 to the hippocampus, creates well-spaced robust grid-hippocampal attractors with large even-sized basins.

132 The specific structure of the fixed weights and activations in the scaffold is critical for its function: if instead  
133 of being determined by random grid projections, the hippocampal states are set to be randomly shuffled per-state  
134 versions of these states, preserving their statistics, and the grid-to-hippocampal and return weights are bidirectionally  
135 learned to make the grid-hippocampal pattern pairs self-consistent, the scaffold capacity collapses (Fig. 2d; theory  
136 in SI C.1).

137 **Strong generalization property of scaffold** The scaffold network possesses another remarkable property dependent  
138 on grid coding, which we call strong generalization. The hippocampal-to-grid weights are set by visiting the  
139 grid states, determining the hippocampal states via the grid-to-hippocampal random projection (with thresholding),  
140 then applying Hebb-like associative learning. We find that all  $\mathcal{O}(K^M)$  grid states become stable fixed points of the  
141 iterated dynamics after learning the weights for only  $\mathcal{O}(MK_{max})$  of the states, where  $K_{max}$  is the number of states in  
142 the largest module. When  $M$  and  $K$  are large, this is a miniscule fraction of all the states that become automatically  
143 stabilized, a very strong type of generalization (Fig. 2f). We derive a theoretical proof of this strong generalization  
144 property in SI Sec. C.4. For strong generalization, the grid states visited during learning could simply be generated  
145 by traversing a small contiguous set of locations (see SI Fig. S5 for an illustration of the minimal spatial region  
146 required for learning, compared to the full extent of the grid coding space). Learning from a random subset of  
147 grid states requires seeing many more patterns before all grid states become stable fixed points – there is some  
148 generalization, but it is substantially weaker (Fig. 2f). (Certain special sets of non-contiguous locations can lead  
149 to strong generalization SI C.4, SI Fig. S5.) When grid states are replaced by fixed patterns of otherwise identical  
150 sparsity (e.g., obtained by shuffling each grid coding states), as in MESH<sup>87</sup>, there is almost no generalization:  
151 stabilizing exponentially many states requires learning from exponentially many patterns, close to a fraction of one.  
152 Theoretically, the metric or ordered (and thus indirectly, spatial) structure of the grid phase code, with learning of  
153 hippocampal-to-grid projections learned while visiting states in a metric order leads to strong generalization (proof  
154 in SI Sec. C.4).

155 The property of strong generalization is computationally useful and biologically critical: it means that the  
156 scaffold weights can be learned once, for instance from early spatial exploration within a small environment, then  
157 held fixed for the rest of the animal's life. This early and spatially restricted learning is then sufficient to provide a  
158 massive library of stable fixed points for future spatial and non-spatial memory function over the rest of the animal's  
159 life, as we will see below.

## 160 **Content-addressable item memory through heteroassociation of inputs onto scaffold**

161 A content-addressable memory must enable the storage and recall of arbitrary (user-defined) input patterns based on  
162 partial or corrupted patterns. Scaffold states are not themselves memory states because they are not user-defined.

163 Consider external inputs to the hippocampus, which arrive directly from neocortex<sup>88–90</sup> or via non-grid entorhinal  
164 cells, Fig. 3a (green). We will call these sensory inputs for short. An incoming sensory input is 'assigned' to a  
165 randomly chosen scaffold fixed point via Hebb-like one-shot learning between the input and the hippocampal state  
166 by a biologically plausible online Hebb-like implementation of the pseudoinverse rule<sup>91,92</sup><sup>1</sup>. The goal of these  
167 weight updates is self-consistency: the drive from hippocampus back to the sensory states should attempt to generate

<sup>1</sup>We show in SI Sec. D.5 that one could simply use Hebbian learning instead of an iterative or standard pseudoinverse learning, while maintaining the same asymptotic capacity, with a smaller constant pre-factor, Fig. S6

168 the same sensory pattern that activated the hippocampal state. As additional sensory inputs are received, they are  
169 assigned to other scaffold states, and the weights between sensory inputs and the hippocampus are correspondingly  
170 updated. Inputs for item memory can be associated to any scaffold state, in any order (scaffold states need not be  
171 selected in a metric sequence for e.g. item memory).

172 Memories are reconstructed from partial sensory cues as follows: these inputs drive hippocampal activity, which  
173 drives the scaffold toward a valid fixed point; sensory information is then reconstructed via the heteroassociatively  
174 learned hippocampal-to-sensory weights. Vector-HaSH thus behaves as a content addressable memory (CAM)  
175 network, Fig. 3b. Reconstructions can be done bidirectionally: If the network is cued only by sensory inputs (the  
176 initial grid state is unknown), the network reconstructs the grid state. Conversely, given only the grid state (no  
177 sensory cues), the network reconstructs the sensory data.

178 **Continued high-information associative memory via graceful item number-information tradeoff** Memory  
179 recall is perfect up to  $N_h$  memorized patterns ( $N_s$  correctly recovered bits per pattern and a mutual information of 1  
180 per input bit, where  $N_s$  is the size of the sensory input). Beyond  $N_h$  stored input patterns, the recovered information  
181 per pattern scales as the reciprocal of the number of patterns: there is a graceful tradeoff between number of stored  
182 patterns and recall richness. The mutual information (MI) per input bit between recalled patterns and memorized  
183 patterns saturates or nearly saturates the theoretical upper bound (given by the square of the number of synapses  
184 divided by twice the number of patterns), at all numbers of memorized patterns up to the number given by the  
185 exponentially many scaffold fixed points, Fig. 3c. It asymptotically scales the same way as the MI upper bound (Fig.  
186 3c, black dashed line). Pattern memorization can occur online (patterns presented once, in sequence) or offline, with  
187 no difference in recall performance.

188 **Comparison with existing memory models** We can compare the performance of Vector-HaSH with Hopfield  
189 network models of various varieties: the classical Hopfield network, those with sparse weights, and those with  
190 sparse patterns. In all these networks, when the number of memorized patterns remains below a threshold (linearly  
191 proportional to network size), they are perfectly recovered. Memorizing patterns beyond this critical number leads to  
192 loss of all patterns, including those previously memorized: the mutual information between recalled and memorized  
193 patterns drops to zero, — a memory “cliff” (Fig. 3d). Other memory models exhibit a similar cliff<sup>86,93–98</sup>. Others  
194 can store only a specific number of patterns for a fixed network architecture<sup>76</sup>.

195 In Vector-HaSH, the network continues to store finite information per input bit, until the number of stored  
196 patterns equals the exponentially large scaffold number capacity. The recovered information per synapse approaches  
197 a constant value regardless of the number of stored patterns up to the scaffold number capacity, Fig. 3d – there is no  
198 memory cliff<sup>2</sup>, and the total information in the network scales as the optimal value of  $N^2$  regardless of number of  
199 patterns, Fig. 3c (dashed line). The information recoverable per network synapse tends asymptotically to a constant  
200 value rather than zero (Fig. 3d (dashed line)). We call the constant retrievable information in Vector-HaSH and  
201 the smooth tradeoff of information per pattern with number of patterns a memory “continuum”, in contrast to the  
202 memory cliff of other CAM models<sup>87</sup>.

203 **Comparison with end-to-end trained deep networks** Vector-HaSH can be unfolded for interpretation as an  
204 autoencoder<sup>86</sup>, but a highly constrained one: the encoding in the bottleneck layer is fixed, with fixed recurrent  
205 dynamics within the layer. The weights from the bottleneck to decoder layers are fixed, and all weights are learned  
206 through biologically plausible associative rules, Fig. 3e (left). For comparison, we train an unconstrained autoencoder  
207 of the same dimensions with a tail-biting connection (identity weights from the output of the autoencoder to its inputs)  
208 to enable iterative reconstruction<sup>86</sup> (Fig. 3e (left)) via supervised learning (backprop). Strikingly, Vector-HaSH  
209 substantially outperforms this autoencoder, despite the latter’s much larger potential flexibility, Fig. 3e (right),

<sup>2</sup>Since input sensory patterns are stored via association to scaffold states, once all scaffold states have been associated with an input there are three possibilities. The first is that the memory is saturated and no further sensory patterns can be stored. The second involves selecting an existing scaffold state randomly or based on sensory overlap and rewriting the previous memory’s heteroassociative weights to accommodate the present sensory input. The third involves a gradual decay of the heteroassociative weights between sensory inputs and the scaffold, so that older memories are lost and those scaffold states are identified for reuse.



210 mirroring the significant advantage of MESH over the same autoencoder<sup>87</sup>. SI Fig. S9 shows that Vector-HaSH also  
211 outperforms both the tail-biting autoencoder and the non-iterated autoencoder when cued with noisy sensory cues.

212 In sum, the fixed attractor states in the scaffold (grid cells in Vector-HaSH) appear to provide a key inductive  
213 bias for robust high-capacity memory that learning with backpropagation on an unconstrained architecture cannot  
214 find or achieve.

215 **Mechanisms of continued high-information associative memory** When a partial or corrupted sensory state  
216 is presented to Vector-HaSH, it retrieves an item from memory. In different parts of the network, the precision of  
217 retrieval is different (Fig. 3f, left): grid and hippocampal states are recalled exactly almost always (with a threshold  
218 number of hippocampal cells). The sensory state is recalled only approximately, depending on the number of stored  
219 patterns relative to the size of the hippocampal area (the memory continuum; Fig. 3f, left, green). Though sensory  
220 reconstruction is approximate, the retrieved state is in the same Voronoi region as the memorized sensory pattern  
221 (Fig. 3f, left, black). This is true even when the fraction of error bits in the cue is large (Fig. 3f, right).

222 Unpacking the dynamics underlying these results: The projection of a noisy input onto the scaffold via the  
223 sensory-to-hippocampal weights already reduces some errors (Fig. 3b,g: input states move toward learned states,  
224 in the transition from green to pink basins). Next, the grid recurrent dynamics finds an exact grid coding state  
225 closest to the hippocampal inputs (Fig. 3g, transition from pink to orange basins). Further, this mapping is to the  
226 grid state in the correct basin (cf. Fig. 3f) even deep in the memory continuum, which we show analytically in SI  
227 Sec. D.1. Next, this grid state reconstructs an exact previously memorized hippocampal state (Fig. 3g, transition  
228 from orange to pink basin). Finally, the hippocampal to sensory states reconstruct an approximation to the sensory  
229 pattern corresponding to the hippocampal state. The *precision* of this reconstruction systematically decreases with  
230 the number of stored patterns because of interference in the reconstruction weights across patterns – this accounts  
231 for the memory continuum – but the reconstruction is *reliable*: regardless of the cue (which might be noiseless or  
232 corrupted), the reconstructed pattern is the same (Fig. 3g, transition from pink to green basin).

233 We prove that high-information associative memory is possible when the set of grid-driven hippocampal states  
234 is *strongly full rank* (SI Sec. D.2), a property satisfied if the hippocampal scaffold states: 1) are determined by  
235 random projection from grid cells and 2) involve some nonlinear transformation of the grid inputs (almost every  
236 nonlinear transformation in the space of all functions is sufficient, without fine-tuning the functional form). For  
237 instance, simple rectification with threshold is sufficient, for a wide range of activation thresholds (SI Figs. S10,S11;  
238 in contrast, a linear hippocampal layer does *not* result in strongly full rank hippocampal states, SI Fig. S12). The  
239 strong full rank property of the scaffold permits sensory inputs to be stored via association with scaffold fixed points  
240 in any order and at any location in the scaffold. We prove in SI Sec. D.2 that it guarantees perfect recall of the first  
241  $N_h$  stored states, Fig. 3f and continued high-information associative memory beyond.

## 242 High-capacity recognition memory

243 The observation that the circuit recollects the correct basin for a previously seen input, even as the detail of recall  
244 declines, suggests that the circuit might also be exploited as a vast recognition memory system. We explored whether  
245 a simple statistic of hippocampal activity might differentiate between responses to familiar and novel inputs. We  
246 found that the activity distributions in the hippocampus are different for familiar versus novel sensory inputs<sup>99</sup>.  
247 When a large (small) number of patterns have been stored in the sensory to hippocampal layer weights, the mean  
248 hippocampal activity for novel sensory patterns is larger (smaller) than the mean activity for familiar sensory patterns  
249 (Fig. S13). Thus, we classify a pattern as familiar if the activity evoked in hippocampus lies within a narrow band  
250 around the typical average activation for familiar patterns. Outside this band, we classify it as novel. We found that  
251 this simple two-threshold classifier on hippocampal activity successfully classified a large fraction of inputs, with  
252 only a few errors, Fig. 3h.

253 Conceptually, we may understand the strong performance of Vector-HaSH compared to conventional (e.g.  
254 Hopfield) autoassociative memory networks as follows: the latter perform poorly because their fixed point landscape  
255 is governed by the content of the patterns, leading to highly uneven and small basins sizes, with many spurious  
256 minima. In Vector-HaSH, the landscape is set by the scaffold, which has large and well-spaced basins, and content

257 is simply “hooked” onto these prestructured states. The analogy is with a clothesline (the scaffold), to which any  
258 clothes (sensory patterns) can be attached (via heteroassociation), Fig. 2h.

## 259 **Spatial memory and inference**

260 We now consider how this circuit performs *spatial* memory. Here, the metric or *vector* ordering of grid states, which  
261 was not necessary for pattern memory, becomes critical. When self-motion signals during spatial navigation are  
262 allowed to drive transitions between the metrically ordered grid states, Fig. 4a, we find below that the architecture  
263 and dynamics of Vector-HaSH support high-capacity life-long spatial memory without catastrophic forgetting and  
264 zero-shot spatial inference along novel paths.

265 In a novel room, we randomly initialize grid module phases, and velocity inputs to each module then update the  
266 grid phases through path integration<sup>101</sup>. Vector-HaSH learns associations between these updating grid states and  
267 spatially sparse sensory cues in the room, through the hippocampus, building up a map of the space which allows for  
268 bi-directional recall of grid states from sensory cues and vice-versa (Fig. 4a).

269 After even very sparse exploration in the room (Fig. 4c, left), Vector-HaSH is able to predict expected sensory  
270 observations when taking an entirely novel route through the room, on paths and path segments not previously taken  
271 (Fig. 4c, right). This zero-shot spatial inference ability arises from velocity integration<sup>102–104</sup>: the initial grid phases  
272 are updated based on velocity to generate accurate phases at locations even along novel paths, which can then drive  
273 reconstruction or prediction of the sensory cues associated with those phases from the past.

274 Next, we consider the spatial maps constructed by the circuit, and its ability to sequentially learn a series of  
275 different rooms, Fig. 4d. Grid cells and hippocampal cells exhibit realistic spatial tuning curves, including the  
276 spatially localized and typically single-bump tuning of place cells (Fig. 4b). For each room, Vector-HaSH learns a  
277 repeatably reliable spatial map, as assessed by testing after it has learned the room (Fig. 4e: compare the first two  
278 columns for each cell).

279 To assess sequential memory, and the extent of interference and overwriting of memories for different rooms  
280 acquired one after another, we assessed recall in all prior rooms after learning each of the 11 rooms sequentially  
281 (Figs. 4e, third column and 4f). The hippocampal and grid cell activations (maps) remain unchanged despite the  
282 subsequent acquisition of up to 10 new rooms. Notably, there is a complete absence of catastrophic forgetting without  
283 requiring replay or consolidative associative learning during recall assessments to refresh prior memories. This lack  
284 of catastrophic forgetting is due to the specific architecture and exponential scaling capacity of Vector-HaSH, in  
285 which random grid phase initializations result in maps that are well-separated in the coding space, Fig. 4g.

286 These properties correspond to observed responses in the entorhinal-hippocampal circuit, including the similarity  
287 of responses for repeated visits to the same room and orthogonal representation of different rooms, Fig. 4h-i.  
288 Additional properties of the hippocampal response, including the distribution of probabilities that a hippocampal cell  
289 has a field in multiple rooms, matches experimental data, Fig. 4j.

## 290 **High-capacity sequence scaffold via vector updating of grid states**

291 Sequence memory is typically modeled with asymmetric Hopfield networks<sup>105–107</sup>, resulting in similar capacity  
292 limitations as standard Hopfield networks<sup>74,86,108</sup>. Remarkably, it is possible to construct a massive sequence  
293 memory in Vector-HaSH in a similar way as item memory: by factorizing the problem into a high-capacity abstract  
294 scaffold sequence then affixing content via heteroassociation. We first explore how to construct these high-capacity  
295 sequence scaffolds.

296 Memory networks perform poorly when user-defined patterns determine the attractor states (Fig. 2e-f). The  
297 equivalent problem in sequence memory is when user-defined patterns determine and drive the next user-defined  
298 pattern: a recurrent Hopfield-like auto-associative hippocampal network with asymmetric weights quickly (within  
299  $\sim 50$  steps) results in failure to accurately reconstruct the next step, Fig. 5a.

300 We reasoned that coupling hippocampus recurrently with the grid cell modules in the same way as the scaffold  
301 network might support high-capacity sequence reproduction, by denoising and pattern-completing otherwise  
302 inaccurate next-step patterns. Doing so roughly doubled the sequence capacity of the circuit (to  $\sim 100$  steps), but  
303 did not fundamentally alter the scaling of capacity with network size, Fig. 2b.

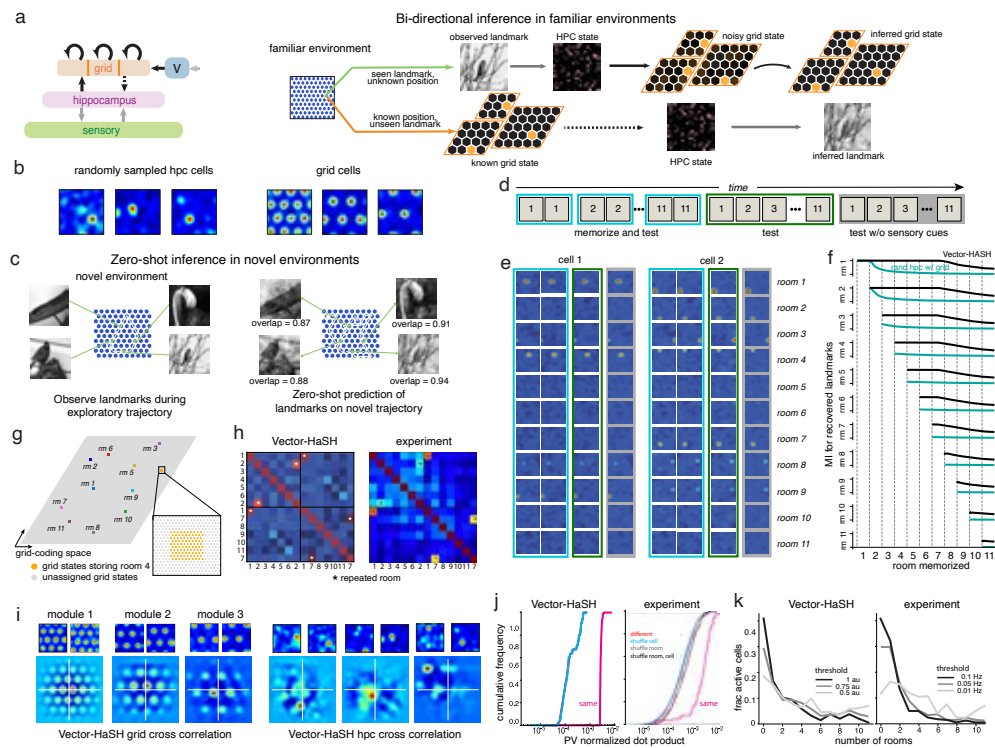

**Figure 4. High-capacity spatial memory, spatial inference, and lifelong learning of environments without catastrophic forgetting.** (a) *Left*: Vector-HaSH with a path-integration mechanism for velocity-driven shifts in grid phase. *Right*: Vector-HaSH performs bidirectional spatial inference of position (internal grid states) from sensory cues, and predicts sensory landmarks given a grid state, after simple associative-like learning in an environment. (b) Randomly sampled hippocampal and grid cell tuning in one environment. (c) *Left*: First-time traversal of an environment along only the shown trajectory, accompanied by associative learning over the trajectory. *Right*: Vector-HaSH accurately predicts all landmarks during traversal of an entirely novel path from one of the landmarks, a form of zero-shot inference. For realism, we show the model 596 other patterns (mimicking memorization of different environments) before it sees these 4 landmarks. This results in approximate sensory recovery as the model is in the memory continuum regime. (d) Sequential learning protocol for 11 rooms: Vector-HaSH is steered along a random trajectory in room 1, then tested on a different random trajectory in the same room. During memorization, there is a landmark at each location of every room. Rooms 1 through 11 are memorized in sequence without revisiting prior rooms. During testing, only the first landmark in a room is visible, the rest must be predicted. At the end, the 11 rooms are tested again, then re-tested in the "dark" in each of the 11 rooms. (e) Spatial tuning of two hippocampal cells, across rooms and across learning and all three testing conditions. (f) Sequential recall curves for map  $i$  after learning maps  $1 \dots i - 1$ : there is no interference with or catastrophic forgetting of previously learned maps in Vector-HaSH and a baseline model consisting of random sparse hippocampal states, similar to the baseline considered in Figs. 2 and 3. (g) Random assignment of the starting grid states in across the vast grid coding space results (gray diamond represents the set of all possible grid states across modules – the side-length of the diamond is the exponentially large unique coding range per dimension of the grid code, across modules) in non-overlapping grid representations and the lack of catastrophic forgetting. (h) Hippocampal population activity similarity matrix across rooms (including repeated exposures to some rooms) from Vector-HaSH (left) and experiments<sup>100</sup> (right). (i) *Left*: Top: spatial maps of a grid cell from each of three modules across a pair of rooms (rooms 8,9), and bottom: cross-correlation of that cell's response across rooms. The modules exhibit differential shifts in phase. *Right*: Across-room cross-correlations of three hippocampal cells. (j) Hippocampal representation similarity for same versus different rooms and shuffle controls for Vector-HaSH and experiments: representations of different rooms are as orthogonal as the shuffles for both. (k) Distribution of number of hippocampal cells active in  $R$  rooms as a function of  $R$ , for Vector-HaSH and experiments. In both, most cells were active in only a few rooms.

304 Next, we reasoned that learning an abstract sequence of scaffold states rather than user-defined states in the  
305 full spirit of a scaffold network might be the solution. We tested the performance of learning transitions from one  
306 abstract grid state to the next, using the projections from hippocampus to grid cells to cue the next grid state, with the  
307 full benefit of the scaffold architecture. The sequence capacity remained qualitatively similar to Hopfield networks,  
308 Fig. 5b, with failure within  $\sim 30$  steps. This is possibly because even abstract grid states are specific large activity  
309 patterns, which the previous state must sufficiently specify to reconstruct. This failure and hypothesized reason gave  
310 us the critical insight that learning the *input to the velocity shift mechanism*, which requires specifying merely a  
311 2-dimensional vector to specify the next grid state given the current one, would minimize the information, would  
312 potentially alleviate the capacity limitation for sequence reconstruction.

313 We therefore used the previous grid state to cue the next grid state, but via the drastic dimensionality and  
314 complexity reduction of the velocity-shift mechanism: the previous grid state was used to specify a 2-dimensional  
315 velocity that signals where to move in the grid coding space to generate the next grid state. We built these associations  
316 via a simple feedforward network (MLP), Fig. 5a (top) that associated the previous grid state, via the hippocampus,  
317 with a 2-dimensional velocity vector. This architecture resulted in the accurate reconstruction of scaffold sequences  
318 of  $1.4 \times 10^4$  grid states, using the same (small) number of cells in the scaffold network as before, Fig. 5a (left).

319 In other words, recalling a long abstract sequence of grid states can be achieved by solving the much simpler  
320 task of recalling a sequence of simple abstract two-dimensional vectors, each of which points from one state to  
321 the next in the grid coding space. This enables much longer sequence reconstruction because the information the  
322 network must recall for each step in the sequence is a mere two-dimensional vector, not the much larger grid pattern  
323 state, Fig. 6g. Consistent with this, when we parametrically vary the amount of information the network must recall  
324 at each step to arrive at the next, by increasing the range of possible 2D vector lengths to be recalled, the fraction  
325 of recalled sequence length decreases gradually (Fig. 5e; theoretically expected scaling, in which sequence length  
326 decreases inversely with the number of bits required to specify the next step, is shown in blue). Thus, constraining  
327 the sequence recall dynamics to a low-dimensional manifold where only low-dimensional velocity tangent vectors  
328 rather than the manifold states themselves must be reconstructed, results in vast increases in sequence length.

329 Quantitatively, we can take a statistical approach and assess how well the circuit can recall random velocity  
330 (shift) vectors assigned to each grid state, Fig. 5c. The circuit memorizes and perfectly recalls sequences of length  
331  $\sim 1.5 \times 10^5$  with a scaffold consisting of  $N_h = 500$  and  $N_g = 275$  grid cells of periods 5, 9 and 13 (and hence a total  
332 of  $\sim 3.4 \times 10^5$  total scaffold states); longer sequences are reproduced with modest decreases in recall performance.  
333 The dependence on the number of hippocampal cells is again smaller than logarithmic, similar to scalings for item  
334 memory, Fig. 5d (left), and the dependence on the number of units needed to learn the dimension-reducing mapping  
335 from state to velocity vectors is linear, Fig. 5d (right).

336 Given that the velocity transitions are 2-dimensional, we can plot the grid and hippocampal states as a function  
337 of these 2-dimensional transitions (which may or may not correspond to physical 2-dimensional space), and as  
338 expected given the invariance of grid modules, we obtain periodic grid responses in this space, Fig. 5f; hippocampal  
339 cells exhibit more-sparse and more-localized tuning relative to grid cells, Fig. 5g.

340 In sum, the velocity shift mechanism of the grid cell integrator networks enables memorization of exponentially  
341 large cumulative-length sequences of abstract grid states, relative to network size. Remarkably, therefore, the  
342 path integrability of the grid cell code can support not only highly efficient spatial inference and mapping but  
343 also sequence memory, even if the sequences do not involve physical navigation in real spaces. This defines a  
344 high-capacity abstract sequence scaffold.

## 345 Episodic memory

346 Just as high-capacity item memory was supported by the factorization of dynamics and content into a fixed-point  
347 scaffold and heteroassociation, Vector-HaSH supports high-capacity episodic memory by factorization into a  
348 sequence scaffold (above) and heteroassociation. As before, abstract grid cell and hippocampal scaffold states are  
349 heteroassociatively linked to sensory inputs during a temporally unfolding event.

350 This temporal unfolding through scaffold states can occur through next-step velocity recall based on hippocampal  
351 states (as seen in Fig. 5); however in this case the total sequence capacity is limited by the number of MLP units



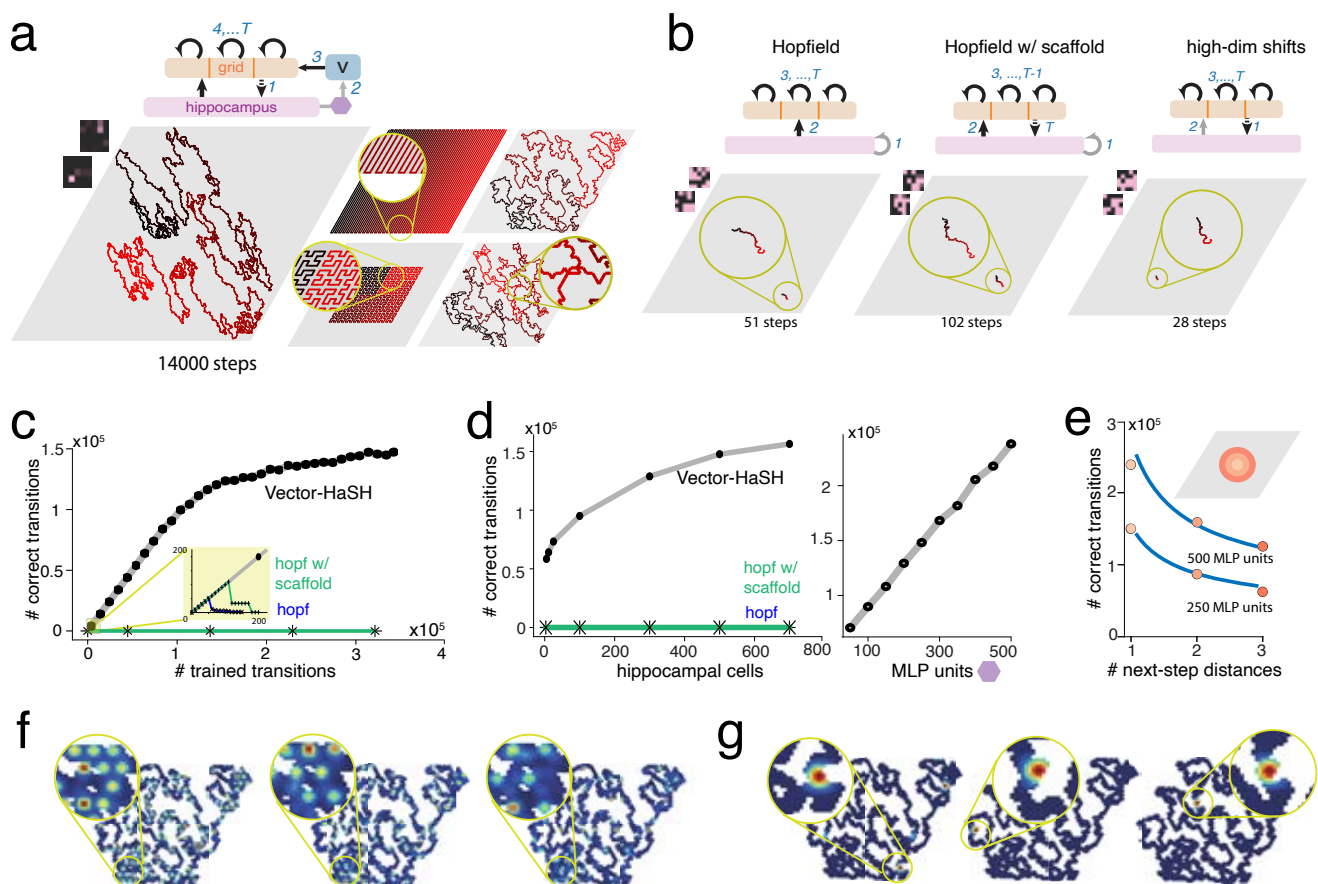

**Figure 5. High-capacity scaffold for sequences via low-dimensional velocity update mechanism in grid cells**

(a) Architecture and performance of the Vector-HaSH sequence scaffold, where transitions of grid states are driven by hippocampus via the two-dimensional grid cell velocity shift mechanism<sup>33,109</sup>. Hippocampal states are converted to velocity states by a small feedforward network (MLP,  $N_M=250$ ), violet. Left to right: Recall of a self-avoiding random walk (Lévy flight), a hairpin curve sequence that spans the entire grid coding space, a Hilbert space-filling curve that spans every point in a subset of the grid coding space, and a uniform self-avoiding random walk (in the first, parameters are as in (b); in the last three,  $\lambda = [3, 4, 5]$  with a 3600 sized state space). (b) Architectures and recall performance of hippocampus as an asymmetric Hopfield network (left), as an asymmetric Hopfield network assisted by the scaffold (center), and of the whole scaffold network with hippocampal-grid cell connections driving transitions from one grid cell state to the next (right). In all cases, the network readout is visualized by the grid state (a  $585 \times 585$  state space,  $\lambda = [5, 9, 13]$ ) and the asymmetric Hopfield network is constructed on  $N_h = 500$  nodes. (c) Left: Each point in grid coding space is assigned a random shift to link it to the next step. Vector-HaSH successfully recalls large sequences while the Hopfield baselines fail to do so. (d) Left: the recalled sequence length increases exponentially with the number of hippocampal cells, when trained on all  $585 \times 585$  random shifts. Right: The recalled sequence length increases exponentially with the size of the MLP that maps hippocampal states to a 2-dimensional velocity vector, when trained on all  $585 \times 585$  random shifts. (e) Increasing the information load of next-state generation by increasing the range of potential shift step-sizes results in reduced performance. Blue curves: performance declines as the log of the number of distinct possible shift vectors. (f-g) Sample grid and hippocampal cell tuning in the abstract 2D space defined by the grid velocities. This space is abstract: it can, but need not, correspond to physical space.



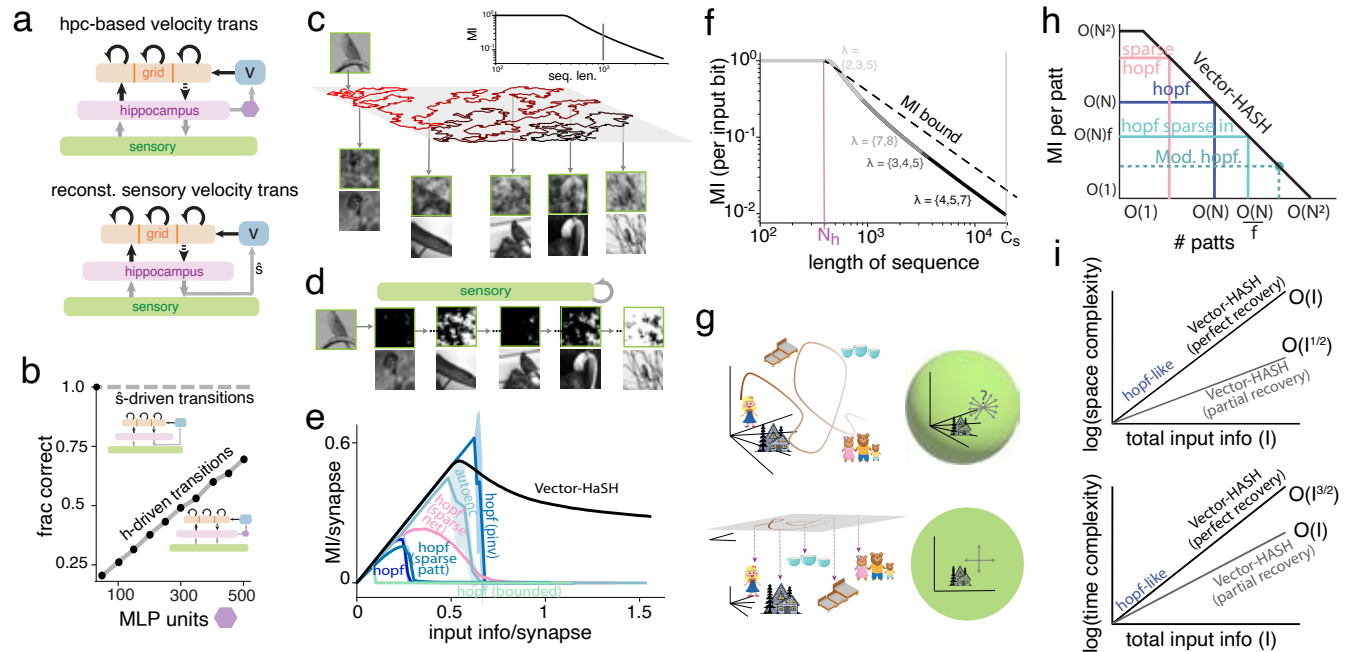

**Figure 6. High-capacity episodic (sequence) memory via heteroassociation with sequence scaffold.**

(a) Architecture of Vector-HaSH for episodic memory. *Top*: Hippocampal states determine a 2-dimensional shift vector  $\vec{v}$  for grid cells, via a decoding network (3-layered MLP, purple hexagon). *Bottom*: Alternatively, the reconstructed sensory state ( $\hat{s}$ ) determines the 2-dimensional shift vector  $\vec{v}$  (this resembles route learning, SI Fig. S14). (b) The accuracy of hippocampus-driven shifts depends on the size of the decoding network (MLP); the accuracy of sensory recall-based shifts can be consistently high because of the size of the sensory network. Because shifts are learned from the recalled sensory states rather than true sensory states, and sensory recall is reliable even when inaccurate (Fig. 3g), the shifts remain accurate deep into the memory continuum. The fraction of correct shifts is computed over learning a mapping from *all* scaffold states to random shifts, as in Fig. 5d. (c-d) Example recalled trajectory and sensory states in Vector-HaSH (c) and an asymmetric Hopfield network with the same number of synapses (d) for *bw-mini-imagenet* sensory inputs (see Methods; periods [3,4,5],  $N_g=50, N_h=400, N_s=3600$  for Vector-HaSH, and  $N_s=3600$  for Hopfield). (e) MI (per input bit) between the stored and recalled next-step sensory states as a function of episode (sequence) length when storing episodic memories, across models. (Sensory states are random binary patterns.) Vector-HaSH asymptotically approaches a constant amount of information per input bit. (f) MI between stored and recalled sensory states in Vector-HaSH as a function of sequence length (total number of stored memories), similar to the item memory curve of Fig. 3c. (g) In conventional sequence memory models, the recalled content of one item must be used to reconstruct the entire content of the next item. Vector-HaSH instead requires one item to specify or reconstruct a mere 2-dimensional vector, a task requiring far less information to be stored in the recurrent synapses. (h) As seen in (f) and Fig. 3c, Vector-HaSH thus achieves the memory continuum desired in Fig. 1a. (i) The space-complexity of storage and time-complexity of recall: *Top*: When perfectly recovering all stored patterns (when  $\# \text{ patts} \leq N_h = N_s$ ), the storage space complexity of Vector-HaSH scales the same way as Hopfield models. When storing a larger number of patterns (when  $\# \text{ patts} = N_s = C_s \gg N_h$ ), the space complexity of Vector-HaSH scales much more slowly. *Bottom*: The time-complexity of recall in Vector-HaSH scales similarly to Hopfield models for perfect recovery of a small number of patterns, but the scaling of time-complexity is much lower for partial recovery of a large number of patterns.

352 (Figs. 5d, 6b). We hypothesize an additional architecture wherein the next-step velocity recall is based on the  
353 recalled sensory inputs (Fig. 6a bottom, SI Fig. S14). In this case, all next-step transitions can be recalled due to  
354 the large number of sensory cells (Fig. 6b, proof in SI Sec. D.6). Note that, as earlier, the synaptic weights storing  
355 sensory information continues to be completely independent of the weights storing scaffold states

356 The heteroassociation part of the sequence scaffold is the same as heteroassociation for individual item memory,  
357 Fig. 6a, including one-shot learning via biologically plausible rules, robust recall of arbitrary inputs, and graceful  
358 memory degradation with increasingly many stored inputs. As in Fig. 3g, internal hippocampal states are computed  
359 with high fidelity throughout the memory continuum, while heteroassociative sensory recall fidelity degrades  
360 with sequence length Fig. 6f. Because sequence recall at each step is based on the (accurately reconstructed)  
361 previous hippocampal state, there is no degradation over time in the identity of the sensory state at each point in the  
362 sequence, Fig. 6c. The cumulative amount of sensory information recovered by the network during sequence recall  
363 asymptotically approaches a constant, Fig. 6e, as in item memory, Fig. 3f. For episodic memories with content that  
364 is not explicitly spatial, the sequential trajectory in the grid-hippocampal scaffold can be arbitrarily chosen — in our  
365 numerical simulations examining the maximal extent of sequential memory in Vector-HaSH (Figs. 6e-f), we choose  
366 a space-filling “hairpin” trajectory in scaffold space.

367 Thus, Vector-HaSH with heteroassociation onto the sequence scaffold generates a high-capacity episodic  
368 memory, Fig. 6f. This is in sharp contrast to the poor performance of Hopfield networks and tail-biting autoencoders  
369 attempting to memorize the same sequence of sensory inputs<sup>86</sup>, Fig. 6d-e.

370 In sum, the hippocampal-entorhinal circuit in Vector-HaSH is able to store episodic memory of arbitrary input  
371 sequences with high capacity by exploiting the grid-hippocampal scaffold and vector updating of grid cell states,  
372 even in the absence of any spatial content in the memory.

### 373 Space- and time-complexity of memory in Vector-HaSH

374 The number of synapses in Vector-HaSH scales as  $N_s N_h = \mathcal{O}(N_s)$  for large  $K$  and fixed  $M$  (Fig. 2d right, SI Fig.  
375 S2). The number of nodes  $N_s + N_h + N_g = \mathcal{O}(N_s)$  scales the same way, meaning that Vector-HaSH is a highly sparse  
376 network. The number of stored patterns ranges from  $N_h = \mathcal{O}(1)$  patterns relative to  $N_s$  (with information stored per  
377 pattern given by  $\mathcal{O}(N_s) = \mathcal{O}(\# \text{ synapses})$  bits), all the way up to  $N_s$  patterns (with information stored per pattern  
378 being a nonzero amount), Fig. 6h.

379 For storage and perfect recovery of  $N_h$  patterns of length  $N_s$ , comprising  $I = N_h N_s$  total bits, Vector-HaSH  
380 has a space complexity of  $\mathcal{O}(I)$  (SI Sec. D.4). This is the same as Hopfield-like networks, which also require  
381  $\mathcal{O}(I)$  space to store  $I$  total bits, Fig. 6i (top). The time complexity for perfect recovery in Vector-HaSH scales as  
382  $\mathcal{O}(I^{3/2} \sqrt{N_h/N_s}) \leq \mathcal{O}(I^{3/2})$ . When  $N_h \ll N_s$ , this scaling is faster than Hopfield-like models, which have a time  
383 complexity of  $\mathcal{O}(I^{3/2})$ , Fig. 6i (bottom).

384 When the number of stored patterns is much larger, scaling as  $cN_s$  for  $0 < c \leq 1$ , Vector-HaSH partially recovers  
385 the stored information (Fig. 3). In this regime, Vector-HaSH has further improved time and space complexity relative  
386 to the number of synapses: the required space complexity scales only as  $\mathcal{O}(IN_h/(cN_s))$ , and time complexity scales  
387 only as  $\mathcal{O}(I^{3/2} N_h/(N_s \sqrt{c}))$  (Fig. 6i; see SI Sec. D.4 for a derivation of these scalings).

### 388 Vector-HaSH reproduces multiple additional aspects of hippocampal phenomenology

389 Vector-HaSH reproduces the results of memory consolidation experiments, as well as hippocampal place cell  
390 remapping (cf. Fig. 4) and the phenomenology of splitter cells<sup>110–113</sup>.

391 The multiple traces theory of memory hypothesizes that episodic memory remains hippocampally dependent,  
392 and thus hippocampal damage should result in recall degradation but repeated presentation or recall of a memory  
393 should selectively reinforce it and make it more resistant to damage<sup>114,115</sup>. We exposed Vector-HaSH to a set of  
394 inputs, out of which a fraction were presented or recalled multiple times. Each presentation or recall results in  
395 an further increment of the sensory-hippocampal weights, with the same learning rule. We found that memories  
396 reinforced in this way are remembered with richer detail relative to the rest, even after removal of a fraction of  
397 the hippocampal cells, Fig. 7a-b, SI Fig. S15. An alternative potential mechanism for consolidation could be that  
398 each repeated presentation or recall event activates a new scaffold state, adding associations between the same

399 sensory input and multiple scaffold states. Our numerical results in Vector-HaSH did not support this mechanism, as  
400 associating the same input with two different scaffold states resulted in the activation of a third scaffold state when  
401 the partial input was presented for recall.

402 To model splitter cells (a fraction of hippocampal neurons whose firing in an unchanging environment varies  
403 based on context, e.g. varying with start and target locations, or for random foraging versus directed search)<sup>110–113</sup>,  
404 we assumed that a sufficiently distinct context triggers re-initialization (remapping) across grid modules. A randomly  
405 selected set of initial grid phases is assigned to each context, and sensory-hippocampal-grid associations are built  
406 while traversing the environment in this context. When the agent returns to this context, the stored associations are  
407 recalled.

408 Under these assumptions, we simulate experiments in which splitter cells have been observed. Simulated  
409 grid and place fields on the shared stem of a Y maze are distinct based on the context of a right or a left run;  
410 the same is true for tree-shaped mazes, left- versus right- runs on a one-dimensional track, and clockwise versus  
411 counterclockwise runs on a closed path, Fig. 7c-f, SI Figs. S16,S17,S18. In the simulations, the ratio of splitter or  
412 route- or context-dependent cells to non-splitter cells was similar to the ratios seen in experiments, Fig. 7g, as were  
413 path and ‘directionality indices’ that quantified the degree with which context like the direction of the trajectory  
414 modified field locations<sup>112,113</sup>, Fig. 7h-j. Our results indicate that we would expect similar directionality-dependence  
415 in the spatial tuning curves of grid cells, SI Fig. S19

## 416 Mechanism for the method of loci (memory palace) technique

417 An intriguing memory technique known for millennia, the memory palace or method of loci<sup>116–119</sup>, is widely  
418 exploited by memory athletes in mnemonic competitions<sup>120,121</sup>. Given a list of typically non-spatial items to  
419 memorize, such as a list of names or a sequence of playing cards, memory athletes imagine a walk through a  
420 highly familiar and richly remembered space, such as one’s childhood home or school. They attach the sequence of  
421 items to be memorized by mentally organizing and storing them near different locations and objects in a mental  
422 reimagining of the walk. Through unknown neural circuit mechanisms, this association enables highly accurate  
423 one-shot memorization and recall<sup>122,123</sup>.

424 A simple extension of Vector-HaSH provides the first model for how memory palaces might work, helping to  
425 explain their power. Vector-HaSH is initialized to the start of a spatial trajectory in a highly familiar space. We  
426 assume that the neocortical representations of the sequence of items to be remembered is associated to the *recalled*  
427 *sensory states* in the familiar spatial trajectory. Crucially, even when these recalled trajectory sensory states are mere  
428 approximations of the actual sensory inputs (typical in the memory continuum), the approximate states are reliably  
429 the same: sensory reconstruction in Vector-HaSH is reliable even when approximate, Fig. 3b. Association with this  
430 reconstructed state allows the new patterns to themselves be highly accurately reconstructed even in the memory  
431 continuum of Vector-HaSH. The critical advantage of heteroassociation of new neocortical sequences with sensory  
432 recall states rather than hippocampal states as in episodic memory is that even in the memory continuum, the recall  
433 of new associated inputs is precise and detailed.

434 In sum, Vector-HaSH can explain the power and mechanisms of the memory palace technique: Associating  
435 arbitrary new input sequences with existing memory sequences (even when these are themselves imperfectly recalled)  
436 leads to one-shot high-capacity and high-precision memory for the new input sequences.

## 437 Discussion

438 *Related models:* Vector-HaSH is related to recent memory models<sup>87,99</sup>, in that it shares the idea of a pre-structured  
439 exponential-capacity fixed-point scaffold for memory. However, Ref. 99 does not memorize externally specified  
440 patterns. Like Ref. 87, Vector-HaSH has a tripartite architecture in which external cues are heteroassociated with the  
441 scaffold. However, Ref. 87 does not include grid cell-like representations; as a consequence, the properties of strong  
442 generalization and high-capacity sequence memory from Vector-HaSH are absent in 87.

443 Though dense associative memories are capable of strong large numbers of patterns, their implementation  
444 is abstract in the form an gradient descent on energy landscapes; when implemented in a neural circuit with

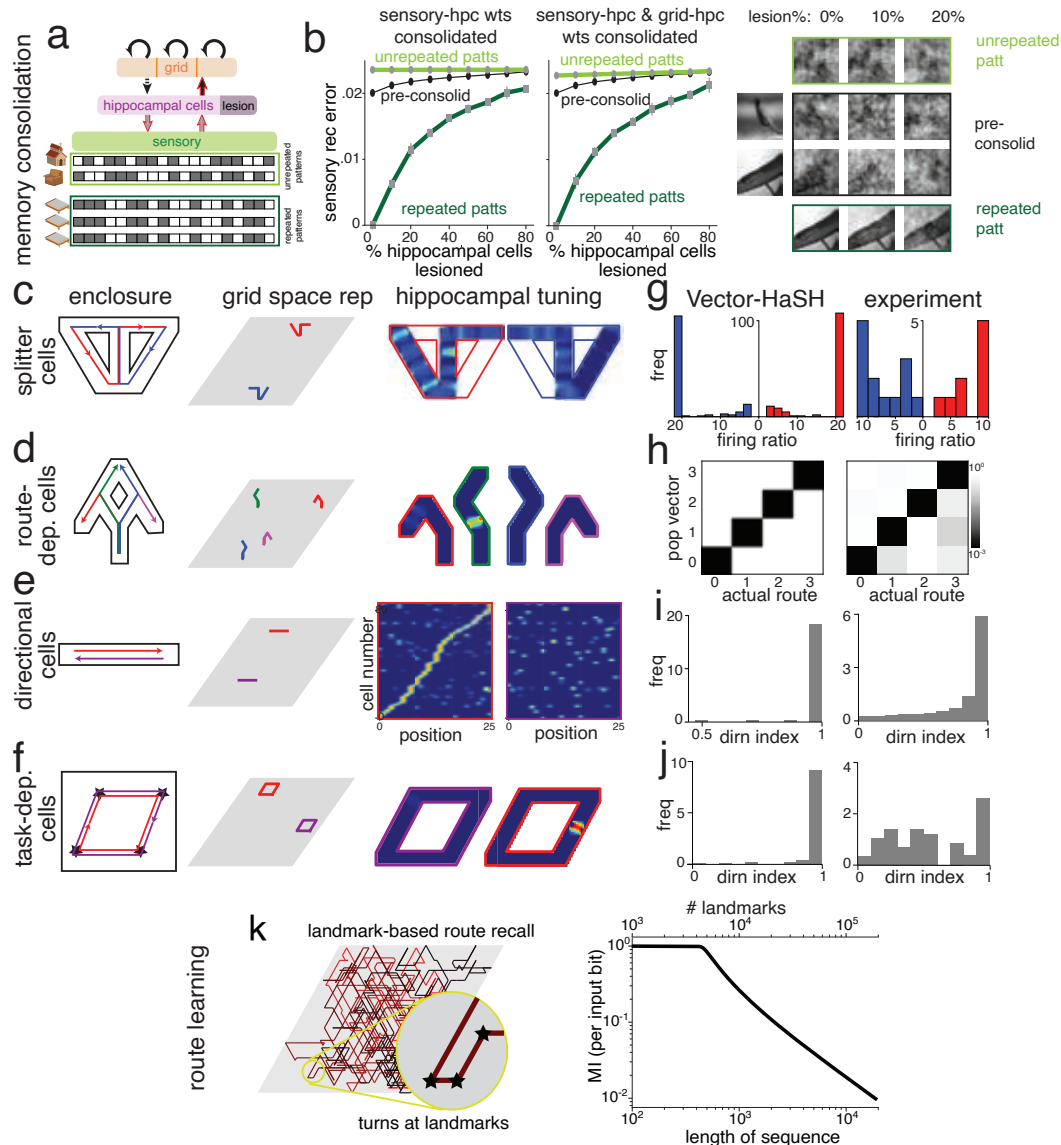

**Figure 7. Vector-HaSH reproduces multiple aspects of hippocampal phenomenology.** (a-b) Memory consolidation simulated in Vector-HaSH via the formation of multiple traces: repetition or recall of some input patterns drives an increment in the strength of the corresponding learned weights (red outlined arrows in (a)). (b) Repeated patterns are recovered, after hippocampal lesion, with smaller error than unrepeated patterns and than any of the patterns pre-consolidation. Recalled states are shown in SI Fig. S15. (c-f) Splitter cells<sup>110</sup>, route-dependent spatial tuning<sup>111</sup>, directional tuning<sup>112</sup>, and task-dependent cells in an open arena<sup>113</sup> can all be modeled by Vector-HaSH if different trajectories traverse different regions of the grid coding space (grid cell remapping). (g-j) Quantification of directional/contextual/route selectivity of responses from the hippocampus in Vector-HaSH (left column) and experiments (right column), corresponding to (c-f). (g) Firing rate distribution shows significantly different left- versus right-turn hippocampal tuning in the model and experiment<sup>110</sup> (see also SI Fig. S18). (h) Ensemble decoding of individual trajectories based on route population vectors, with color indicating the p-value of correct matches made by chance. (SI Sec.3.3 and SI Fig. S16)<sup>111</sup>. (i-j) The directionality index (a normalized metric for the difference in neural activity for different run directions<sup>111,112</sup>) shows that a majority of hippocampal cells have directional fields<sup>112</sup> (Qualitatively similar results hold for a radial maze environment<sup>113</sup>, SI Fig. S17.)



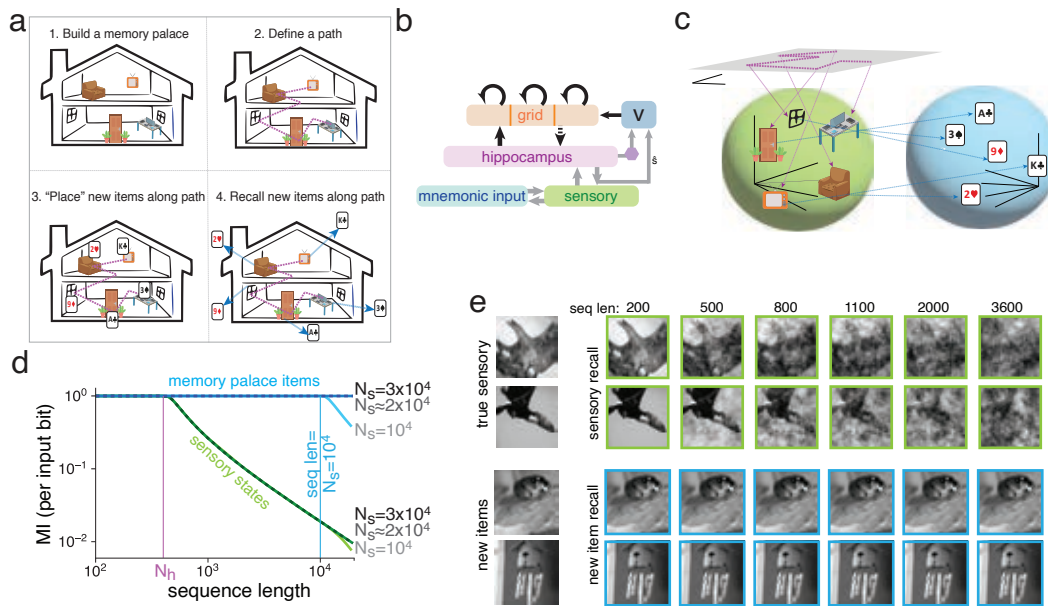

**Figure 8. Method of loci: Accurate recall of arbitrary inputs by heteroassociation onto landmarks in a “memory palace” formed by Vector-HaSH.** (a) The memory palace or Method of Loci technique for memory (figure adapted from<sup>124</sup>). (b) Model of the Method of loci: the full sequential Vector-HaSH circuit serves as a memory scaffold for new inputs, via heteroassociation with the sensory network. The path through the memory palace is learned via sequence learning, as in Fig. 6. The recollected sensory landmarks along the path are now (hetero)associated with the new items to be stored. (c) The large sensory area encoding spatial landmarks now forms the scaffold basis for heteroassociation of arbitrary sensory inputs in neocortex (cf. the smaller hippocampal basis for heteroassociation of sensory inputs within Vector-HaSH). (d-e) Scaffold states for neocortical input in the memory palace model are the (potentially imprecisely) recalled spatial landmarks. Because landmark recall is reliable even when imprecise (Fig. 3g, new items represented in neocortex can be recalled perfectly deep into the memory continuum even where landmark recall is substantially degraded relative to the true landmark, (d). Error bars (too small to be visible): standard deviation over 5 runs. (e) Two examples of the actual spatial landmarks, the recalled sensory states, and the recalled new neocortical inputs in the memory palace model, at different depths into the memory continuum. In (d-e),  $\lambda = [3, 4, 5]$ ,  $N_h = 400$ .

445 pairwise synapses, they require exponentially many neurons (rather than the linearly many of Vector-HaSH) to store  
 446 exponentially many patterns<sup>76, 125, 126</sup>.

447 Vector-HaSH is similar to the hippocampal models of Refs. 127, 128, which also use fixed grid cell representa-  
 448 tions. In 127, hippocampal cells drive a low-dimensional update mechanism via grid cells, like our vector updating  
 449 model. However, in both these models the scaffold is not invariant though the grid representations are fixed because  
 450 the grid-hippocampal weights are learned. Therefore, they lack the properties of high capacity, large basins, and  
 451 strong generalization. These models also do not memorize external inputs and are thus not memory models. A  
 452 related memory model of the hippocampal complex is given in Ref. 72. This model memorizes external cues but like  
 453 127, 128 it lacks a fixed scaffold both because there is no fixed grid representation (recurrent interactions within the  
 454 proto-grid network are (re)learned for each environment) and the grid-hippocampal weights are learned. Therefore,  
 455 it lacks the high capacity and avoidance of catastrophic forgetting properties made possible by a fixed scaffold.  
 456 It also lacks the low-dimensional shift mechanism learned from hippocampal or sensory states, and therefore the  
 457 ability to store sequential memory at any level approaching that needed for episodic memory.

458 Given that the hippocampus is orders of magnitude smaller than the cortical states that represent events  
 459 memorized by hippocampus, it is clear that any model of the hippocampus must involve state compression. In  
 460 Vector-HaSH, the hippocampal representation is compact because the grid-hippocampal circuit functions as a content-



461 independent *pointer* or hash mechanism for content in the cortex. A contrasting way to compress information is via  
462 content-based compression, as done by the bottleneck layer of an autoencoder (Fig. 3 and<sup>129</sup>). As we have seen here,  
463 direct content compression through learning is not highly performant: these models lack the capacity, resistance to  
464 catastrophic forgetting, and sequence memory properties of Vector-HaSH.

465 Nevertheless, the commonalities among many of these models point toward a converging view of the hippocampal  
466 complex. The highly performant features of Vector-HaSH suggest a first-level computational understanding of the  
467 circuit mechanisms of hippocampus as a highly performant memory system. Vector-HaSH is the first model we  
468 know of, besides MESH<sup>130</sup>, that is capable of storing an exponentially large set of input patterns in an associative  
469 content-addressable memory.

470 *Future extensions and directions:* Vector-HaSH accounts for a range of phenomena in entorhinal cortex and  
471 hippocampus<sup>100,110–115</sup>. At the same time, there are numerous avenues for future research and extensions. These  
472 include incorporating different subregions of the hippocampus; relating the phenomena of different hippocampal  
473 LFP frequency peaks and the dominance of different inputs to the structure with the loop of dynamical updating and  
474 information flow in Vector-HaSH; investigating how the hippocampus and Vector-HaSH deal with conflicts between  
475 internal states and external cues and with changes in primary versus contextual inputs; enabling hierarchical and  
476 similarity-respecting representations for distinct but similar memories; exploring the dynamics of fragmentation of  
477 space and events into submaps and discrete episodes (e.g. via surprisal<sup>102</sup>) and map mergers; and understanding the  
478 contribution of different specific cell types and their roles in episodic memory within this circuit.

479 *Relationship to anatomy:* Vector-HaSH is based on the structure of hippocampal-entorhinal circuitry. However,  
480 in some respects it varies from the classic view: While hippocampal outputs to and inputs from entorhinal cortex are  
481 believed to be separated between deep versus superficial layers of entorhinal cortex, the scaffold involves a tight loop  
482 in which grid cells drive hippocampus and receive direct mirrored input back in a way that reinforces the input grid  
483 patterns. This structure is a prediction that the deep-to-superficial entorhinal projection closes a fully self-consistent  
484 loop, which can potentially be tested connectomically. Although much is known about entorhinal-hippocampal  
485 circuitry, new discoveries can still surprise: recent reports show that deep layers of EC, which receive hippocampal  
486 inputs and were believed to primarily send outputs to neocortex in fact send a copy of their outputs back to the  
487 hippocampus<sup>131</sup>.

488 Random grid-to-hippocampal weights were key for several properties of Vector-HaSH, but are they a unique  
489 solution? Our theory and simulations show the sufficiency of random weights and the insufficiency of several  
490 types of non-random or learned weights. However, they do not eliminate the possibility of non-random solutions.  
491 The situation is similar to the construction of expander graphs for high-capacity error-correcting codes<sup>132</sup>: though  
492 non-random solutions can exist in principle, it has been hard to find them, while random connections are sufficient.  
493 Because Vector-HaSH is a full dynamical neural circuit that can be easily and directly queried for experimental  
494 predictions about representation, dynamics, and learning under a large variety of conditions and perturbations.

495 *Summary:* In sum, we have proposed a model that unifies the spatial and episodic memory roles of the  
496 hippocampal complex by showing that nominally spatial representations and architectures are critical for a well-  
497 behaved episodic memory, even if the memories are devoid of spatial content. Unlike unstructured recurrent memory  
498 models<sup>76,84,86,93–98,125,126,133</sup>, the model factorizes the problem of associative memory into one of the creation of  
499 an abstract fixed point scaffold (for robust autoassociative recall of a massive number of abstract states and state  
500 sequences), with separate feedforward heteroassociation (abstract “pointers”) to attach content to these abstract  
501 states. Mathematically, the model creates a hash code for each input pattern, which is given by the scaffold state,  
502 uses the pre-structured recurrent connectivity of the scaffold to be able to recreate those hash states as fixed points  
503 of the dynamics, and then uses the strongly full-rank property of the scaffold to enable (partial) decompression  
504 or reconstruction of the input patterns. In many senses, the model is consistent with past hints of the existence of  
505 abstract sequences that later become associated with newly explored spaces<sup>66,134</sup>. As a result, Vector-HaSH exhibits  
506 biologically realistic features of memory, such as avoiding the memory cliff of existing memory models. It maintains  
507 near-maximal use of its memory potential across a huge variation in numbers of stored memories, by gracefully  
508 trading off memory detail and number of items in memory. For sequence memory, the vectorized and metric nature  
509 of the grid cell states becomes critical: a very large combined sequence length capacity becomes possible when the

510 only information required to specify the next state is a two-dimensional vector specifying direction and distance,  
511 rather than the full pattern of the next state.

512 Vector-HaSH provides a computational hypothesis for the mechanisms of the memory palace technique, based on  
513 understanding the advantages of co-localizing spatial and non-spatial memory. The model explains why impressive  
514 memory performance does not require exceptional intellectual ability or structural brain differences, but can be  
515 leveraged by anybody trained to appropriately engage the hippocampus<sup>120, 122, 135</sup>. From a neuro-AI perspective, the  
516 specific biological architectures, representations, and learning rules of Vector-HaSH led it to significantly outperform  
517 fully end-to-end supervised trainable memory models with similar architectures, comparable or more parameters,  
518 and fewer constraints – a realization of the hypothesis that biological structures (inductive biases) can produce better  
519 performance than fully end-to-end trained models as commonly used in machine learning.

## 520 Methods

521 In<sup>87</sup>, the MESH associative memory architecture was introduced, leveraging a three-layer network to store numerous  
522 independent memory states. This architecture allowed for a high-capacity memory with a trade-off between the  
523 number of stored patterns and the fidelity of their recall. However, MESH did not require specifically grid cell  
524 encodings, did not exhibit strong generalization in scaffold learning, and did not exhibit a high sequence capacity.

525 In Vector-HaSH, our memory scaffold consists of a recurrent circuit incorporating MEC grid cells and a  
526 hippocampal layer that may be interpreted as the proximal CA1 and distal CA3 regions of the hippocampal complex.  
527 Specifically, we represent the MEC grid cells as outlined in Ref.<sup>136</sup>, where each grid module's state is expressed  
528 using a one-hot encoded vector that represents the module's phase (and thus the active grid cell group within the  
529 module). The states are on a two-dimensional discretized hexagonal lattice with period  $\lambda$ . Thus, the state of each  
530 grid module is represented by a vector with a dimensionality of  $\lambda^2$ .

$M$  such grid modules are concatenated together to form a collective grid state  $g \in \{0, 1\}^{N_g}$ , where the  $N_g = \sum_M \lambda_M^2$ .  
The continuous attractor recurrence in the grid layer<sup>33</sup> is represented by a module-wise winner-take-all dynamics,  
which ensures that the equilibrium states of  $g$  always correspond to a valid grid-coding state.

$$g(t+1) = \text{CAN}[g(t)]. \quad (1)$$

531 We represent these equilibrium states by  $g_{\vec{x}}$ , where we index the coding states by the two-dimensional location  $\vec{x}$ .  
532 For coprime periods  $\lambda_M$ , the grid states can encode a spatial extent of  $N_{patts} = \prod_M \lambda_M^2$  spatial locations.

This layer of grid cells projects randomly onto the hippocampal layer, through a  $N_h \times N_g$  random matrix  $W_{hg}$ ,  
with each element drawn independently from a Gaussian distribution with a mean of zero and standard-deviation one  
 $N(0, 1)$ . This matrix is sparsified such that only a  $\gamma$  fraction of connections is retained, leading to a sparse random  
projection. This projection constructs an  $N_h$  dimensional set of hippocampal sparse states,  $h_{\vec{x}}$  defined as

$$h_{\vec{x}} = \text{ReLU}[W_{hg}g_{\vec{x}} - \Theta]. \quad (2)$$

The return weights from the hippocampal layer back to the grid cell layer is set up through Hebbian learning between  
the predetermined set of grid and hippocampal states,  $g_{\vec{x}}$  and  $h_{\vec{x}}$ .

$$W_{gh} = \frac{1}{N_h} \sum_{\vec{x}} g_{\vec{x}} h_{\vec{x}}^T. \quad (3)$$

The dynamics of the hippocampal scaffold is then set up as

$$g(t+1) = \text{CAN}[W_{gh}h(t)] \quad (4)$$

$$h(t+2) = \text{ReLU}[W_{hg}g(t) - \Theta] \quad (5)$$

$$(6)$$

533 These equations maintain each  $g_{\vec{x}}, h_{\vec{x}}$  state as a fixed point of the recurrent dynamics, as we prove in SI Sec. C.1.

This constructed hippocampal memory scaffold is then used to generate independent memory locations to store information presented through a sensory encoding layer, representing the non-grid cell component of the Entorhinal cortex. Information to be stored is presented as a binary encoding of states in the sensory layer, and is ‘tagged’ onto a memory location  $\vec{x}$  of the scaffold through pseudo-inverse learned heteroassociative weights.

$$W_{hs} = HS^+, \text{ and,} \quad (7)$$

$$W_{sh} = SH^+, \quad (8)$$

534 where  $H$  is a  $N_h \times N_{patts}$  dimensional matrix with columns as the predetermined hippocampal states  $h_{\vec{x}}$ , and  $S$  is a  
535  $N_s \times N_{patts}$  dimensional matrix with columns as the encoded sensory inputs to be stored at location  $\vec{x}$ . To reduce  
536 computational time-complexity, we use an exact pseudoinverse rather than an iterative pseudoinverse for calculation  
537 of these inter-layer weights, unless otherwise specified.

Given the above equations, we can now perform bi-directional inference of sensory inputs from grid states and vice versa:

$$h(t+1) = \text{ReLU}[W_{hs}s(t)] \quad (9)$$

$$g(t+1) = \text{CAN}[W_{gh}h(t+1)] \quad (10)$$

and

$$h(t+2) = \text{ReLU}[W_{hg}g(t) - \Theta] \quad (11)$$

$$s(t+2) = \text{sgn}[W_{sh}h(t+2)] \quad (12)$$

538 The above two sets of equations can then be combined to use Vector-HaSH as a content-addressable memory to  
539 recover stored sensory inputs from corrupted inputs — first the grid states are inferred from the corrupted sensory  
540 input, and then the true sensory input is recalled from the inferred grid state.

541 The above equations have been written considering sensory inputs to be random binary states. In cases where  
542 sensory states are continuous valued (as in Fig. 3b, for example) the  $s$  reconstruction equation, Eq. (12) is replaced  
543 with simply  $s(t+2) = W_{sh}h(t+2)$ .

544 Equations (1-12) describe the core working of Vector-HaSH— this core version and its variants can then be used  
545 to generate item memory, spatial memory, episodic memory, as well as a wide range of experimental observations,  
546 such as those discussed in Fig. 7.

## 547 1 High-capacity pattern reconstruction

548 For the basic task of pattern storage and reconstruction, we utilize the simplest form of Vector-HaSH without any  
549 additional components. To examine reconstruction capacity,  $N_{patts}$  sensory cues are stored in the network via training  
550 the  $W_{hs}$  and  $W_{sh}$  weights as described in Eqs. (7-8).

551 The  $N_{patts}$  sensory cues need to be stored corresponding to distinct scaffold states. In our implementation, for  
552 simplicity, we selected scaffold states in a “hairpin” like traversal, similar to that shown in Fig. 5a *top middle* to  
553 achieve this.

554 Then, a clean or corrupted version of a previously stored pattern is presented to the network in the sensory  
555 encoding layer, which then propagates through the network via Eqs. (9-12), finally generating the recalled pattern  $s$ .

556 In all numerical examples we consider in the main text we either construct random binary  $\{-1, 1\}$  patterns, or  
557 consider images from `mini-imagenet`<sup>137</sup>. In particular, we took 3600 images from the first 6 classes  $\{\text{‘house-}$   
558  $\text{finch’}, \text{‘robin’}, \text{‘triceratops’}, \text{‘green-mamba’}, \text{‘harvestman’}, \text{‘toucan’}\}$  and center-cropped them to consider the middle  
559  $60 \times 60$  image and converted them to grayscale. We refer to this set of grayscale images as `bw-mini-imagenet`.  
560 In all models, the memorized patterns are a noise-free set, then we test memory recall with noise-free, partial, or  
561 noisy cues.

562 In Figs. 2, 3, the recall performance and quality was examined in networks with three grid modules,  $\gamma = 0.6$ ,  
563 and  $\theta = 0.5$ .

564 The capacity in Fig. 2c(right) was evaluated by injecting a noise into the hippocampal layer of magnitude 20%  
 565 of the magnitude of the hippocampal state vector, and requiring the iterated dynamics to return the hippocampal state  
 566 to within 0.6% of the original hippocampal state (Here magnitudes and distances were calculated via an  $L^2$  metric).  
 567 In Fig. 2d(left) and SI Fig. S2, the critical  $N_h^*$  is estimated as the smallest value of  $N_h$  such that all scaffold states  
 568 have been stabilized as fixed points. The corresponding module periods for data points plotted in SI Fig. S2, for two  
 569 modules are listed in Table. 1 left, and for three modules are listed in Table. 1 right. Similarly, the grid module  
 570 periods for the data in Fig. 2c(left) are listed in Table 2.

| $\lambda$ | $N_g$ | $N_{patts}$ |
|-----------|-------|-------------|
| 2,3       | 13    | 36          |
| 3,4       | 25    | 144         |
| 4,5       | 41    | 400         |
| 5,6       | 61    | 900         |
| 6,7       | 85    | 1764        |
| 7,8       | 113   | 3136        |

| $\lambda$ | $N_g$ | $N_{patts}$ |
|-----------|-------|-------------|
| 1,2,3     | 14    | 36          |
| 2,3,5     | 38    | 900         |
| 3,4,5     | 50    | 3600        |
| 4,5,7     | 90    | 19,600      |
| 5,6,7     | 110   | 44,100      |

**Table 1.** Grid module periods, number of grid cells and total number of patterns for data in Fig. 2e.

| $\lambda$ | $N_g$ | $N_{patts}$ |
|-----------|-------|-------------|
| 7,8       | 113   | 3136        |

| $\lambda$ | $N_g$ | $N_{patts}$ |
|-----------|-------|-------------|
| 3,5,8     | 98    | 14400       |

| $\lambda$ | $N_g$ | $N_{patts}$ |
|-----------|-------|-------------|
| 3,4,5,7   | 99    | 176400      |

| $\lambda$ | $N_g$ | $N_{patts}$ |
|-----------|-------|-------------|
| 1,3,4,5,7 | 100   | 176400      |

**Table 2.** Grid module periods, number of grid cells and total number of patterns for data in Fig. 2f.

571 To estimate the basin sizes of the patterns stored in the scaffold, as shown in Fig. 2e, we compute the probability  
 572 that a given pattern is perfectly recovered (i.e., remains within its correct basin) as we perturb the hippocampal states  
 573 with a vector of increasing magnitude. We assume that the size of any given basin can be estimated as the typical  
 574 magnitude of perturbation that keeps the system within the same basin of attraction — this is not generally true  
 575 for non-convex basins, particularly in high-dimensional spaces. However, this estimate is relevant in the context  
 576 of testing robustness under corruption with uncorrelated noise. Further, we later demonstrate in SI Sec. C.3 that  
 577 the basins are indeed convex. Here grid module periods  $\lambda = [3, 4, 5]$ , number of grid cells  $N_g = 50$ , and  $N_h = 400$   
 578 hippocampal cells were used. Probability that a given pattern remains within its correct basin was estimated by  
 579 computing the fraction of runs where a given pattern was correctly recovered for a 100 different random realization  
 580 of the injected noise.

581 Figure 2f examines the learning generalization in Vector-HaSH, i.e., the capability of Vector-HaSH to self-  
 582 generate fixed points corresponding to scaffold grid-hippocampal states despite training on a smaller number of fixed  
 583 points. For a given number of training patterns, we calculate the number of generated fixed points by counting the  
 584 number of states that when initialized at a scaffold state remain fixed upon iteration through Eqs. 4,5. As discussed in  
 585 the main text, when training on a given number of training patterns (that is less than the complete set of all patterns),  
 586 the ordering of the patterns is crucial in controlling the generalization properties of the model. For Vector-HaSH, we  
 587 order patterns such that a two-dimensional contiguous region of space is covered (see Sec. C.4 for additional details  
 588 of the ordering and the freedom of possibilities in this ordering), resulting in the strongest generalization (Sec. C.4).  
 589 For comparison, in Fig. 2f we also consider “shuffled hippocampal states”, wherein scaffold states are randomized  
 590 in order before subsets are selected for training. We also consider “random hippocampal states”: here we consider  
 591 each hippocampal state vector and randomize its indices, in effect constructing a new state vector with exactly the  
 592 same sparsity and statistics, but now uncorrelated to the grid state corresponding to that hippocampal state. Then, we  
 593 use bi-directional pseudoinverse learning between grid and hippocampal states and construct this as a scaffold. This

594 lack of structured correlations between grid and hippocampal population vectors results in catastrophic forgetting,  
 595 with no observed fixed points remaining once all scaffold states have been used for training.

596 All curves shown in Fig. 3c-f are averaged over 5 runs with different random initialization of the predefined  
 597 sparse connectivity matrix  $W_{hg}$ , error bars shown as shaded regions represent standard deviation across runs. In  
 598 Figs. 3b,e,h, grid module periods  $\lambda = [3, 4, 5]$ ,  $N_g = 50$ ,  $N_s = 3600$  was used. The total capacity of the network  
 599 in this case is capped by  $N_{patts} = \prod_M \lambda_M^2 = 3600$ . In Fig. 3d, all shown networks have  $\approx 5 \times 10^5$  synapses, with  
 600 Vector-HaSH module periods  $\lambda = [2, 3, 5]$ , and layer sizes:  $N_g = 38$ ,  $N_h = 275$ ,  $N_s = 900$ . Number of nodes in other  
 601 networks are as follows: (i) Hopfield network of size  $N = 708$ , synapses =  $N^2$ . (ii) Pseudoinverse Hopfield network  
 602 of size  $N = 708$ , synapses =  $N^2$ . (iii) Hopfield network with bounded synapses was trained with Hebbian learning on  
 603 sequentially seen patterns. Size of the network  $N = 708$ , synapses =  $N^2$ . (iv) Sparse Hopfield network (with sparse  
 604 inputs) with a network size of  $N = 708$ , synapses =  $N^2$ , sparsity =  $100(1 - p)$ . (v) Sparse Hopfield network. Size of  
 605 the network  $N$ , synapse dilution  $\kappa$ , synapses =  $\kappa \times N^2 = 10^5$ . (vi) Tailbiting Overparameterized Autoencoder<sup>86</sup> with  
 606 network layer sizes 900, 275, 38, 275, 900.

607 For stored patterns of size  $N$ , recall of an independent random vector of size  $N$  would appear to have a mutual  
 608 information of  $\sim 1/\sqrt{N}$ , which when evaluating the total mutual information across all  $\mathcal{O}(N)$  patterns or more  
 609 would appear to scale as  $\mathcal{O}(\sqrt{N})$ , despite no actual information being recalled. To prevent this apparent information  
 610 recall, in Fig. 3f if the information recall is smaller than  $1/\sqrt{N}$  we then set it explicitly to zero.

611 To examine Vector-HaSH's performance on patterns with correlations, in Fig. 3e we trained it on `bw-mini-imagenet`  
 612 images using grid module sizes  $\lambda = [3, 4, 5]$ , and layer sizes:  $N_g = 50$ ,  $N_h = 400$ ,  $N_s = 3600$ . The plotted curve  
 613 shows the mean-subtracted cosine similarity between recovered and stored patterns illustrating that Vector-HaSH  
 614 shows gradual degradation as the number of stored patterns is increased. The resultant curve is an average over 5  
 615 runs with different sparse random projections  $W_{hg}$ .

616 In Fig. 7b, Vector-HaSH with grid module periods  $\lambda = [3, 4, 5]$ ,  $N_g = 50$ ,  $N_h = 400$ ,  $N_s = 3600$  was used, with  
 617 random binary patterns in *left,middle*, and `bw-mini-imagenet` patterns in *right*. The results are averaged over 20  
 618 runs. Iterative online pseudoinverse learning<sup>91</sup> (with  $\epsilon = 0.01$ ) was used to reinforce a subset of patterns by adding  
 619 addition traces to all the learnable weight matrices  $W_{hs}$ ,  $W_{sh}$  and  $W_{gh}$ .  $W_{hs}$  reinforcement mathematically doesn't  
 620 change  $W_{hs}$  due to iterative pseudoinverse being perfect from sensory to hippocampal layer. However, since  $W_{sh}$   
 621 leads to a gradual decay of reconstructed  $s$  states (i.e., iterative pseudoinverse learning from hippocampal layer to  
 622 sensory cell layer is lossy), therefore reinforcement in  $W_{sh}$  changes these weights. Additional results from each layer  
 623 of Vector-HaSH while testing the Multiple-Trace Theory are shown in Fig. S15, right. Further, Fig. S15, left shows  
 624 the results when only  $W_{sh}$  weights are reinforced, assuming pre-trained scaffold weights  $W_{gh}$ . In both case, same  
 625 parameter settings were used as in Fig. 7b.

## 626 1.1 Multiple Traces Theory

627 In Fig 7b, we consider Vector-HaSH with  $\lambda = [3, 4, 5]$ ,  $N_g = 50$ ,  $N_h = 400$ ,  $N_s = 3600$ ,  $\gamma = 0.6$ , and  $\theta = 0.5$ . The  
 628 model was trained on 3600 images from `bw-mini-imagenet`. For sensory inputs presented multiple times, the  
 629 sensory hippocampal weights are reinforced multiple times using online pseudoinverse learning rule<sup>91</sup> (Fig 7b),  
 630 and the grid hippocampal weights are reinforced multiple times using Hebbian learning (Fig 7b, right). Given a  
 631 particular lesion size, the cells to be lesioned are randomly chosen from the set of all hippocampal cells, and their  
 632 activation is set to zero. Sensory recovery error is defined as the mean L2-norm between the ground truth image and  
 633 the image reconstructed by the model. During testing, the model receives the ground truth sensory image as input,  
 634 and the reconstruction dynamics are as follows:

$$h(t+1) = \text{ReLU}[W_{hs}s(t)] \quad (13)$$

$$g(t+1) = \text{CAN}[W_{gh}h(t+1)] \quad (14)$$

$$h(t+2) = \text{ReLU}[W_{hg}g(t+1) - \Theta] \quad (15)$$

$$s(t+3) = \text{sgn}[W_{sh}h(t+2)]. \quad (16)$$



## 2 Mapping, recall, and zero-shot inference in multiple spatial environments without catastrophic interference.

Here we add a path-integration component to Vector-HaSH, that utilizes a velocity input to change the grid cell population activity akin to Ref.<sup>33</sup>, such that the phase represented by each module changes in correspondence to the velocity input. Corresponding to the discrete hexagonal lattice space used to represent each grid module, for simplicity the velocity is assumed to have one of six directions, and magnitude is assumed to be fixed at a constant such that the phase of each grid module updates by a single lattice point in a single timestep. This input velocity vector, that we call a velocity shift operator,  $\vec{v}$ , is thus represented by a six-dimensional one-hot encoded vector determining the direction of the shift.

In order to capture the inherent randomness and uncertainty present in real-world scenarios, a small amount of neuronal noise was introduced by adding random perturbations to the activation values of hippocampal cells in Vector-HaSH. This noise, generated from a uniform distribution between 0 and 0.1, mimics the fluctuations and disturbances observed in individual neurons, and corresponds to a noise magnitude of roughly 25% the magnitude of the hippocampal state vectors.

In Fig. 4a,c we first demonstrate bi-directional recall of grid states from sensory inputs and vice versa. Here we consider Vector-HaSH with  $\lambda = [3, 4, 5]$ ,  $N_g = 50$ ,  $N_h = 400$ ,  $N_s = 3600$ . We train the model on a total of 600 sensory inputs taken from `bw-mini-imagenet` (including the 4 landmarks placed in the room shown in Fig. 4c). To demonstrate zero-shot recall in panel c, the model dynamics are simulated on a novel trajectory (right) through the same room with some locations overlapping with the previous trajectory. Note that the reconstructed landmarks do not have perfect recall. Instead, the reconstructions are degraded relative to the originally stored landmarks since the total number of stored landmarks in the model exceeds  $N_h = 400$  (Fig. 2f).

For all other panels of Figure 4, we use Vector-HaSH with grid module periods  $\lambda = [3, 4, 5, 7]$ ,  $N_g = 99$ ,  $N_h = 342$ ,  $\gamma = 0.1$ , and  $\theta = 2$ . The total capacity of this grid coding space is  $176400 \approx 2 \times 10^5$ . Each room is stored by allocating a random  $10 \times 10$  patch of the grid coding space to it (This is constructed by first choosing any random point in the room to map to a randomly chosen area of the grid coding space. Then as the model moves in the room, path integration correspondingly updates the grid phases in each grid module. The region of grid coding space explored as the model physically explores a room is then the patch of grid coding space storing the particular room).

To each of the 100 locations comprising a room, we simulate an independent sensory landmark as a binary  $\{-1, 1\}$  vectors. At initialization, before observing any room, we begin with a pretrained memory scaffold, wherein the  $W_{hg}$  and  $W_{gh}$  matrices have already been constructed and trained corresponding to Eqs. 2, 3.

When first brought to a room, the grid state is initialized to the grid state vector corresponding to the random region of grid coding space allocated to the room. Then, as path integration updates the grid state upon moving around the room, the observed sensory landmark states are associated with the corresponding grid-hippocampal scaffold states through learning the  $W_{hs}$  and  $W_{sh}$  matrices following Eqs. 7, 8.

In the first two tests of each room (first tested right after each room has been learned, and then tested after all rooms have been learned; shown in Fig. 4d) sensory landmark cues can be observed by Vector-HaSH. Using Eq. 9, the observed sensory landmarks can be used to reconstruct the hippocampal state, resulting in the reliably reconstructed hippocampal tuning curves as seen in Fig. 4e. For testing stable recall in dark (Fig. 4d,e), Vector-HaSH is provided a random single sensory landmark cue from any given room. This landmark is used to ascertain the grid state corresponding to that landmark through Eq. 9. Thereafter, path integration is used to construct the grid-hippocampal scaffold state as room is explored in the absence of any further sensory cues. As seen in Fig. 4e this also reliably reconstructs the hippocampal state at each location in every room.

In Fig. 4f, we examine the dark recall of 3600-dimensional sensory landmarks in each room in a continual learning setting. Here we begin again with simply the pretrained grid-hippocampal scaffold. As the  $i^{\text{th}}$  room is explored, the sensory-hippocampal weight matrices are updated to store the thus far observed landmarks and their locations. At each step of exploration within the  $i^{\text{th}}$  room, Vector-HaSH is queried on the current and all previous rooms in the following fashion: for any completed room  $j$  (i.e.,  $0 \leq j < i$ ), Vector-HaSH is dropped randomly anywhere in the room and allowed to observe the sensory landmark solely at that start location and no further sensory

683 landmarks. Then the model moves around the room through path integration, and attempts to predict the sensory  
684 landmarks that would be observed at each location. We then compute the average mutual information recovered  
685 for each landmark at each position in the room, which is shown in Fig. 4f. For the partially completed room  $i$ ,  
686 Vector-HaSH is similarly dropped randomly in the room, restricted to the set of previously observed locations  
687 within the room. The mutual information recovered during sensory prediction is similarly only evaluated over the  
688 previously observed portion of the room.

689 For the baseline model shown in Fig. 4f, we first construct the grid-hippocampal network through random  
690 hippocampal states with the same sparsity as those in Vector-HaSH, and bi-directional pseudoinverse learning  
691 between grid and hippocampal layers. Thereafter, the sensory landmarks are associated with the hippocampal layer  
692 as in Vector-HaSH described above, and this baseline model is subjected to an identical test protocol to examine  
693 continual learning. The number of nodes in the baseline model is kept identical to Vector-HaSH.

694 For Fig. 4h, we follow the same analysis as in the experiment<sup>100</sup>. Dot product between population vectors (PVs)  
695 across all combinations of the eleven test rooms were computed. To construct the population vectors, we record the  
696 activations of hippocampal cells for each of the  $10 \times 10$  positions in the simulated room. We stack these into 100  
697 composite population vectors (PVs), one for each position in the room. To compute overlaps between representations,  
698 the activation of each hippocampal cell in any particular room was expressed as a ratio of its activation to the maximal  
699 activation of that cell across all rooms. The overlap was then calculated as the normalized dot product between the  
700 hippocampal cell activation vectors in two rooms i.e., the sum of the products of corresponding components divided  
701 by the total number of hippocampal cells ( $N_h = 342$ ) for a given position/pixel, averaged over 100 positions. The  
702 color-coded matrix in Fig. 4h shows the average dot product values for PVs across rooms ( $\binom{11}{2} = 55$  room pairs).  
703 Repeated exposures to three familiar rooms were also added to this analysis leading to a total of  $\binom{14}{2} = 91$  room  
704 pairs.

705 For Fig. 4j, we plot the distribution of PV normalized dot products computed above (for multiple visits to all the  
706 rooms) and use this PDF to compute the corresponding CDF. Similarly, the CDFs for shuffled data are computed  
707 through the same procedure, but using shuffled data to compute the PV normalized dot products. Shuffled data is  
708 obtained either by random assignment of rate maps across rooms (shuffle room) or by shuffling of cell identities  
709 within rooms (shuffle cells) or by a combination of the two procedures (shuffle room and cells). The number of  
710 different shuffles generated in each case was 1000.

### 711 3 Path learning in the hippocampal scaffold

712 Here again, we add a path-integration component to Vector-HaSH as described in the section above, such that a  
713 velocity shift operator,  $\vec{v}$ , can be used to path integrate and update the grid cell population activity akin to Ref.<sup>33</sup>,  
714 such that the phase represented by each module changes in correspondence to the input shift.

715 For learning of trajectories in space, this vector  $\vec{v}$  is either associated with spatial locations and corresponding  
716 hippocampal state vectors (as in path learning) or with sensory landmark inputs (as in route learning).

717 The results in Fig. 5 and Fig. 6 were generated using  $N_h = 500$ ,  $\gamma = 0.6$ ,  $\theta = 0.5$ ,  $M = 3$  and  $N_s = \prod_M \lambda_M^2$  with  
718  $\lambda = [5, 9, 13]$  in Fig. 5b-e, Fig. 6b and  $\lambda = [3, 4, 5]$  in Fig. 5f,g, Fig. 6c.

719 All networks in Fig. 6e were constructed to have approximately  $5 \times 10^5$  synapses, with network parameters  
720 identical to those in Fig. 3d. All panels in Fig. 6 considers random binary patterns, apart from Fig. 6c,d which  
721 considers bw-mini-imagenet images.

#### 722 3.1 Path learning

Learning associations from the hippocampal layer directly to the velocity inputs through pseudoinverse learning  
would result in perfect recall for only  $N_{seq} \leq N_h$ , which may be much smaller than the grid coding space, and would  
hence result in an incapability to recall very long sequences. To obtain higher capacity, we learn a map from the  
hippocampal cell state to the corresponding velocity inputs at that spatial location through a multi-layer perceptron,  
MLP. For all the results shown in Fig. 5 and Fig. 6c,h, we use a single hidden layer in the MLP with 250 nodes.

The dynamics of the network are as follows:

$$\vec{v}(t) = \text{MLP}[h(t)] \quad (17)$$

$$g(t+1) = \text{PI}[g(t); \vec{v}(t)] \quad (18)$$

$$h(t+1) = \text{ReLU}[W_{hg}g(t+1) - \Theta] \quad (19)$$

$$s(t+1) = \text{sgn}[W_{sh}h(t+1)] \quad (20)$$

$$(21)$$

## 723 3.2 Route learning

Since detailed sensory information cannot be recalled at very high capacities, route learning is performed by learning associations between the *recollection* of the sensory inputs at a location  $\vec{x}$ , and the velocity shift vector  $\vec{v}$  determining the direction of motion of the trajectory being learned at that location. This association can be learned directly through pseudoinverse learning as

$$W_{vs} = VS_r^+, \quad (22)$$

where,  $S_r$  is a  $N_s \times N_{seq}$  dimensional matrix with columns as the recalled sensory inputs  $s_{\vec{x}}$ , and  $V$  is a  $6 \times N_{seq}$  dimensional matrix with columns as the corresponding velocities. These associations can then be used to recall long trajectories through

$$\vec{v}(t) = \text{WTA}[W_{vs}s(t)] \quad (23)$$

$$g(t+1) = \text{PI}[g(t); \vec{v}(t)] \quad (24)$$

$$h(t+1) = \text{ReLU}[W_{hg}g(t+1) - \Theta]s(t+2) = \text{sgn}[W_{sh}h(t+1)] \quad (25)$$

$$(26)$$

724 As argued in Sec. D.6, this results in perfect sequence recall for  $N_{seq} \leq N_s$ , which can scale as the exponentially  
725 large capacity of the grid coding space.

## 726 3.3 Goal and context-based remapping

727 When initialized in a new environment, we model the grid state population activity to be randomly initialized in the  
728 grid-coding space (a mechanistic model for such random initialization will be discussed in future work), i.e., the  
729 grid state undergoes *remapping*. This grid coding state, along with the corresponding hippocampal coding state and  
730 sensory observations at that location are then stored in the corresponding weight matrices, i.e.,  $W_{hs}$  and  $W_{sh}$ , via Eqs.  
731 (7-8). When brought back to a previously seen environment, these weight matrices in Vector-Hash use the observed  
732 sensory observations to drive the hippocampal cell (and hence grid cell) population activity to the state initialized at  
733 the first traversal of that environment.

734 Similar to new environments, we also model contextual information (such as goals, rewards, start-end location  
735 pairs) to be appended to the sensory inputs. We allow new contextual information to also trigger reinitialization of  
736 grid state, which then permits storage of multiple paths that involve the same spatial location, provided that they are  
737 distinguished by a contextual signal.

738 We use this set up of manual reinitialization of the grid state to reproduce the experimental observations of  
739 splitter cells<sup>110</sup>, route dependent place cells<sup>111</sup>, directional place fields in one-dimensional environments<sup>112</sup> and on  
740 directed routes in two-dimensional environments<sup>113</sup> in Fig. 7c-j; and of directional place fields in a radial eight-arm  
741 maze<sup>113</sup> in Fig. S17. In all of these cases, we first generate trajectories corresponding to the paths that the animals  
742 are constrained to traverse in the given experiment. These trajectories, are then stored in Vector-Hash at a random  
743 location in the grid coding space through a path learning mechanism. At new contexts, the grid state in the model is  
744 reinitialized and the agent then continues at a new location in the grid coding space. This results in different spatial  
745 firing fields, irrespective of whether the agent is at the same spatial location as in a different previous context.

746 For all the simulations in Fig. 7c-j and Fig. S17, Vector-HaSH with  $\lambda = [3, 4, 5, 7]$ ,  $N_h = 500$ ,  $N_g = 99$ ,  $\theta = 2.0$   
747 and  $\gamma = 0.10$  was used. The total size of the grid coding space is  $420 \times 420 \approx 10^5$ . In order to capture the inherent  
748 randomness and uncertainty present in real-world scenarios, a small amount of neuronal noise was introduced by  
749 adding random perturbations to the activation values of hippocampal cells in Vector-HaSH. This noise, generated  
750 from a uniform distribution between 0 and 0.1, mimics the fluctuations and disturbances observed in individual  
751 neurons.

752 **Splitter cells** : For Fig. 7c,g, we follow an analysis method similar to the analysis done on the experimental data<sup>110</sup>.  
753 The central stem is divided into 4 equal regions (Fig. S18b), and the mean activation of every hippocampal cell is  
754 computed in each of the four regions. Figure S18c plots mean activations in each of the four regions, of cells that  
755 show different activity patterns as Vector-HaSH traverses the central stem on Left-Turn and Right-Turn trials. The  
756 "activation ratio" on Right-Turn trials versus Left-Turn trials is then calculated for each cell in the region for which  
757 the given cell has maximum difference in activations. The distribution of these activation ratios is plotted in Fig. 7g,  
758 that shows the frequency distribution of cells with preferential firing associated with Left-Turn or Right-Turn trials.  
759 Note that the distribution of cells preferring left-turn and right-turn trials is approximately even. The percentage of  
760 hippocampal cells with non-differential firing was found to be  $\approx 3.896\%$ , and the percentage of hippocampal cells  
761 with differential firing was found to be  $\approx 96.103\%$  in Vector-HaSH (using a threshold of 2 on the activation ratio).

762 **Route encoding** : In Fig. 7d,h we employed an ensemble analysis approach mirroring that used in<sup>111</sup> to validate  
763 if hippocampal cells demonstrate route-dependent activity. Our simulated session comprised four blocks, each  
764 representing one of four routes (0-3), with 11 trials per block. We performed ensemble analysis on the maze region  
765 common to all routes.

766 We compared the population vector (PV)—activations of all hippocampal cells on an individual trajectory—to  
767 the average activation of these cells across all trajectories on each route (route-PV). Specifically, we compared the  
768 PVs for each trajectory to the average activation population vectors (route-PVs) of all four routes, excluding the  
769 trajectory in consideration from its route-PV calculation to avoid bias.

770 Using cosine similarity, we assessed the likeness between each trajectory PV and each of the four route PVs. We  
771 then calculated the fraction of correct matches (the highest similarity score was with its corresponding route-PV)  
772 and incorrect matches (a higher similarity score was with a different route-PV). The comparison results are shown in  
773 Fig. S16a, left.

774 We repeated the process 10,000 times with randomized data to estimate the chance probability of correct matches.  
775 We randomized the session data by shuffling trials across blocks, randomly assigning each trajectory to one of the  
776 four routes, thereby disrupting any correlation between the hippocampal cell activations and a specific route. Fig.  
777 S16a,right depicts a typical result from one such shuffle.

778 For each matrix element ( $i, j$ ), we plotted the distribution of data from these 10,000 matrices in Fig. S16b. We  
779 then estimated the Probability Density Function (PDF) from this distribution using a Gaussian kernel (Python's  
780 `scipy.stats.gaussian_kde` method). To gauge the chance probability of correct matches in our original,  
781 unshuffled analysis, we calculated the percentile position of our observed match proportion, referencing the same  
782 matrix element ( $i, j$ ) from the unshuffled matrix in Fig. S16a.

783 Fig. 7h presents the probability of correct matches in the unshuffled analysis based on these distributions  
784 from 10,000 shuffles. Low diagonal values indicate that trajectories significantly match only their corresponding  
785 route-PVs.

786 **Directional cells** : For Figs. 7i,j and Fig. S17, the directionality index is defined similar to that defined for  
787 the experimental data analysis<sup>112,111</sup>. Given the activation ( $A$ ) of a hippocampal cell in positive and negative  
788 running directions ( $A_+$  and  $A_-$ ), we define the directionality index as  $|A_+ - A_-| / |A_+ + A_-|$ . By this definition,  
789 a directionality index of one indicates activity in one direction only, and a directionality index of zero indicates  
790 identical activity in both directions.

791 We use the same definition of directionality index to compute the directionality of the grid cells in Vector-HaSH,  
792 shown in Fig. S19.



## 793 References

- 794 1. Proust, M. *À la recherche du temps perdu* (1913).
- 795 2. Milner, B. The medial temporal-lobe amnesic syndrome. *Psychiatr. Clin. North Am.* **28**, 599–611, 609 (2005).
- 796 3. Reed, J. M. & Squire, L. R. Impaired recognition memory in patients with lesions limited to the hippocampal  
797 formation. *Behav. neuroscience* **111**, 667 (1997).
- 798 4. Zola, S. M. *et al.* Impaired recognition memory in monkeys after damage limited to the hippocampal region. *J.*  
799 *Neurosci.* **20**, 451–463 (2000).
- 800 5. Manns, J. R., Hopkins, R. O., Reed, J. M., Kitchener, E. G. & Squire, L. R. Recognition memory and the  
801 human hippocampus. *Neuron* **37**, 171–180 (2003).
- 802 6. O’Keefe, J. & Dostrovsky, J. The hippocampus as a spatial map: preliminary evidence from unit activity in the  
803 freely-moving rat. *Brain research* (1971).
- 804 7. Nadel, L. & O’Keefe, J. The hippocampus as a cognitive map (1978).
- 805 8. Taube, J. S., Muller, R. U. & Ranck, J. B. Head-direction cells recorded from the postsubiculum in freely  
806 moving rats. i. description and quantitative analysis. *J. Neurosci.* **10**, 420–435 (1990).
- 807 9. Wilson, M. A. & McNaughton, B. L. Dynamics of the hippocampal ensemble code for space. *Science* **261**,  
808 1055–1058 (1993).
- 809 10. Wilson, M. A. & McNaughton, B. L. Reactivation of hippocampal ensemble memories during sleep. *Science*  
810 **265**, 676–679 (1994).
- 811 11. Lee, A. K. & Wilson, M. A. Memory of sequential experience in the hippocampus during slow wave sleep.  
812 *Neuron* **36**, 1183–1194 (2002).
- 813 12. Hyman, J. M., Wyble, B. P., Goyal, V., Rossi, C. A. & Hasselmo, M. E. Stimulation in hippocampal region ca1  
814 in behaving rats yields long-term potentiation when delivered to the peak of theta and long-term depression  
815 when delivered to the trough. *J. Neurosci.* **23**, 11725–11731 (2003).
- 816 13. Hafting, T., Fyhn, M., Molden, S., Moser, M.-B. & Moser, E. I. Microstructure of a spatial map in the  
817 entorhinal cortex. *Nature* **436**, 801–806 (2005).
- 818 14. Ji, D. & Wilson, M. A. Coordinated memory replay in the visual cortex and hippocampus during sleep. *Nat.*  
819 *neuroscience* **10**, 100–107 (2007).
- 820 15. Hassabis, D., Kumaran, D., Vann, S. D. & Maguire, E. A. Patients with hippocampal amnesia cannot imagine  
821 new experiences. *Proc. Natl. Acad. Sci.* **104**, 1726–1731 (2007).
- 822 16. Solstad, T., Boccara, C. N., Kropff, E., Moser, M.-B. & Moser, E. I. Representation of geometric borders in  
823 the entorhinal cortex. *Science* **322**, 1865–1868 (2008).
- 824 17. Fenton, A. A. *et al.* Unmasking the ca1 ensemble place code by exposures to small and large environments:  
825 more place cells and multiple, irregularly arranged, and expanded place fields in the larger space. *J. Neurosci.*  
826 **28**, 11250–11262 (2008).
- 827 18. Moser, E. I., Kropff, E. & Moser, M.-B. Place cells, grid cells, and the brain’s spatial representation system.  
828 *Annu. Rev. Neurosci.* **31**, 69–89 (2008).
- 829 19. Lever, C., Burton, S., Jeewajee, A., O’Keefe, J. & Burgess, N. Boundary vector cells in the subiculum of the  
830 hippocampal formation. *J. Neurosci.* **29**, 9771–9777 (2009).
- 831 20. Colgin, L. L. *et al.* Frequency of gamma oscillations routes flow of information in the hippocampus. *Nature*  
832 **462**, 353–357 (2009).
- 833 21. Stensola, H. *et al.* The entorhinal grid map is discretized. *Nature* **492**, 72–78 (2012).

- 834 **22.** Bonnevie, T. *et al.* Grid cells require excitatory drive from the hippocampus. *Nat. neuroscience* **16**, 309–317  
835 (2013).
- 836 **23.** Buzsáki, G. & Moser, E. I. Memory, navigation and theta rhythm in the hippocampal-entorhinal system. *Nat.*  
837 *neuroscience* **16**, 130–138 (2013).
- 838 **24.** Kraus, B. J., Robinson, R. J., White, J. A., Eichenbaum, H. & Hasselmo, M. E. Hippocampal “time cells”:  
839 time versus path integration. *Neuron* **78**, 1090–1101 (2013).
- 840 **25.** Krupic, J., Bauza, M., Burton, S., Barry, C. & O’Keefe, J. Grid cell symmetry is shaped by environmental  
841 geometry. *Nature* **518**, 232–235 (2015).
- 842 **26.** Høydal, Ø. A., Skytøen, E. R., Andersson, S. O., Moser, M.-B. & Moser, E. I. Object-vector coding in the  
843 medial entorhinal cortex. *Nature* **568**, 400–404 (2019).
- 844 **27.** Marr, D., Willshaw, D. & McNaughton, B. *Simple memory: a theory for archicortex* (Springer, 1991).
- 845 **28.** Skaggs, W., Knierim, J., Kudrimoti, H. & McNaughton, B. A model of the neural basis of the rat’s sense of  
846 direction. *Adv. neural information processing systems* **7** (1994).
- 847 **29.** Burgess, N., Recce, M. & O’Keefe, J. A model of hippocampal function. *Neural networks* **7**, 1065–1081  
848 (1994).
- 849 **30.** McClelland, J. L., McNaughton, B. L. & O’Reilly, R. C. Why there are complementary learning systems in  
850 the hippocampus and neocortex: insights from the successes and failures of connectionist models of learning  
851 and memory. *Psychol. review* **102**, 419 (1995).
- 852 **31.** Blum, K. I. & Abbott, L. F. A model of spatial map formation in the hippocampus of the rat. *Neural*  
853 *computation* **8**, 85–93 (1996).
- 854 **32.** Hartley, T., Burgess, N., Lever, C., Cacucci, F. & O’keefe, J. Modeling place fields in terms of the cortical  
855 inputs to the hippocampus. *Hippocampus* **10**, 369–379 (2000).
- 856 **33.** Burak, Y. & Fiete, I. R. Accurate path integration in continuous attractor network models of grid cells. *PLoS*  
857 *computational biology* **5**, e1000291 (2009).
- 858 **34.** Yoon, K. *et al.* Specific evidence of low-dimensional continuous attractor dynamics in grid cells. *Nat.*  
859 *neuroscience* **16**, 1077–1084 (2013).
- 860 **35.** Trettel, S. G., Trimper, J. B., Hwaun, E., Fiete, I. R. & Colgin, L. L. Grid cell co-activity patterns during sleep  
861 reflect spatial overlap of grid fields during active behaviors. *Nat. Neurosci.* **22**, 609–617 (2019).
- 862 **36.** Gardner, R. J. *et al.* Toroidal topology of population activity in grid cells. *Nature* **602**, 123–128 (2022).
- 863 **37.** Derdikman, D., Knierim, J. J. *et al.* Space, time and memory in the hippocampal formation. Tech. Rep.,  
864 Springer.
- 865 **38.** O’Reilly, R. C., Bhattacharyya, R., Howard, M. D. & Ketz, N. Complementary learning systems. *Cogn.*  
866 *science* **38**, 1229–1248 (2014).
- 867 **39.** Bush, D., Barry, C., Manson, D. & Burgess, N. Using grid cells for navigation. *Neuron* **87**, 507–520 (2015).
- 868 **40.** Hardcastle, K., Ganguli, S. & Giocomo, L. M. Environmental boundaries as an error correction mechanism for  
869 grid cells. *Neuron* **86**, 827–839 (2015).
- 870 **41.** Moser, M.-B., Rowland, D. C. & Moser, E. I. Place cells, grid cells, and memory. *Cold Spring Harb.*  
871 *perspectives biology* **7**, a021808 (2015).
- 872 **42.** Dordek, Y., Soudry, D., Meir, R. & Derdikman, D. Extracting grid cell characteristics from place cell inputs  
873 using non-negative principal component analysis. *Elife* **5**, e10094 (2016).
- 874 **43.** Stachenfeld, K. L., Botvinick, M. M. & Gershman, S. J. The hippocampus as a predictive map. *Nat.*  
875 *neuroscience* **20**, 1643–1653 (2017).

- 876 **44.** Eichenbaum, H. On the integration of space, time, and memory. *Neuron* **95**, 1007–1018 (2017).
- 877 **45.** Keinath, A. T., Epstein, R. A. & Balasubramanian, V. Environmental deformations dynamically shift the grid  
878 cell spatial metric. *Elife* **7**, e38169 (2018).
- 879 **46.** Behrens, T. E. *et al.* What is a cognitive map? organizing knowledge for flexible behavior. *Neuron* **100**,  
880 490–509 (2018).
- 881 **47.** Banino, A. *et al.* Vector-based navigation using grid-like representations in artificial agents. *Nature* **557**,  
882 429–433 (2018).
- 883 **48.** Ocko, S. A., Hardcastle, K., Giocomo, L. M. & Ganguli, S. Emergent elasticity in the neural code for space.  
884 *Proc. Natl. Acad. Sci.* **115**, E11798–E11806 (2018).
- 885 **49.** Chaudhuri, R., Gerçek, B., Pandey, B., Peyrache, A. & Fiete, I. The intrinsic attractor manifold and population  
886 dynamics of a canonical cognitive circuit across waking and sleep. *Nat. neuroscience* **22**, 1512–1520 (2019).
- 887 **50.** Agmon, H. & Burak, Y. A theory of joint attractor dynamics in the hippocampus and the entorhinal cortex  
888 accounts for artificial remapping and grid cell field-to-field variability. *Elife* **9**, e56894 (2020).
- 889 **51.** Whittington, J. C. *et al.* The tolmán-eichenbaum machine: unifying space and relational memory through  
890 generalization in the hippocampal formation. *Cell* **183**, 1249–1263 (2020).
- 891 **52.** Uria, B. *et al.* The spatial memory pipeline: a model of egocentric to allocentric understanding in mammalian  
892 brains. *BioRxiv* 2020–11 (2020).
- 893 **53.** Sanders, H., Wilson, M. A. & Gershman, S. J. Hippocampal remapping as hidden state inference. *Elife* **9**,  
894 e51140 (2020).
- 895 **54.** George, D. *et al.* Clone-structured graph representations enable flexible learning and vicarious evaluation of  
896 cognitive maps. *Nat. communications* **12**, 2392 (2021).
- 897 **55.** Whittington, J. C., McCaffary, D., Bakermans, J. J. & Behrens, T. E. How to build a cognitive map. *Nat.*  
898 *neuroscience* **25**, 1257–1272 (2022).
- 899 **56.** Scoville, W. B. & Milner, B. Loss of recent memory after bilateral hippocampal lesions. *J. neurology,*  
900 *neurosurgery, psychiatry* **20**, 11 (1957).
- 901 **57.** Penfield, W. & Milner, B. Memory deficit produced by bilateral lesions in the hippocampal zone. *AMA*  
902 *archives Neurol. & Psychiatry* **79**, 475–497 (1958).
- 903 **58.** Milner, B., Corkin, S. & Teuber, H.-L. Further analysis of the hippocampal amnesic syndrome: 14-year  
904 follow-up study of hm. *Neuropsychologia* **6**, 215–234 (1968).
- 905 **59.** O’Keefe, J. & Dostrovsky, J. The hippocampus as a spatial map. preliminary evidence from unit activity in the  
906 freely-moving rat. *Brain Res.* **34**, 171–175 (1971).
- 907 **60.** Moser, E. I., Kropff, E. & Moser, M.-B. Place cells, grid cells, and the brain’s spatial representation system.  
908 *Annu. Rev. Neurosci.* **31**, 69–89 (2008).
- 909 **61.** Hafting, T., Fyhn, M., Molden, S., Moser, M.-B. & Moser, E. I. Microstructure of a spatial map in the  
910 entorhinal cortex. *Nature* **436**, 801–806 (2005).
- 911 **62.** Yoon, K. *et al.* Specific evidence of low-dimensional continuous attractor dynamics in grid cells. *Nat. Neurosci.*  
912 **16**, 1077–1084 (2013).
- 913 **63.** Trettel, S. G., Trimper, J. B., Hwaun, E., Fiete, I. R. & Colgin, L. L. Grid cell co-activity patterns during sleep  
914 reflect spatial overlap of grid fields during active behaviors. *Nat. Neurosci.* **22**, 609–617 (2019).
- 915 **64.** Gardner, R. J., Lu, L., Wernle, T., Moser, M.-B. & Moser, E. I. Correlation structure of grid cells is preserved  
916 during sleep. *Nat. Neurosci.* **22**, 598–608 (2019).
- 917 **65.** O’Keefe, J. & Nadel, L. *The hippocampus as a cognitive map* (Oxford University Press, Oxford, 1978).

- 918 **66.** Buzsáki, G. & Tingley, D. Space and time: the hippocampus as a sequence generator. *Trends cognitive sciences*  
919 **22**, 853–869 (2018).
- 920 **67.** Aronov, D., Nevers, R. & Tank, D. W. Mapping of a non-spatial dimension by the hippocampal–entorhinal  
921 circuit. *Nature* **543**, 719–722 (2017).
- 922 **68.** Killian, N. J., Potter, S. M. & Buffalo, E. A. Saccade direction encoding in the primate entorhinal cortex  
923 during visual exploration. *Proc. Natl. Acad. Sci.* **112**, 15743–15748 (2015).
- 924 **69.** Constantinescu, A. O., O’Reilly, J. X. & Behrens, T. E. J. Organizing conceptual knowledge in humans with a  
925 gridlike code. *Science* **352**, 1464–1468 (2016).
- 926 **70.** Eichenbaum, H. Is the rodent hippocampus just for ‘place’? *Curr. Opin. Neurobiol.* **6**, 187–195 (1996).
- 927 **71.** Eichenbaum, H. What versus where: Non-spatial aspects of memory representation by the hippocampus. *Curr.*  
928 *Top. Behav. Neurosci.* **37**, 101–117 (2018).
- 929 **72.** Whittington, J. C. R. *et al.* The Tolman–Eichenbaum machine: Unifying space and relational memory through  
930 generalization in the hippocampal formation. *Cell* **183**, 1249–1263.e23 (2020).
- 931 **73.** Neupane, S., Fiete, I. R. & Jazayeri, M. Vector production via mental navigation in the entorhinal cortex.  
932 *bioRxiv* 2022–12 (2022).
- 933 **74.** Gardner, E. The space of interactions in neural network models. *J. Phys. A Math. Gen.* **21**, 257–270 (1988).
- 934 **75.** Abu-Mostafa, Y. S. & St Jacques, J. Information capacity of the hopfield model. *IEEE Trans. Inf. Theory* **31**,  
935 461–464 (1985).
- 936 **76.** Krotov, D. & Hopfield, J. Large associative memory problem in neurobiology and machine learning. *arXiv*  
937 *preprint arXiv:2008.06996* (2020).
- 938 **77.** Witter, M. P. & Groenewegen, H. J. Laminar origin and septotemporal distribution of entorhinal and perirhinal  
939 projections to the hippocampus in the cat. *J. Comp. Neurol.* **224**, 371–385 (1984).
- 940 **78.** Amaral, D. G. & Witter, M. P. The three-dimensional organization of the hippocampal formation: a review of  
941 anatomical data. *Neuroscience* **31**, 571–591 (1989).
- 942 **79.** Witter, M. P. & Amaral, D. G. Entorhinal cortex of the monkey: V. projections to the dentate gyrus,  
943 hippocampus, and subicular complex. *J. Comp. Neurol.* **307**, 437–459 (1991).
- 944 **80.** Witter, M. P., Doan, T. P., Jacobsen, B., Nilssen, E. S. & Ohara, S. Architecture of the entorhinal cortex a  
945 review of entorhinal anatomy in rodents with some comparative notes. *Front. Syst. Neurosci.* **11**, 46 (2017).
- 946 **81.** Stensola, H. *et al.* The entorhinal grid map is discretized. *Nature* **492**, 72–78 (2012).
- 947 **82.** Fiete, I. R., Burak, Y. & Brookings, T. What grid cells convey about rat location. *J. Neurosci.* **28**, 6858–6871  
948 (2008).
- 949 **83.** Sreenivasan, S. & Fiete, I. Grid cells generate an analog error-correcting code for singularly precise neural  
950 computation. *Nat. Neurosci.* **14**, 1330–1337 (2011).
- 951 **84.** Hopfield, J. J. Neurons with graded response have collective computational properties like those of two-state  
952 neurons. *Proc. Natl. Acad. Sci. U. S. A.* **81**, 3088–3092 (1984).
- 953 **85.** Brun, V. H. *et al.* Place cells and place recognition maintained by direct entorhinal-hippocampal circuitry.  
954 *Science* **296**, 2243–2246 (2002).
- 955 **86.** Radhakrishnan, A., Belkin, M. & Uhler, C. Overparameterized neural networks implement associative memory.  
956 *Proc. Natl. Acad. Sci.* **117**, 27162–27170 (2020).
- 957 **87.** Sharma, S., Chandra, S. & Fiete, I. Content addressable memory without catastrophic forgetting by heteroas-  
958 sociation with a fixed scaffold. In *International Conference on Machine Learning*, 19658–19682 (PMLR,  
959 2022).



- 960 **88.** Rajasethupathy, P. *et al.* Projections from neocortex mediate top-down control of memory retrieval. *Nature*  
961 **526**, 653–659 (2015).
- 962 **89.** Eichenbaum, H. Prefrontal–hippocampal interactions in episodic memory. *Nat. Rev. Neurosci.* **18**, 547–558  
963 (2017).
- 964 **90.** Simons, J. S. & Spiers, H. J. Prefrontal and medial temporal lobe interactions in long-term memory. *Nat.*  
965 *reviews neuroscience* **4**, 637–648 (2003).
- 966 **91.** Tapson, J. & van Schaik, A. Learning the pseudoinverse solution to network weights. *Neural Networks* **45**,  
967 94–100 (2013).
- 968 **92.** O’Reilly, R. C. Six principles for biologically based computational models of cortical cognition. *Trends*  
969 *cognitive sciences* **2**, 455–462 (1998).
- 970 **93.** Personnaz, L., Guyon, I. & Dreyfus, G. Information storage and retrieval in spin-glass like neural networks. *J.*  
971 *de Physique Lettres* **46**, 359–365 (1985).
- 972 **94.** Personnaz, L., Guyon, I. & Dreyfus, G. Collective computational properties of neural networks: New learning  
973 mechanisms. *Phys. Rev. A* **34**, 4217 (1986).
- 974 **95.** Parisi, G. A memory which forgets. *J. Phys. A: Math. Gen.* **19**, L617 (1986).
- 975 **96.** Fusi, S. & Abbott, L. Limits on the memory storage capacity of bounded synapses. *Nat. neuroscience* **10**,  
976 485–493 (2007).
- 977 **97.** Tsodyks, M. V. & Feigel’man, M. V. The enhanced storage capacity in neural networks with low activity level.  
978 *EPL (Europhysics Lett.)* **6**, 101 (1988).
- 979 **98.** Dominguez, D., Koroutchev, K., Serrano, E. & Rodríguez, F. B. Information and topology in attractor neural  
980 networks. *Neural computation* **19**, 956–973 (2007).
- 981 **99.** Chaudhuri, R. & Fiete, I. Bipartite expander hopfield networks as self-decoding high-capacity error correcting  
982 codes. In Wallach, H. *et al.* (eds.) *Advances in Neural Information Processing Systems*, vol. 32 (2019).
- 983 **100.** Alme, C. B. *et al.* Place cells in the hippocampus: eleven maps for eleven rooms. *Proc. Natl. Acad. Sci. U. S.*  
984 *A.* **111**, 18428–18435 (2014).
- 985 **101.** Burak, Y. & Fiete, I. R. Accurate path integration in continuous attractor network models of grid cells. *PLoS*  
986 *Comput. Biol.* **5**, e1000291 (2009).
- 987 **102.** Klukas, M. *et al.* Fragmented spatial maps: State abstraction and efficient planning from surprisal. *bioRxiv*  
988 (2021).
- 989 **103.** Whittington, M., Traub, R., Kopell, N., Ermentrout, B. & Buhl, E. Inhibition-based rhythms: experimental and  
990 mathematical observations on network dynamics. *Int. J. Psychophysiol.* **38**, 315–336 (2000).
- 991 **104.** Sanders, H., Wilson, M. A. & Gershman, S. J. Hippocampal remapping as hidden state inference. *Elife* **9**  
992 (2020).
- 993 **105.** Kleinfeld, D. & Sompolinsky, H. Associative neural network model for the generation of temporal patterns.  
994 theory and application to central pattern generators. *Biophys. J.* **54**, 1039–1051 (1988).
- 995 **106.** Herz, A. V., Li, Z. & Van Hemmen, J. Statistical mechanics of temporal association in neural networks with  
996 transmission delays. *Phys. review letters* **66**, 1370 (1991).
- 997 **107.** Fiete, I. R., Senn, W., Wang, C. Z. H. & Hahnloser, R. H. R. Spike-time-dependent plasticity and heterosynaptic  
998 competition organize networks to produce long scale-free sequences of neural activity. *Neuron* **65**, 563–576  
999 (2010).
- 1000 **108.** Hertz, J. A., Krogh, A. & Palmer, R. G. *Introduction to the theory of neural computation.*, vol. 1 of *The*  
1001 *advanced book program* (Addison-Wesley, 1991).

- 1002 **109.** Klukas, M., Lewis, M. & Fiete, I. Efficient and flexible representation of higher-dimensional cognitive variables  
1003 with grid cells. *PLoS Comput. Biol.* **16**, e1007796 (2020).
- 1004 **110.** Wood, E. R., Dudchenko, P. A., Robitsek, R. J. & Eichenbaum, H. Hippocampal neurons encode information  
1005 about different types of memory episodes occurring in the same location. *Neuron* **27**, 623–633 (2000).
- 1006 **111.** Grieves, R. M., Wood, E. R. & Dudchenko, P. A. Place cells on a maze encode routes rather than destinations.  
1007 *Elife* **5**, e15986 (2016).
- 1008 **112.** Dombeck, D. A., Harvey, C. D., Tian, L., Looger, L. L. & Tank, D. W. Functional imaging of hippocampal  
1009 place cells at cellular resolution during virtual navigation. *Nat. neuroscience* **13**, 1433–1440 (2010).
- 1010 **113.** Markus, E. J. *et al.* Interactions between location and task affect the spatial and directional firing of hippocampal  
1011 neurons. *J. Neurosci.* **15**, 7079–7094 (1995).
- 1012 **114.** Bird, C. M. & Burgess, N. The hippocampus and memory: insights from spatial processing. *Nat. reviews*  
1013 *neuroscience* **9**, 182–194 (2008).
- 1014 **115.** Nadel, L. & Moscovitch, M. Memory consolidation, retrograde amnesia and the hippocampal complex. *Curr.*  
1015 *opinion neurobiology* **7**, 217–227 (1997).
- 1016 **116.** Yates, F. A. *The Art of Memory* (1966).
- 1017 **117.** unknown, A. *Rhetorica ad herennium* (~80 B.C.).
- 1018 **118.** Cicero. *De oratore* (55 B.C.).
- 1019 **119.** Quintilian. *Institutio oratoria* (~95 A.D.).
- 1020 **120.** Maguire, E. A., Valentine, E. R., Wilding, J. M. & Kapur, N. Routes to remembering: the brains behind  
1021 superior memory. *Nat. neuroscience* **6**, 90–95 (2003).
- 1022 **121.** Ericsson, K. A. *et al.* Memory skills mediating superior memory in a world-class memorist. *Memory* **25**,  
1023 1294–1302 (2017).
- 1024 **122.** Qureshi, A., Rizvi, F., Syed, A., Shahid, A. & Manzoor, H. The method of loci as a mnemonic device to  
1025 facilitate learning in endocrinology leads to improvement in student performance as measured by assessments.  
1026 *Adv. physiology education* **38**, 140–144 (2014).
- 1027 **123.** Reggente, N., Essoe, J. K., Baek, H. Y. & Rissman, J. The method of loci in virtual reality: explicit binding of  
1028 objects to spatial contexts enhances subsequent memory recall. *J. Cogn. Enhancement* **4**, 12–30 (2020).
- 1029 **124.** Sousa, A. E., Mahdid, Y., Brodeur, M. & Lepage, M. A feasibility study on the use of the method of loci  
1030 for improving episodic memory performance in schizophrenia and non-clinical subjects. *Front. Psychol.* **12**,  
1031 612681 (2021).
- 1032 **125.** Krotov, D. & Hopfield, J. J. Dense associative memory for pattern recognition. *Adv. neural information*  
1033 *processing systems* **29**, 1172–1180 (2016).
- 1034 **126.** Ramsauer, H. *et al.* Hopfield networks is all you need. *arXiv preprint arXiv:2008.02217* (2020).
- 1035 **127.** Hasselmo, M. E. A model of episodic memory: mental time travel along encoded trajectories using grid cells.  
1036 *Neurobiol. learning memory* **92**, 559–573 (2009).
- 1037 **128.** Agmon, H. & Burak, Y. A theory of joint attractor dynamics in the hippocampus and the entorhinal cortex  
1038 accounts for artificial remapping and grid cell field-to-field variability. *Elife* **9** (2020).
- 1039 **129.** Benna, M. K. & Fusi, S. Place cells may simply be memory cells: Memory compression leads to spatial tuning  
1040 and history dependence. *Proc. Natl. Acad. Sci.* **118**, e2018422118 (2021).
- 1041 **130.** Sharma, S., Curtis, A., Kryven, M., Tenenbaum, J. & Fiete, I. Map induction: Compositional spatial submap  
1042 learning for efficient exploration in novel environments. *ICLR* (2022).

- 1043 **131.** Tsoi, S. Y. *et al.* Telencephalic outputs from the medial entorhinal cortex are copied directly to the hippocampus.  
1044 *Elife* **11**, e73162 (2022).
- 1045 **132.** Sipser, M. & Spielman, D. A. Expander codes. *IEEE transactions on Inf. Theory* **42**, 1710–1722 (1996).
- 1046 **133.** Demircigil, M., Heusel, J., Löwe, M., Upgang, S. & Vermet, F. On a model of associative memory with huge  
1047 storage capacity. *J. Stat. Phys.* **168**, 288–299 (2017).
- 1048 **134.** Dragoi, G. & Tonegawa, S. Preplay of future place cell sequences by hippocampal cellular assemblies. *Nature*  
1049 **469**, 397–401 (2011).
- 1050 **135.** Dresler, M. *et al.* Mnemonic training reshapes brain networks to support superior memory. *Neuron* **93**,  
1051 1227–1235 (2017).
- 1052 **136.** Yim, M. Y., Sadun, L. A., Fiete, I. R. & Taillefumier, T. Place-cell capacity and volatility with grid-like inputs.  
1053 *Elife* **10**, e62702 (2021).
- 1054 **137.** <https://www.kaggle.com/datasets/whitemoon/miniimagenet>.

## 1055 **A Supplementary Information**

1056 This SI is structured as follows: First, we present the quantification metrics and tools used to generate the numerical  
1057 results presented in this paper in SI Sec. **B**. Then, in SI Sec. **C-D**, we provide theoretical guarantees of the results  
1058 about Vector-HaSH, first in SI Sec. **C** focusing on the grid-hippocampal memory scaffold and in SI Sec. **D** focusing  
1059 on heteroassociative learning with the sensory cells. In particular, in SI Sec. **C** we prove that the setup of the memory  
1060 scaffold described in the main text results in a network with an exponentially large number of robust fixed points  
1061 with large basins of attraction. Then, in SI Sec. **D**, we first demonstrate that heteroassociative pseudoinverse learning  
1062 will result in a memory continuum with the desired properties, and then show that one may feasibly replace the  
1063 pseudoinverse learning with simpler Hebbian learning and continue to obtain qualitatively similar results.

## 1064 **B Quantification Metrics**

### 1065 **B.1 Software and Data**

1066 The source code for the models presented in this paper will be made available at the following GitHub repository  
1067 upon acceptance:

1068 <https://github.com/FieteLab/>

### 1069 **B.2 Mutual Information**

1070 In this Appendix, unless otherwise specified, we use  $s_i^\mu$  to represent the  $i^{\text{th}}$  bit of the  $\mu^{\text{th}}$  pattern stored in the network,  
1071 and  $\sigma_i$  to represent the  $i^{\text{th}}$  bit of the pattern recovered by the network. Here we primarily consider the case of random  
1072 patterns such that bits of  $s^\mu$  are independently sampled from i.i.d. random variables. This allows us to calculate  
1073 information theoretic quantities for a single bit, and then scale the calculation by the pattern length to obtain the  
1074 corresponding quantities for entire patterns.

1075 Further, for simplicity of notation in this section, we overload  $\sigma$  and  $s$  to also represent the random variables  
1076 from which the stored patterns and recovered patterns are being sampled.

1077 We characterize the quality of pattern recovery by a network through the *mutual information* between stored  
1078 patterns  $s$  and recovered patterns  $\sigma$ . For discrete random variables, the mutual information can be quantified as:

$$1079 \quad MI(\sigma; s) = H(\sigma) - H(\sigma|s), \quad (27)$$

where  $H(\sigma)$  is the information entropy of the recovered pattern  $\sigma$ ,

$$1080 \quad H(\sigma) = - \sum_{\sigma} P(\sigma) \log P(\sigma) \quad (28)$$

and  $H(\sigma|s)$  is the conditional entropy of the recovered pattern given the stored pattern  $s$ ,

$$H(\sigma|s) = -\sum_s \sum_{\sigma} P(\sigma, s) \log P(\sigma|s). \quad (29)$$

1079 As we now show in the following sections, the mutual information can be explicitly computed for dense and  
1080 sparse random binary patterns.

### 1081 **B.2.1 Dense binary patterns**

For unbiased random binary  $\{-1, 1\}$  patterns,

$$H(\sigma) = -\frac{1}{2} \log\left(\frac{1}{2}\right) - \frac{1}{2} \log\left(\frac{1}{2}\right) = 1.$$

Further, since we assumed that each bit is independent, we obtain

$$P(\sigma|s) = (1 + m\sigma s)/2, \quad (30)$$

where  $m$  is the overlap between the stored and recovered pattern,  $m = \frac{1}{N} \sum_i \sigma_i s_i$ <sup>98</sup>. Using Eq. (29), this can be used to obtain

$$H(\sigma|s) = -\frac{1}{2} \left( \frac{1+m}{2} \log \frac{1+m}{2} + \frac{1-m}{2} \log \frac{1-m}{2} \right) - \frac{1}{2} \left( \frac{1-m}{2} \log \frac{1-m}{2} + \frac{1+m}{2} \log \frac{1+m}{2} \right) \quad (31)$$

$$= -\frac{1+m}{2} \log\left(\frac{1+m}{2}\right) - \frac{1-m}{2} \log\left(\frac{1-m}{2}\right). \quad (32)$$

Following Eq. (27) we thus obtain

$$MI(\sigma; s) = 1 + \frac{1+m}{2} \log\left(\frac{1+m}{2}\right) + \frac{1-m}{2} \log\left(\frac{1-m}{2}\right) \quad (33)$$

### 1082 **B.2.2 Sparse binary patterns**

1083 For sparse binary  $\{0, 1\}$  patterns, let  $p$  denote the fraction of “1” bits in the stored pattern (i.e., the average activity of  
1084 the stored pattern). Let the average activity of the recovered pattern be denoted as  $q = \sum_i \sigma_i / N$ .

Let  $P_{1e}$  be the probability of error in a bit of  $\sigma$  if the corresponding bit of  $s$  is 1, and  $P_{0e}$  be the error probability in a bit of  $\sigma$  if the corresponding bit of  $s$  is 0. Then,

$$H(\sigma) = -[q \log(q) + (1-q) \log(1-q)] \quad (34)$$

$$H(\sigma|s) = -p[P_{1e} \log(P_{1e}) + 1 - P_{1e} \log(1 - P_{1e})] - (1-p)[P_{0e} \log(P_{0e}) + 1 - P_{0e} \log(1 - P_{0e})] \quad (35)$$

$$(36)$$

To obtain the probabilities  $P_{1e}$  and  $P_{0e}$ , we compute the overlap  $m$  and the average activity of the recovered pattern  $q$  in terms of these probabilities as

$$m = (1/N) \sum_i \sigma_i s_i = p(1 - P_{1e}), \quad (37)$$

$$q = \sum_i \sigma_i / N = p(1 - P_{1e}) + (1-p)P_{0e} = m + (1-p)P_{0e}. \quad (38)$$

These equations can then be solved to obtain

$$P_{1e} = 1 - m/p, \quad (39)$$

$$P_{0e} = \frac{q - m}{1 - p}, \quad (40)$$

1085 which can then be used to compute  $MI(\sigma; s)$  using Eq. (27).



### 1086 **B.2.3 Continuous random normal patterns**

The calculation of mutual information so far has been restricted to the case of discrete binarized patterns. For continuous valued patterns (as in Fig. 3), entropy is ill-defined via Eq. (28). Instead, in this case we can define the differential entropy as

$$h(X) = - \int_{-\infty}^{\infty} \phi(x) \log \phi(x) dx = \mathbb{E}[-\log \phi(x)], \quad (41)$$

1087 where  $\phi(x)$  is the probability density function of the random variable  $X$ .

For random continuous patterns with patterns are sampled from a normal distribution with zero mean and unit variance, this gives

$$h(X) = \log \sqrt{2\pi e}. \quad (42)$$

The conditional entropy can similarly be calculated as

$$h(X) = \log \sqrt{2\pi e(1-r^2)}, \quad (43)$$

where  $r$  is the correlation coefficient between  $X$  and  $Y$ . This can be used to obtain the mutual information

$$MI(X;Y) = \log \sqrt{\frac{1}{1-r^2}} \quad (44)$$

1088 Thus in the case of random normal patterns the mutual information between the stored pattern  $s$  and the recovered  
1089 pattern  $\sigma$  can be computed directly through the correlation between them using Equation 44 above.

## 1090 **B.3 Metrics**

1091 We quantify the recovery error, i.e., the error between the stored pattern and the recovered pattern in the network by  
1092 computing the  $L^2$  norm of the difference between stored and recovered patterns. This recovery error is then used to  
1093 quantitatively apply a recovery threshold to ascertain the capacity of the memory scaffold.

1094 After choosing a recovery threshold (see *Methods*), the capacity of the network is defined as the largest number  
1095 of stored patterns for which the average recovery error across patterns is below threshold.

## 1096 **C Theoretical Results on the Memory Scaffold**

1097 First, we prove that the memory scaffold network has  $\prod_{i=1}^M \lambda_i^2$  fixed points, while having only  $\mathcal{O}(M \sum_i \lambda_i^2)$  synapses,  
1098 establishing an exponentially large number of fixed points. Then, we demonstrate that each of these basins are  
1099 maximally large, and finally demonstrate that these basins are convex, ensuring robustness of basins and protection  
1100 against adversarial input.

### 1101 **C.1 Justification for the exponentially large capacity of the memory scaffold**

1102 We first provide broad qualitative justification for why the memory scaffold as constructed in Vector-HaSH is capable  
1103 of storing such a large number of fixed points, then present a mathematical proof in a simplified setting. In this  
1104 subsection, for ease of notation, we denote the number of phases in the  $i^{\text{th}}$  grid module,  $\lambda_i^2$ , as  $l_i$ .

1105 Unlike associative memory in the usual context of random patterns (as in the random shuffled hippocampal  
1106 states considered in Figs. 2d,f and 3d), note that the hippocampal states are determined by a random projection of  
1107 the structured grid states. As a result, the predefined hippocampal states inherit similar pattern-pattern correlations  
1108 as the predefined grid cell states. This allows for Hebbian learning to act more efficiently in learning pairwise  
1109 correlation resulting in a high capacity. Indeed, while in Hopfield networks any given fixed point is destabilized due  
1110 to interference from other fixed points (resulting in catastrophic forgetting when a large number of fixed points have  
1111 been memorized), the shared pattern-pattern correlations in the memory scaffold result in the interference terms

1112 being positively correlated with each fixed point (which also leads to the scaffold generalization properties Fig. 2f,  
1113 Sec. C.4).

To show this result more quantitatively, recall that

$$g(t+1) = \text{CAN}[W_{gh}h(t)]. \quad (45)$$

1114 where  $\text{CAN}[x]$  is a nonlinear function that acts independently on each module of grid cells, such that  $\text{CAN}[x]$  will be  
1115 a vector with exactly one element set to “1” in each of the  $l_i$  indices corresponding to each module. and all other  
1116 elements set to “0”. Further, the element set to 1 in a given module corresponds to the same index as the largest  
1117 element  $x$  within that module.

1118 Corresponding to the state  $h^\mu$ , consider the pattern  $h(t) = h^\mu + \zeta$ , where  $\zeta$  represents a random noise vector.  
1119 For simplicity, we assume that  $\zeta$  is a continuous-valued vector whose each component is drawn independently from  
1120 a normal distribution with zero mean and variance  $\varepsilon^2$ .

From  $h(t)$ , we aim to recover  $g(t+1) = g^\mu$  via the mapping  $W_{gh}$ . For ease of notation, we denote the prespecified  
random projection  $W_{hg}$  as  $W$ .

$$h^\mu = \Phi[Wg^\mu], \quad (46)$$

1121 where  $\Phi$  represents the neural transfer function for the grid to hippocampal synapses, which we implement as a  
1122 thresholded rectifying function (see *Methods*). We implement  $W$  such that each element is independently sampled  
1123 from a prespecified distribution (see *Methods*). Without loss of generality, we can assume that this distribution  
1124 has zero mean and unit variance, since any transformations of the mean and variance can be absorbed into the  
1125 nonlinearity  $\Phi$ .

Now, from the definition of  $W_{gh}$  and  $h^\mu$ ,

$$g(t+1) = \text{CAN}[GH^T(\Phi(Wg^\mu) + \zeta)], \quad (47)$$

$$= \text{CAN}[L\Phi(G^TW^T)\Phi(Wg^\mu)/N_h + G\Phi(G^TW^T)\zeta/N_h], \quad (48)$$

1126 where we have added a scaling factor  $1/N_h$  that leaves the CAN continuous attractor dynamics unchanged, but will  
1127 be useful for normalization of random variables later in our calculation.

For analytic simplicity, we make the assumption that the nonlinearity  $\Phi$  in the above equation can be ignored.  
While this is a gross simplification, the obtained results are broadly consistent with the numerical observations in  
Fig. 2. This approximates the above equation to

$$g(t+1) = \text{CAN}[GG^TW^TWg^\mu/N_h + GG^TW^T\zeta/N_h] = \text{CAN}[Ag^\mu + Z], \quad (49)$$

1128 where  $A = (GG^T)(W^TW/N_h)$ , and  $Z = GG^TW^T\zeta/N_h$ .

1129 Since each element of the  $N_h \times N_g$  matrix  $W$  was drawn independently from a normal distribution with unit  
1130 variance,  $W^TW$  (and hence  $A$ ) can be treated as a matrix random variable. Under the distribution of the matrix  
1131 random variable  $A$  and the vector random variable  $Z$  we will compute the probability of  $g(t+1) = g^\mu$ . Note that this  
1132 simplification of the problem into Eq. (49) has fundamentally relied on Eq. (46), which establishes hippocampal  
1133 states as being derived from random projections of grid states. Qualitatively, hippocampal states being projections of  
1134 grid states results in a similarity of state-state relationships between grid states and hippocampal states. As a result,  
1135 overloading the scaffold network weights with a large number of patterns will not result in loss of previously stored  
1136 information through interference; instead, pattern interference will re-inforce previously stored patterns (which  
1137 also results in the strong generalization property, Sec. C.4). In contrast, if the hippocampal states were arbitrarily  
1138 determined (such as through consideration of random sparse vectors, or sensory-input-dependent vectors), then  
1139 interference due to storage of additional patterns would result in catastrophic forgetting, as in classic Hopfield  
1140 memory.

We first focus on the structure of the matrix  $GG^T$ . This matrix will have a block structure, with the sizes of the blocks determined by the number of phases in each grid module,  $l_i$ . In particular we write  $GG^T$  as

$$GG^T = \begin{pmatrix} \Gamma_{11} & \Gamma_{12} & \dots \\ \Gamma_{21} & \Gamma_{22} & \dots \\ \vdots & & \ddots \end{pmatrix}, \quad (50)$$

with each  $\Gamma_{ij}$  being a submatrix of size  $l_i \times l_j$ . From the structure of the grid code matrix  $G$ , it follows that

$$\Gamma_{ii} = \left( \prod_{k \neq i} l_k \right) \mathbb{I} = \gamma_{ii} \mathbb{I} \quad (51)$$

and

$$\Gamma_{ij} = \left( \prod_{k \neq i, j} l_k \right) \mathbf{1} = \gamma_{ij} \mathbf{1}, \quad (52)$$

1141 where  $\mathbb{I}$  is an appropriately sized identity matrix, and  $\mathbf{1}$  is an appropriately sized matrix with each element equal to 1.  
 1142 This can be shown by noting that  $GG^T = \sum_{\mu} g^{\mu} (g^{\mu})^T$ , and that each  $g^{\mu} (g^{\mu})^T$  will be a matrix with a single nonzero  
 1143 element equal to 1 in each  $\Gamma$  block of  $GG^T$ .

1144 We now compute the distribution of the matrix random variable  $W^T W$ . As argued above, each element of the  
 1145  $N_h \times N_g$  matrix  $W$  can be assumed to be drawn independently from a distribution with zero mean and unit variance.  
 1146 As is justified later, we can assume that these elements are drawn from a normal distribution in particular, since we  
 1147 shall be applying central limit theorem which will wash away particulars of the shape of the distribution.

Thus  $W^T W$  can thus be approximated to have each diagonal element distributed as the sum of the squares of  $N_h$  standard normal variables, and each off-diagonal element distributed as the sum of the products of  $N_h$  pairs of uncorrelated standard normal variables. Thus

$$W^T W \sim \begin{pmatrix} \chi^2(N_h) & \mathcal{NP}(N_h) & \dots \\ \mathcal{NP}(N_h) & \chi^2(N_h) & \dots \\ \vdots & & \ddots \end{pmatrix}, \quad (53)$$

1148 where  $\chi^2(N)$  is the sum of  $N$  i.i.d.  $\chi^2$  distributions, and  $\mathcal{NP}(N)$  is the sum of  $N$  i.i.d. normal product distributions  
 1149 (i.e., the distribution of the product of two i.i.d. standard normal variables). Note that we have suppressed the indices  
 1150 on each matrix element, however it should be noted that each element is an independent sample from the distribution  
 1151 and are identical in distribution but not in value.

1152 In the large  $N_h$  limit, each of these matrix elements is the sum of a large number of random variables and can  
 1153 hence be approximated as a normal distribution due to central limit theorem. Thus,  $\chi^2(N_h) \sim \mathcal{N}(N_h, 2N_h)$ , and  
 1154  $\mathcal{NP}(N_h) \sim \mathcal{N}(0, N_h)$ , where  $\mathcal{N}(\mu, \sigma^2)$  is a normal distribution with mean  $\mu$  and variance  $\sigma^2$ .<sup>3</sup>

We thus treat  $W^T W/N_h$  as a matrix random variable with elements on the diagonal being drawn from a distribution  $\mathcal{D}$ , having unit mean and a variance of  $2/N_h$ ; and elements on the off-diagonal being drawn from a distribution  $\mathcal{O}$ , having zero mean and  $1/N_h$  variance. For ease of calculation, we write this matrix as having a block structure similar to  $GG^T$ , given by

$$W^T W/N_h = \begin{pmatrix} w_{11} & w_{12} & \dots \\ w_{21} & w_{22} & \dots \\ \vdots & & \ddots \end{pmatrix}, \quad (54)$$

<sup>3</sup>Had we not earlier assumed that elements of  $W$  are drawn from a normal distribution we would have arrived at this same result with different intermediate distribution instead of  $\chi^2$  and  $\mathcal{NP}$

1155 with  $w_{ij}$  being an  $l_i \times l_j$  matrix such that  $w_{ii}$  has diagonal entries drawn from  $\mathcal{D}$  and off diagonal entries drawn from  
 1156  $\mathcal{O}$ , and  $w_{ij}$  for  $i \neq j$  being a matrix with all entries drawn from  $\mathcal{O}$

1157 We can now compute the distribution of the elements of  $A$ . The matrix  $A$  will have a similar block structure to  
 1158  $GG^T$ ,

$$A = GG^T W^T W / N_h \quad (55)$$

$$= \begin{pmatrix} A_{11} & A_{12} & \dots \\ A_{21} & A_{22} & \dots \\ \vdots & & \ddots \end{pmatrix}, \quad (56)$$

with

$$A_{ij} = \sum_k \Gamma_{ik} w_{kj}. \quad (57)$$

1159 Since each  $w_{ij}$  consists of elements drawn from random normal distributions, the distribution of the matrix variables  
 1160  $A_{ij}$  can be exactly computed through sums of random normal variables. Even without explicit computation, we  
 1161 can ascertain certain properties of  $A$  given the symmetry of grid states across module-preserving permutations. In  
 1162 particular,  $A_{ii}$  will be a matrix random variable with diagonal element drawn from an i.i.d. distribution  $\mathcal{A}_{ii}^d$ , and each  
 1163 off-diagonal element drawn from a different i.i.d. distribution  $\mathcal{A}_{ii}^o$ . In contrast,  $A_{ij}$  for  $i \neq j$  will have all elements  
 1164 drawn from an i.i.d. distribution  $\mathcal{A}_{ij}$ .

We first consider  $A_{ii}$ .

$$A_{ii} = \sum_k \Gamma_{ik} w_{ki} \quad (58)$$

$$= \Gamma_{ii} w_{ii} + \sum_{k \neq i} \Gamma_{ik} w_{ki} \quad (59)$$

$$= \gamma_{ii} \begin{pmatrix} \mathcal{D} & \mathcal{O} & \dots \\ \mathcal{O} & \mathcal{D} & \dots \\ \vdots & & \ddots \end{pmatrix} + \gamma_{ik} \begin{pmatrix} \sum_{l_k \text{ terms}} \mathcal{O} & \sum_{l_k \text{ terms}} \mathcal{O} & \dots \\ \sum_{l_k \text{ terms}} \mathcal{O} & \sum_{l_k \text{ terms}} \mathcal{O} & \dots \\ \vdots & & \ddots \end{pmatrix}, \quad (60)$$

where we have omitted subscripts on individual random variables for simplicity, but it should be noted that each random variable is i.i.d., including the summands in the above expressions. Thus,

$$\mathcal{A}_{ii}^d \sim \gamma_{ii} \mathcal{D} + \sum_{k \neq i} \gamma_{ik} \sum_{l_k \text{ terms}} \mathcal{O} \quad (61)$$

$$\mathcal{A}_{ii}^o \sim \gamma_{ii} \mathcal{O} + \sum_{k \neq i} \gamma_{ik} \sum_{l_k \text{ terms}} \mathcal{O}. \quad (62)$$

A similar calculation can be done to obtain

$$\mathcal{A}_{ij} \sim \gamma_{ij} \mathcal{O} + \gamma_{ij} \left( \mathcal{D} + \sum_{l_j - 1 \text{ terms}} \mathcal{O} \right) + \sum_{k \neq i, j} \gamma_{ik} \sum_{l_k \text{ terms}} \mathcal{O}. \quad (63)$$

From the same symmetry as in  $A$ , we can also argue that elements of  $Z$  can also be split into a similar block structure,  $Z^T = (Z_1^T Z_2^T \dots)^T$ , with all  $\lambda_i^2$  elements of  $Z_i$  drawn from an i.i.d distribution  $\mathcal{Z}_i$ . More specifically,  $Z = GG^T W^T \zeta / N_h$ . First note that  $W^T \zeta$  will be a random vector with each element constructed from the sum of  $N_h$  i.i.d. normal product distributions multiplied by the scale of  $\zeta$ , i.e.,  $\epsilon$ . Thus  $W^T \zeta / N_h$  is identically distributed to  $\epsilon \mathcal{O}$ . Left multiplying this vector with  $GG^T$  we obtain in the  $i^{\text{th}}$  subvector

$$\mathcal{Z}_i = \epsilon \left[ \gamma_{ii} \mathcal{O} + \sum_{j \neq i} \gamma_{ij} \sum_{l_j \text{ terms}} \mathcal{O} \right], \quad (64)$$



1165 where again we have omitted subscripts on individual random variables for simplicity.

Let the mean and standard deviation of  $\mathcal{A}_{ii}^d$ ,  $\mathcal{A}_{ii}^o$ ,  $\mathcal{A}_{ij}$  and  $\mathcal{Z}_i$  be denoted as  $\mu_{Ad_{ii}}, \sigma_{Ad_{ii}}$ ;  $\mu_{Ao_{ii}}, \sigma_{Ao_{ii}}$ ;  $\mu_{A_{ij}}, \sigma_{A_{ij}}$ ; and  $\mu_{Z_i}, \sigma_{Z_i}$  respectively. Since  $\mathcal{D} \sim \mathcal{N}(1, 2/N_h)$  and  $\mathcal{O} \sim \mathcal{N}(0, 1/N_h)$ , we obtain

$$\mu_{Ad_{ii}} = \gamma_{ii} \quad (65)$$

$$\sigma_{Ad_{ii}}^2 = \left[ 2\gamma_{ii}^2 + \sum_{k \neq i} l_k \gamma_{ik}^2 \right] / N_h \quad (66)$$

$$\mu_{Ao_{ii}} = 0 \quad (67)$$

$$\sigma_{Ao_{ii}}^2 = \left[ \gamma_{ii}^2 + \sum_{k \neq i} l_k \gamma_{ik}^2 \right] / N_h \quad (68)$$

$$\mu_{A_{ij}} = \gamma_{ij} \quad (69)$$

$$\sigma_{A_{ij}}^2 = \left[ \gamma_{ii}^2 + \gamma_{ij}^2 (2 + (l_j - 1)) + \sum_{k \neq i, j} l_k \gamma_{ik}^2 \right] / N_h \quad (70)$$

$$\mu_{Z_i} = 0 \quad (71)$$

$$\sigma_{Z_i}^2 = \varepsilon^2 \left[ \gamma_{ii}^2 + \sum_{j \neq i} l_j \gamma_{ij}^2 \right] / N_h \quad (72)$$

Next, we note the conditions on these blocks to make  $g(t+1) = g^\mu$ , the condition necessary for  $g^\mu$  to be a scaffold fixed point. Without loss of generality, we assume that  $g^\mu$  corresponds to the grid state such that each  $l_i$  length subvector of  $g^\mu$  has the first element set to 1 and all others set to zero. The  $i^{\text{th}}$  subvector of  $Ag^\mu + Z$  will then have the first element given by

$$\mathcal{A}_{ii}^d + \sum_{j \neq i} \mathcal{A}_{ij} + \mathcal{Z}_i, \quad (73)$$

and all other elements given by

$$\mathcal{A}_{ii}^o + \sum_{j \neq i} \mathcal{A}_{ij} + \mathcal{Z}_i. \quad (74)$$

For this module to be correctly reconstructed through the continuous attractor network dynamics, we require that the first element of the subvector to be larger than the others. Thus, the probability of the correct reconstruction is given by

$$P(g(t+1) = g^\mu) = P(\text{Eq. (73)} - \text{Eq. (74)} > 0). \quad (75)$$

As seen earlier, each of these random variables are being drawn from a normal distribution (due to central limit theorem in the limit of large  $N_h$ ). In terms of the parameters of these normal distributions, Eq. (75) can be written as

$$P(g(t+1) = g^\mu) = P(\mathcal{N}(\mu_{Ad_{ii}} - \mu_{Ao_{ii}}, \sigma_{Ad_{ii}}^2 + \sigma_{Ao_{ii}}^2 + 2 \sum_{j \neq i} \sigma_{A_{ij}}^2 + 2\sigma_{Z_i}^2) > 0). \quad (76)$$

For ease of notation, we define

$$\mu_{AZ} = \mu_{Ad_{ii}} - \mu_{Ao_{ii}}, \quad (77)$$

$$\sigma_{AZ}^2 = \sigma_{Ad_{ii}}^2 + \sigma_{Ao_{ii}}^2 + 2 \sum_{j \neq i} \sigma_{A_{ij}}^2 + 2\sigma_{Z_i}^2 \quad (78)$$

$$(79)$$

such that the right-hand side of Eq. (76) is equal to  $P(\mathcal{N}(\mu_{AZ}, \sigma_{AZ}^2) > 0)$ . This can then be computed as

$$P(l(t+1) = l^\mu) = \frac{1}{2} \left[ 1 + \operatorname{erf} \left( \frac{\mu_{AZ}}{\sigma_{AZ} \sqrt{2}} \right) \right]. \quad (80)$$

The above-derived expressions for the terms in  $\mu_{AZ}$  and  $\sigma_{AZ}$  can be simplified to

$$\mu_{AZ} = \gamma_{ii} \quad (81)$$

and

$$N_h \sigma_{AZ}^2 = \gamma_{ii}^2 (2M+1) + (2M+1) \sum_{k \neq i} l_k \gamma_{ik}^2 + 2 \sum_{j \neq i} \gamma_{ij}^2. \quad (82)$$

Recall that  $\gamma_{ii} = P/l_i$  and  $\gamma_{ij} = P/(l_i l_j)$ , for  $P = \prod_i l_i$ . Thus, the ratio  $\mu_{AZ}^2 / \sigma_{AZ}^2$  simplifies to

$$\frac{\mu_{AZ}^2}{\sigma_{AZ}^2} = \frac{N_h}{2M+1 + (2M+2) \sum_{k \neq i} (1/l_k) + 2 \sum_{k \neq i} (1/l_k^2) + 2\epsilon^2 [1 + \sum_{k \neq i} (1/l_k)]} \quad (83)$$

Inverting the obtained expression allows for computation of  $N_h^*$ ,

$$N_h^* = c \left[ 2M+1 + (2M+2) \sum_{k \neq i} \frac{1}{l_k} + 2 \sum_{k \neq i} \frac{1}{l_k^2} + 2\epsilon^2 \left( 1 + \sum_{k \neq i} \frac{1}{l_k} \right) \right], \quad (84)$$

1166 where  $c = 2 [\operatorname{erf}^{-1}(1-2P)]^2$  and  $P$  is the threshold selected for accuracy of the recovered pattern. This allows  
 1167 us to estimate the critical number of hippocampal cells (as a function of the number of grid cell modules,  $M$ , the  
 1168 period of the modules  $l_i = \lambda_i^2$ , and the input noise  $\epsilon$ ) beyond which the hippocampal memory scaffold stores all  
 1169 grid-hippocampal states as fixed points.

1170 If the number of grid cells far exceeds the number of modules (as would be expected<sup>81</sup>), then  $\lambda_k \gg M$  and  
 1171 thus  $l_k \gg M^2$  and the summands in Eq. (84) can all be ignored. This makes  $N_h^*$  asymptotically independent of the  
 1172 grid periods, and is given by  $N_h^* \approx c(2M+1+2\epsilon^2)$ . This can be seen qualitatively in Fig. 2, where for a fixed  $M$ ,  
 1173 the critical number of hippocampal cells  $N_h^*$  approaches a constant with increasing  $N_g$  (and hence increasing  $l_k$ ).  
 1174 Moreover, if  $\epsilon \ll 1$  and  $M \gg 1$ , then  $N_h^* = \mathcal{O}(M)$ . This has been verified qualitatively in Fig. 2, where  $N_h^*$  increases  
 1175 linearly with increasing number of modules  $M$ . Note that due to the simplifications necessary for this analytic  
 1176 result,  $N_h^*$  obtained from Eq. (84) are not directly comparable to numerics in Fig. 2, however the above-mentioned  
 1177 qualitative trends all seem to hold.

1178 These results thus demonstrate a crucial property of the hippocampal memory scaffold network — it has  
 1179  $\mathcal{O}(N_g N_h^*) = \mathcal{O}(M \sum_k \lambda_k^2) \sim \mathcal{O}(M^2 \lambda^2)$  synapses while having  $\prod_k \lambda_k^2 \sim \lambda^{2M}$  fixed points. Thus, the number of fixed  
 1180 points grows exponentially faster than the number of synapses in the network, resulting in the network being useful  
 1181 as a memory scaffold as in MESH<sup>87</sup>.

## 1182 C.2 Memory Scaffold has Maximally Sized Basins of Attraction

1183 Due to the symmetries in grid code, we argue here that the memory scaffold in Vector-HaSH has no spurious fixed  
 1184 points, and has convex, maximally sized basins of attraction that are equal in volume.

1185 First, we note that as a result of the CAN dynamics in the grid layer (cf. Eq. (4)), the only possible grid states  
 1186 are the  $\prod_i K_i$  modular one-hot states. Correspondingly, the hippocampal states (determined by random projections of  
 1187 the grid states) must then also be one of the  $\prod_i K_i$  states, establishing that no spurious fixed points can arise.

1188 Thus, the union of the basins about each of the predefined fixed points of the grid-hippocampal scaffold cover  
 1189 the entire space  $\mathbb{R}^{N_h}$ . Note next that each  $h^\mu$  are equivalent, i.e., there is no special  $\mu$  since each  $g^\mu$  is equivalent up  
 1190 to a module-preserving permutation of bits and  $h^\mu$  are determined by a random projection of  $g^\mu$ . Thus,  $\mathbb{R}^{N_h}$  must be  
 1191 partitioned into basins with equal volume that are maximally large (and hence are of the same volume as the Voronoi  
 1192 cell about these fixed points).

### 1193 C.3 Convexity of Scaffold Basins

1194 The existence of maximally sized equi-volumed basins around each predefined scaffold fixed point, as we have  
 1195 shown, is not sufficient to guarantee robustness to noise. A large basin could in principle have some boundaries  
 1196 that come arbitrarily close to the fixed points – such a situation holds for instance when a system is susceptible to  
 1197 adversarial inputs, where a very small perturbation of the input leads to a very different classification as an output.  
 1198 Noise robustness requires a second condition, that of basin convexity. Here we demonstrate that the obtained basins  
 1199 are convex, and thus the large basins must result in basin boundaries that are well separated from the fixed points  
 1200 themselves.

1201 We are interested in the basins in the space  $\mathbb{R}^{N_h}$ : the hippocampus receives sensory input from the sensory  
 1202 layer, mediating the recall of scaffold states. Thus, noise robustness will hence be required there. The broad idea  
 1203 of the proof is as follows: first, we demonstrate that perturbations in the hippocampal latent space are equivalent  
 1204 to considering real-valued perturbations with small magnitudes in the grid-cell layer latent space. Then we show  
 1205 that the continuous attractor dynamics on grid cells result in convex basins in the grid-cell space, which directly  
 1206 translates to convex basins in the hippocampal space.

Consider a hippocampal population vector given by a small perturbation to a predefined hippocampal state fixed  
 point  $h^\mu$ , which we denote as  $h = h^\mu + \varepsilon$ . Let  $\delta$  denote the magnitude of the perturbation  $\varepsilon$ . This hippocampal state  
 is projected onto the grid cells through  $W_{gh}$  to obtain  $\bar{g}$  before the continuous attractor dynamics, where

$$\bar{g} = W_{gh}h = W_{gh}[h^\mu + \varepsilon] \quad (85)$$

$$= \bar{g}^\mu + W_{gh}\varepsilon. \quad (86)$$

1207 Note that  $W_{gh}\varepsilon$  will have a magnitude of approximately  $\delta$  times the magnitude of  $\bar{g}^\mu$ , and further, the nonzero  
 1208 elements of  $\varepsilon$  are uncorrelated with  $h^\mu$ , and hence  $W_{gh}\varepsilon$  can be treated as an independent small real-valued  
 1209 perturbation to  $\bar{g}^\mu = W_{gh}h^\mu$ .

1210 If we can now show that the continuous attractor dynamics on grid cells has a convex basin, that would indicate  
 1211 that all points near  $g^\mu$  map to  $g^\mu$ , and since points near  $h^\mu$  map to points near  $g^\mu$ , this would imply convexity of  
 1212 basins in  $p$ -space.

1213 The symmetry of the grid code implies that it will suffice to show that the basin about any one fixed point is  
 1214 convex. Without loss of generality, we choose the fixed point  $g^\mu$  as the grid population vector with the first bit in  
 1215 each module set to 1 and all other  $\sum_i \lambda_i^2 - M$  bits set to 0. Let  $x$  and  $y$  be two vectors within the continuous attractor  
 1216 dynamics of  $g^\mu$ , i.e.,  $CAN[x] = CAN[y] = g^\mu$ . Thus, for the  $k^{\text{th}}$  module,  $x_{k;1} > x_{k;i}$  and  $y_{k;1} > y_{k,i}$  for  $i > 1$ . Adding  
 1217 the two inequalities with coefficients  $a$  and  $(1 - a)$ , we obtain  $ax_{k;1} + (1 - a)y_{k;1} > ax_{k;i} + (1 - a)y_{k,i}$  for all  $i > 1$   
 1218 for  $0 \leq a \leq 1$ . Thus, continuous attractor dynamics (which enforce modular winner-take-all dynamics) map the  $k^{\text{th}}$   
 1219 module of  $ax + (1 - a)y$  to the  $k^{\text{th}}$  module of  $g^\mu$ . Since this holds for all  $k$ , thus  $CAN[ax + (1 - a)y] = g^\mu$ . Hence,  
 1220 for any two vectors  $x$  and  $y$  in the basin of  $g^\mu$ , all vectors on the line from  $x$  to  $y$  also lie in this basin. By definition,  
 1221 this makes the basin of  $g^\mu$ , and as argued earlier this imposes convexity of basins in the hippocampal cell space.

### 1222 C.4 Scaffold weights can be learned on a vanishing fraction of all states

1223 As shown in Fig. 2, when the hippocampus-to-grid cell synaptic weights ( $W_{gh}$ ) are learned on a small number of grid  
 1224 states, the scaffold is able to generalize: all grid states become stable fixed points of the scaffold dynamics. Thus  
 1225 an animal only needs to traverse small regions in space after which the grid-hippocampal scaffold is recurrently  
 1226 stabilized for all other states. Here we show that in the large  $N_h$  limit, it will suffice to train on only  $M \times \lambda_{max}^2$   
 1227 patterns for stabilization of the complete scaffold, where  $\lambda_{max}$  is the largest period of any grid module.

Similar to Sec. C.1, we make the grossly simplified assumption that the nonlinearities in the hippocampus can  
 be ignored. The grid cell state would then evolve as

$$g(t + 1) = CAN[GG^T W^T W g^\mu / N_h], \quad (87)$$

1228 where again we add an  $1/N_h$  scaling factor that renders the continuous attractor network dynamics unchanged. For  
 1229  $g^\mu$  to be a fixed point of the recurrent scaffold dynamics, we thus require that  $g(t + 1)$  be equal to  $g^\mu$ . Unlike Sec.

1230 **C.1**, we assume here that  $G$  is the matrix constructed by appending grid cell population vectors over only the first  
 1231  $N_{patts}$  number of states (rather than over the entirety of scaffold states).

As argued earlier in Sec. **C.1**, for large  $N_h$ , the matrix  $W^T W / N_h$  can be considered to be a random variable with i.i.d  $\mathcal{N}(1, 2/N_h)$  random variables on the diagonal, and i.i.d  $\mathcal{N}(0, 1/N_h)$  entries on the off-diagonal. In the limit of  $N_h \rightarrow \infty$ , these distributions tend to Dirac delta distributions we can thus treat  $W^T W / N_h$  as simply being an identity matrix. Thus, in this limit, it suffices to examine the scaffold fixed points under the dynamics

$$g(t+1) = \text{CAN}[GG^T g^v]. \quad (88)$$

As earlier, we write  $GG^T$  as a block matrix

$$GG^T = \begin{pmatrix} \Gamma_{11} & \Gamma_{12} & \dots \\ \Gamma_{21} & \Gamma_{22} & \dots \\ \vdots & & \ddots \end{pmatrix}, \quad (89)$$

1232 with each  $\Gamma_{ij}$  being a submatrix of size  $\lambda_i^2 \times \lambda_j^2$ . We define a construct a sequence of patterns  $g^\mu$  as follows: let the  
 1233 first pattern  $g^1$  be such that the first element in each  $\lambda_i^2$  subvector is set to one, and all other elements set to zero.  
 1234 Then, each successive pattern shifts the active element by one, modulo the total number of elements in the subvector  
 1235  $\lambda_i^2$ . Mapped to real space, this corresponds to the sequence of locations shown in Fig. **S12a** (*top left*). As we will  
 1236 now show, setting  $W_{gh}$  based on only  $M \times \lambda_{max}^2$  grid patterns will suffice to stabilize all patterns.

Note that

$$GG^T = \sum_{\mu=1}^{N_{patts}} g^\mu (g^\mu)^T. \quad (90)$$

1237 Each  $\mu$  term of this summation,  $g^\mu (g^\mu)^T$  will be a matrix with exactly one ‘1’ in each block  $\Gamma_{ij}$ , at the location  $(\mu$   
 1238  $\text{mod } \lambda_i^2, \mu \text{ mod } \lambda_j^2)$ , and will be zero everywhere else.

1239 For  $i \neq j$ , the periods  $\lambda_i$  and  $\lambda_j$  are coprime. In this case, we can see that if  $g^\mu$  and  $g^v$  contribute a ‘1’ at the  
 1240 same location  $(m, n)$  in  $\Gamma_{ij}$  then  $\mu - v$  must be a multiple of  $\lambda_i^2 \lambda_j^2$ . This can be seen since  $m = \mu \text{ mod } \lambda_i^2$ , thus  
 1241  $\mu = m \text{ mod } \lambda_i^2$ . Similarly  $v = m \text{ mod } \lambda_i^2$ , implying that  $\mu - v = 0 \text{ mod } \lambda_i^2$ . Similar reasoning leads to  $\mu - v = 0$   
 1242  $\text{mod } \lambda_j^2$  and thus  $\mu - v = 0 \text{ mod } \lambda_i^2 \lambda_j^2$ . Crucially, this means that if  $\mu \neq v$ , then  $\mu - v$  must be at least  $\lambda_i^2 \lambda_j^2$ ,  
 1243 which is equal to the number of elements in  $\Gamma_{ij}$ .

1244 Thus, if both  $\mu$  and  $v$  contribute a ‘1’ to  $(m, n)$  in  $\Gamma_{ij}$ , it must be that all other elements in  $\Gamma_{ij}$  have been  
 1245 increased by 1 due to patterns between  $\mu$  and  $v$ . In essence, elements of  $\Gamma_{ij}$  increase sequentially through increasing  
 1246 terms in the summation Eq. (90). Starting from all elements at zero before any learning, all patterns increase to 1  
 1247 one-at-a-time up to  $\lambda_i^2 \lambda_j^2$ , all patterns increase up to 2 through the next  $\lambda_i^2 \lambda_j^2$  patterns and so on. Crucially, at any  
 1248 point during learning, the largest element of  $\Gamma_{ij}$ , which we denote  $\max \Gamma_{ij}$ , can differ from the smallest element of  
 1249  $\Gamma_{ij}$ , which we denote  $\min \Gamma_{ij}$ , by at most 1.

1250 Next, we observe that for  $\Gamma_{ii}$ , the pattern  $\mu$  contributes a ‘1’ at the location  $(\mu \text{ mod } \lambda_i^2, \mu \text{ mod } \lambda_i^2)$ . This leads  
 1251 to two observations: first, that  $\Gamma_{ii}$  will have nonzero entries only on its diagonal; second, the smallest element on the  
 1252 diagonal will be  $\lfloor N_{patts} / \lambda_i^2 \rfloor$  and the largest element on the diagonal will be  $\lceil N_{patts} / \lambda_i^2 \rceil$ .

Now, consider the matrix  $GG^T$  constructed using Eq. (90), trained through the first  $N_{patts}$  patterns. We apply Eq. (88) for a given  $g^\mu$ , for  $\mu$  that need not be within  $\{1 \dots, N_{patts}\}$ . Note  $g^\mu$  has a 1 at only one location per module. Thus the  $i^{\text{th}}$  subvector of  $GG^T g^\mu$  can have values as small as  $\lfloor N_{patts} / \lambda_i^2 \rfloor + \sum_{j \neq i} \min \Gamma_{ij}$  at the index where  $g^\mu$  equals 1 in the  $i^{\text{th}}$  module; and, it can have values as large as  $\sum_{j \neq i} \max \Gamma_{ij}$  at the other entries. For this subvector to map to  $g^\mu$  under the continuous attractor network dynamics, we thus require

$$\lfloor N_{patts} / \lambda_i^2 \rfloor + \sum_{j \neq i} \min \Gamma_{ij} > \sum_{j \neq i} \max \Gamma_{ij}. \quad (91)$$



Thus,

$$\lfloor N_{patts} / \lambda_i^2 \rfloor > \sum_{j \neq i} (\max \Gamma_{ij} - \min \Gamma_{ij}) \quad (92)$$

$$\geq M - 1. \quad (93)$$

1253 Thus  $N_{patts} \geq M\lambda_i^2$ . Since the correct subvector needs to be recovered for all modules, thus  $N_{patts} \geq M\lambda_{max}^2$  for  
 1254 stabilization of *all* grid states  $g^\mu$  in the large  $N_h$  limit.

1255 Note that the proof above relies on the particular ordering of grid and hippocampal states described above. As  
 1256 we demonstrate, this ordering is optimal, and no other ordering of grid states can result in ‘faster’ generalization to  
 1257 all scaffold fixed points. To see this, note that we showed above that the particular ordering choice made ensures that  
 1258 the largest and smallest elements of  $\Gamma_{ij}$  can differ by at most 1. Moreover, this difference of at most one resulted in  
 1259 the generalization result proved above. Correspondingly, any other ordering that maintains this difference between  
 1260 the largest and smallest elements of  $\Gamma_{ij}$  will also demonstrate generalization to all scaffold states at  $N_{patts} \geq M\lambda_{max}^2$ .  
 1261 Faster generalization could only be possible if the elements of  $\Gamma_{ij}$  were all identical, leading to a difference of zero.  
 1262 This is however impossible, since the sum of elements in  $\Gamma_{ij}$  is equal to  $N_{patts}$ , which is increasing in steps of 1 and  
 1263 is thus not always divisible by the number of entries in  $\Gamma_{ij}$ , i.e.,  $\lambda_i^2 \times \lambda_j^2$ . Conversely, any other ordering, will result  
 1264 in a potentially larger difference between the smallest and largest elements of  $\Gamma_{ij}$ , which (following Eq. 92) will  
 1265 thus require a larger number of patterns to generalize to all scaffold states.

1266 However, as noted in Fig. 2g, other contiguous orderings of grid states result in generalization upon learning an  
 1267 approximately similar number ( $\mathcal{O}(M\lambda_{max}^2)$ ) of patterns.

## 1268 D Theoretical Results on Heteroassociative Learning

1269 Here we demonstrate that pseudoinverse learning first perfectly recovers the hippocampal states provided that  
 1270  $N_s > N_{patts}$  (in the noise-free case). Following the memory scaffold results proven earlier, reconstruction of the  
 1271 correct hippocampal states then results in correct retrieval of the corresponding label layer states. Next, we prove  
 1272 that for  $N_{patts} < N_h$ , the reconstructed feature layer states are also perfectly reconstructed, and for larger  $N_{patts}$  the  
 1273 overlap of the stored and recovered patterns decays gracefully as described in the main text. We then prove that  
 1274 given an ideal memory scaffold, heteroassociative *Hebbian* learning is also sufficient to obtain a memory scaffold  
 1275 with the same qualitative properties, with only a smaller prefactor on the memory capacity.

### 1276 D.1 Perfect Reconstruction of Hippocampal States Through Heteroassociative Pseudoinverse 1277 Learning

1278 The projection of the learned sensory inputs onto the hippocampus is given by  $W_{hs}S = HS^+S = H\Lambda_S$ , where  
 1279  $\Lambda_S = S^+S$  is an orthogonal projection operator onto the range of  $S^T$ . If  $N_s \geq N_{patts}$ ,  $S$  has linearly independent  
 1280 columns, and  $\Lambda_S = \mathbb{I}$ , the identity matrix. Thus,  $W_{hs}S = H$ , i.e., cueing any memorized patterns results in accurate  
 1281 reconstruction of the corresponding hippocampal scaffold state

1282 However, to examine Vector-HaSH as an associative memory, it is necessary to examine to reconstruction of the  
 1283 correct hippocampal scaffold state when cued with noisy or corrupted versions of the memorized patterns as well.  
 1284 Following the results of SI Sec. C.3 and C.2, we see that the memory scaffold has maximally large convex basins of  
 1285 attraction. Note that once  $W_{hs}$  has been trained with pseudo-inverse learning, the mapping from the sensory layer to  
 1286 the hippocampal layer is simply a linear transformation, that maps stored sensory patterns to their corresponding  
 1287 hippocampal scaffold states. Thus, the regions in sensory space that map to a given scaffold state must simply be a  
 1288 lower-to-higher-dimensional linear transformation of convex basins in the scaffold space about the chosen state.

1289 Hence, the basins of attraction for a given scaffold state must be convex regions in the sensory input state that  
 1290 include the sensory pattern that has been associated with that scaffold state.

## 1291 D.2 Perfect Reconstruction of $N_h$ Sensory States Through Heteroassociative Pseudoinverse Learn- 1292 ing

1293 To show that up to  $N_{patts} \leq N_h$  sensory inputs can be perfectly reconstructed through Vector-HaSH, we require that  
1294 the matrix of fixed point hippocampal states  $H$  be strongly full rank. While we do not rigorously prove that  $H$  is full  
1295 rank, we provide intuitive justification for the same. First note that  $\text{rank}(W_{hg}G) = \text{rank}(G) = N_G - M + 1$ <sup>136</sup>, which  
1296 does not need to be as large as  $N_h$ .

1297 Applying a thresholded rectifying function,  $H = \text{ReLU}[W_{hg}G - \Theta]$ , effectively acts as an independent random  
1298 perturbation to the elements of  $H$ . Assuming that these perturbations are truly random,  $H$  (and submatrices of  $H$   
1299 formed by selecting varied numbers of fixed points) will become full rank. This is numerically verified in Fig. S10,  
1300 where the rank can be seen to be  $\min(N_{patts}, N_h)$ .

1301 We can now show that the “knee” of the Vector-HaSH memory continuum must be at  $N_h$ , with  $N_{patts} \leq N_h$   
1302 sensory states being perfectly reconstructed.

1303 The projection of the hippocampus states onto the sensory layer is given by  $W_{sh}H = SH^+H = S\Lambda_H$ , where  
1304  $\Lambda_H = H^+H$  is an orthogonal projection operator onto the range of  $H^T$ . Since  $H$  is strongly full rank (as justified  
1305 above), thus for up to  $N_{patts} \leq N_h$ , the projection operator  $\Lambda_H$  will equal  $\mathbb{I}$ , the identity matrix. Thus  $W_{sh}P = S$ .

## 1306 D.3 Mutual information recalled in Vector-HaSH scales as $1/N_{patts}$

1307 Let  $\bar{s}^\mu$  be the reconstruction of pattern  $s^\mu$  in the feature layer before the application of the sign nonlinearity in Eq.  
1308 (12), i.e.,  $\bar{s}^\mu = W_{sh}h^\mu$ . Correspondingly, let  $\bar{S}$  be the matrix constructed with  $\bar{s}^\mu$  as its columns, i.e.,  $\bar{S}_{i\mu} = \bar{s}_i^\mu$ . In this  
1309 notation, we wish to prove that  $s^\mu \cdot \bar{s}^\mu / |s^\mu|^2 = N_h / N_{patts}$ .

1310 As earlier,  $\bar{S} = S\Lambda_P$ . Since  $N_{patts} > N_h$ ,  $\text{rank}(H) = N_h$ , and the projection operator  $\Lambda_H$  is thus no longer an identity  
1311 operator. Instead,  $\Lambda_H$  projects on to the  $N_h$ -dimensional hyperplane  $\mathcal{P}_H$  spanned by the rows of  $H$ . Notationally, let  
1312  $\bar{s}_i$  be the vector corresponding to the  $i^{\text{th}}$  row of  $\bar{S}$ , and similarly, let  $s_i$  be the vector corresponding to the  $i^{\text{th}}$  row of  $S$ .  
1313 In this notation, the vectors  $\bar{s}_i$  (i.e., the rows of  $\bar{S}$ ) are the vectors obtained by projecting  $s_i$  (i.e., the rows of  $S$ ) onto  
1314  $\mathcal{P}_H$ .

By construction  $s_i$  are  $N_{patts}$ -dimensional random vectors with no privileged direction. Thus,  $|s_i|^2$ , the squared  
magnitude along each dimension, will on average be equally divided across all dimensions. Hence, on average,  
the component of  $s_i$  projected onto  $\mathcal{P}_H$  (i.e.,  $\bar{s}_i$ ) will have a squared magnitude of  $N_h|s_i|^2/N_{patts}$  and thus  $|\bar{s}_i| =$   
 $|s_i| \sqrt{N_h/N_{patts}}$ . However,  $|\bar{s}_i|$  is also the cosine of the angle between  $s_i$  and the hyperplane  $\mathcal{P}_H$ , and hence averaged  
over  $i$ ,

$$s_i \cdot \bar{s}_i = |s_i| |\bar{s}_i| \sqrt{N_h/N_{patts}} = |s_i|^2 \sqrt{N_h/N_{patts}}. \quad (94)$$

Note that  $\sum_i (s_i \cdot \bar{s}_i) = \sum_\mu (s^\mu \cdot \bar{s}^\mu)$ , and  $\sum_i |s_i|^2 = \sum_\mu |s^\mu|^2$ . Thus the above equation can be rewritten as

$$\langle s^\mu \cdot \bar{s}^\mu \rangle_\mu = \langle |s^\mu|^2 \rangle_\mu \sqrt{N_h/N_{patts}}, \quad (95)$$

1315 where  $\langle \rangle_\mu$  denotes an average over all patterns  $\mu$ .

In the notation of Eq. 33, this gives  $m = \sqrt{N_h/N_{patts}}$ . In the limit of small  $m$ , note that  $\log(1+m) \approx m$ , and the  
right-hand side of Eq. 33 can simply be approximated in the asymptotic limit as

$$MI \approx m^2,$$

and thus mutual information scales as

$$MI \approx \frac{N_h}{N_{patts}} \quad (96)$$

1316 As a consequence of this result, note that since the mutual information is always positive and only smoothly  
1317 degrades 1 with increasing  $N_{patts}$ , thus the recovered state only gradually moves away from the true pattern in

1318 sensory space (cf. Fig. 3g). For random uncorrelated sensory patterns, the boundary of the Voronoi cell about a  
 1319 memorized pattern corresponds to the boundary at which no information is being recovered specific to one particular  
 1320 pattern. Thus, an always positive mutual information indicates that the recovered pattern always remains with the  
 1321 Voronoi cell corresponding to the true pattern, i.e., the recovered pattern is always closer to the correct patterns as  
 1322 compared to any other pattern.

#### 1323 **D.4 Space- and time-complexity of memory in Vector-HaSH**

1324 We show in SI Sec. D.1 that the number of sensory cells can scale as fast or faster than the maximal scaffold capacity  
 1325  $\mathcal{O}(K^M)$ . Thus,  $N_s \gg N_h, N_g$ , and thus the number of synapses in the model,  $\# \text{ synapses} = 2N_h(N_s + N_g) + M * K^2$   
 1326 is dominated by  $2N_s * N_h$ . Moreover, the number of hippocampal cells is asymptotically constant for large  $K$  at  
 1327 a fixed  $M$  (Fig. 2d right, SI Fig. S2), and thus the number of synapses scales as  $\mathcal{O}(N_s)$ . Further, the number of  
 1328 nodes,  $N_s + N_h + N_g$  also scales as  $\mathcal{O}(N_s)$ . Since the number of patterns perfectly reconstructed  $N_h$  is constant (with  
 1329 respect to the asymptotic scaling of the number of synapses at a fixed  $M$ ), the continuum in Vector-HaSH ranges  
 1330 from storing  $\mathcal{O}(1)$  patterns with  $\mathcal{O}(N_s) = \mathcal{O}(\# \text{ synapses})$  each, up to storing  $\mathcal{O}(N_s) = \mathcal{O}(\text{scaffold size})$  patterns  
 1331 with positive recovered information.

1332 The memory storage requirement for Vector-HaSH is equal to the number of synapses in the model, which  
 1333 as noted above scales as  $\mathcal{O}(N_s N_h)$ . This permits storage of  $N_h$  patterns perfectly, consisting of a total of  $N_s N_h$   
 1334 bits of information. Thus, as in Hopfield and Hopfield-like networks, the total information stored and recalled  
 1335 in Vector-HaSH scales as the number of synapses. The time complexity for perfect recovery of all  $\mathcal{O}(N_s N_h) =$   
 1336  $\mathcal{O}(\# \text{ synapses})$  bits of information scales as  $\mathcal{O}(N_s N_h^2) = \mathcal{O}((\# \text{ synapses})^{3/2} \sqrt{N_h/N_s}) \leq \mathcal{O}((\# \text{ synapses})^{3/2})$ . In  
 1337 contrast, for Hopfield and Hopfield-like networks, the time complexity for recovery of  $\mathcal{O}(\# \text{ synapses})$  scales as  
 1338  $\mathcal{O}((\# \text{ synapses})^{3/2})$ . Vector-HaSH thus has an asymptotically faster time complexity than Hopfield-like networks  
 1339 for recovery for the same number of total bits of information (when normalized by the number of synapses in the  
 1340 model).

1341 When the number of patterns stored is larger and scales with the number of sensory cells,  $cN_s$  for  $0 < c \leq 1$ ,  
 1342 Vector-HaSH partially recovers the stored information (Fig. 3). In this regime, Vector-HaSH has additionally  
 1343 improved time and space complexity as compared with the number of synapses: a space requirement of only  
 1344  $\mathcal{O}(\# \text{ synapses})$  and a time complexity of only  $\mathcal{O}(cN_s^2 N_h) = \mathcal{O}(c(\# \text{ synapses})^{3/2} \sqrt{N_s/N_h})$  is needed to store an input  
 1345 of  $\mathcal{O}(c(\# \text{ synapses}) \times (N_s/N_h))$  bits of information.

1346 The above scalings can also be reinterpreted in terms of the total information,  $I$ , stored in the networks (where  
 1347 for perfect recovery  $I = N_h N_s = \# \text{ synapses}$ , and for partial recovery  $I = cN_s^2 = c \times (\# \text{ synapses}) \times N_s/N_h$ ). For  
 1348 perfect recovery the space complexity requirements scale as  $I$ , and time complexity scales as  $I^{3/2} \sqrt{N_h/N_s}$ . For  
 1349 partial recovery the space complexity scales as  $IN_h/(cN_s)$ , and time complexity scales as  $I^{3/2} N_h/(N_s \sqrt{c})$ .

#### 1350 **D.5 One-Step Heteroassociation Leads to a Memory Continuum even with Hebbian Learning**

1351 The memory continuum in Vector-HaSH is a result of the one-step heteroassociation from the hidden to the feature  
 1352 layer, given a memory scaffold that perfectly recovers the hidden states. This holds irrespective of the nature of  
 1353 heteroassociation (pseudoinverse learning or Hebbian learning).

1354 Here we consider a simpler scenario where  $W_{sh}$  is trained through Hebbian learning and the hippocampal states  
 1355 are assumed to be correctly reconstructed (corresponding to pseudoinverse learning from  $S$  to  $H$ ).

We assume here that the sensory patterns being stored are random unbiased binary vectors drawn uniformly from  $\{-1, 1\}^{N_s}$ . If the weights from the hippocampal cells to the sensory inputs,  $W_{sh}$  are trained using Hebbian learning:

$$W_{sh} = (1/N_h) \sum_{\mu} s_i^{\mu} h_j^{\mu}. \quad (97)$$

To evaluate the accuracy of a recovered sensory state through this weight matrix, we estimate the probability that the  $i^{\text{th}}$  bit of  $s^V$  is recovered correctly. Since we assume in this simplified scenario that the hippocampal state  $p^V$  has

been correctly recovered:

$$\begin{aligned}
 s_i(t+1) &= \operatorname{sgn} \left[ \frac{1}{N_h} \sum_{j=1}^{N_h} \sum_{\mu=1}^{N_{patts}} s_i^\mu h_j^\mu h_j^\nu \right], \\
 &= \operatorname{sgn} \left[ s_i^\nu \left( \frac{1}{N_h} \sum_{j=1}^{N_h} h_j^\nu h_j^\nu \right) + \frac{1}{N_h} \sum_{\mu \neq \nu} \sum_j s_i^\mu h_j^\mu h_j^\nu \right].
 \end{aligned} \tag{98}$$

1356 Here we have separated the pattern  $\nu$  from all the other patterns. Next, we multiply the second term on the  
 1357 right-hand side by a factor  $f_i^\nu f_i^\nu = 1$ , and pull  $f_i^\nu$  out of the argument of the sign-function since  $f_i^\nu = \pm 1$ .

$$s_i(t+1) = s_i^\nu \operatorname{sgn} \left[ 1 + \frac{1}{N_h} \sum_{\mu \neq \nu} \sum_j s_i^\mu s_i^\nu h_j^\mu h_j^\nu \right] = s_i^\nu \operatorname{sgn}[1 - a_{i\nu}], \tag{99}$$

where

$$a_{i\nu} = -\frac{1}{N_h} \sum_{\mu \neq \nu} \sum_j s_i^\mu s_i^\nu h_j^\mu h_j^\nu \tag{100}$$

1358 Successful recovery of the  $i^{\text{th}}$  bit of  $s_\nu$  will occur if  $s_i(t+1) = s_i^\nu$ , which holds provided that  $a_{i\nu} > 1$ . The  
 1359 probability of an error in a given randomly chosen bit can thus be calculated as the probability that  $a_{i\nu} > 1$ .

1360 Since the sensory states were assumed to have been drawn uniformly from  $\{-1, 1\}^{N_s}$ , we can treat the product  
 1361  $s_i^\mu s_i^\nu$  as being  $+1$  or  $-1$  with equal probability. We assume that the distribution of hippocampal cell activity has mean  
 1362  $\mu_p$  and variance  $\sigma_p^2$ . Further, assuming that  $h_j^\mu$  and  $h_j^\nu$  can be treated as independent random variables, the product  
 1363  $h_j^\mu h_j^\nu$  would then have mean  $\tilde{\mu} = \mu_p^2$  and variance  $\tilde{\sigma}^2 = \sigma_p^4 + 2\sigma_p^2 \mu_p^2$ . Accounting for the random sign introduced  
 1364 by  $s_i^\mu s_i^\nu$ , the summand in Eq. (100) can then be treated as a random variable  $X$  with mean  $\tilde{\mu}$  and variance  $\tilde{\sigma}^2$  with  
 1365 probability 0.5, and mean  $-\tilde{\mu}$  and variance  $\tilde{\sigma}^2$  with probability 0.5. For large  $N_h$  and  $N_{patts}$ , we are summing over a  
 1366 large number of random variables — thus due to the Central Limit theorem, the precise details of the distribution  
 1367 will not matter, apart from an estimate of its mean and variance. By symmetry, the mean of  $X$  will be zero. This  
 1368 variance can be calculated to be  $\tilde{\sigma}^2 + \tilde{\mu}^2$ .

Summing over  $(N_{patts} - 1)N_h \approx N_{patts}N_h$  terms in Eq. (100), evaluated through central limit theorem, thus gives  
 a normal distribution, with zero mean, and variance  $(\tilde{\sigma}^2 + \tilde{\mu}^2)N_{patts}N_h$ . This gives

$$a_{i\nu} \sim \mathcal{N} \left( 0, \sigma^2 = \frac{N_{patts}}{N_h} (\tilde{\sigma}^2 + \tilde{\mu}^2) \right), \tag{101}$$

with

$$\tilde{\sigma}^2 = \sigma_p^4 + 2\sigma_p^2 \mu_p^2, \tag{102}$$

$$\tilde{\mu} = \mu_p^2. \tag{103}$$

$$\tag{104}$$

The probability of error in the activity state of neuron  $i$  is therefore given by:

$$P_{error} = \frac{1}{\sqrt{2\pi}\sigma} \int_1^\infty e^{-\frac{x^2}{2\sigma^2}} dx = \frac{1}{2} \left[ 1 - \operatorname{erf} \left( \sqrt{\frac{N_h}{2N_{patts}(\tilde{\sigma}^2 + \tilde{\mu}^2)}} \right) \right]. \tag{105}$$

1369 Thus the probability of error increases with the ratio  $N_{patts}/N_h$ . The mutual information between the stored and  
 1370 recovered Sensory States is then:

$$MI_{\text{perinbit}} = 1 + P_{\text{error}} \log P_{\text{error}} + (1 - P_{\text{error}}) \log(1 - P_{\text{error}}). \quad (106)$$

Since  $\text{erf}(x) \approx x$  and  $\log(1+x) \approx x$  for small  $x$ , in the limit of a large  $N_{\text{patts}}$  the above expression can be approximated to

$$MI_{\text{perinbit}} \approx \frac{N_h}{2N_{\text{patts}}(\tilde{\sigma}^2 + \tilde{\mu}^2)} \propto \frac{N_h}{N_{\text{patts}}}. \quad (107)$$

1371 This asymptotic scaling is verified in Fig. S6

## 1372 **D.6 Pseudoinverse learning of mappings from sensory states to velocities and memory palace** 1373 **items**

1374 Similar to pseudoinverse learning done from hippocampal cells to sensory cells, an exactly equivalent mathematical  
1375 theory applies for pseudoinverse learning from sensory cells to the one-hot representation of velocities associated  
1376 with each sensory state in 6 (see *Methods* for details of the learned velocity representations). In particular, as seen  
1377 in Sec. D.2, pseudoinverse learning of a matrix  $W_{yx}$  that maps from a layer  $X$  of dimensionality  $N_x$  to a layer  $Y$  of  
1378 dimensionality  $N_y$  is successful in exact recovery of all patterns in layer  $Y$  when learning up to  $\text{rank}(X)$  patterns. In  
1379 the case that  $\text{rank}(X) = N_x$ , as is the case when learning mappings from  $S$  to  $P$  and vice-versa (Sec. D.1, D.2), the  
1380 number of learned patterns that can be perfectly reconstructed is simply  $N_x$ .

1381 Thus, learning mappings from sensory cells to either velocity representations or memory palace task items  
1382 will be exactly successful for up to  $N_s$  velocities of memory palace items provided that the mappings are being  
1383 learned from patterns that form a full rank matrix. However, as seen in Fig. 6, mappings must be learned from  
1384 the reconstructed sensory states rather than the ground truth sensory states, since with increasing number of stored  
1385 patterns the reconstructed states deviate from the ground truth states.

1386 Thus, even if the sensory states form a full rank matrix, for successful mappings, it will be necessary that the  
1387 rank of the recovered sensory states must be  $N_s$ . Following the results presented in Sec. D.3, it would appear  
1388 that the the recovered sensory patterns would form a matrix of rank  $N_h$ , the dimensionality of the hyperplane  $\mathcal{P}_H$ .  
1389 However, this would only be the case if the recovered sensory states were obtained directly from  $W_{sh}H$  without any  
1390 additional nonlinearity. For the case of binary sensory states, the recovered sensory patterns are given by  $\text{sgn}[W_{sh}H]$ .  
1391 This sign nonlinearity in effect behaves like a small random perturbation to each of the  $N_s$  bits of  $W_{sh}H$ , rendering  
1392 the reconstructed sensory states to be full rank (assuming that the ground-truth sensory states matrix is full rank).  
1393 Thus, reconstruction of velocity mappings and memory palace task items (or indeed any other readout from sensory  
1394 the sensory cells) will be successful for up to  $N_s$  patterns, provided that the mappings are being learned from the  
1395 reconstructed sensory states (rather than the ground truth sensory states).



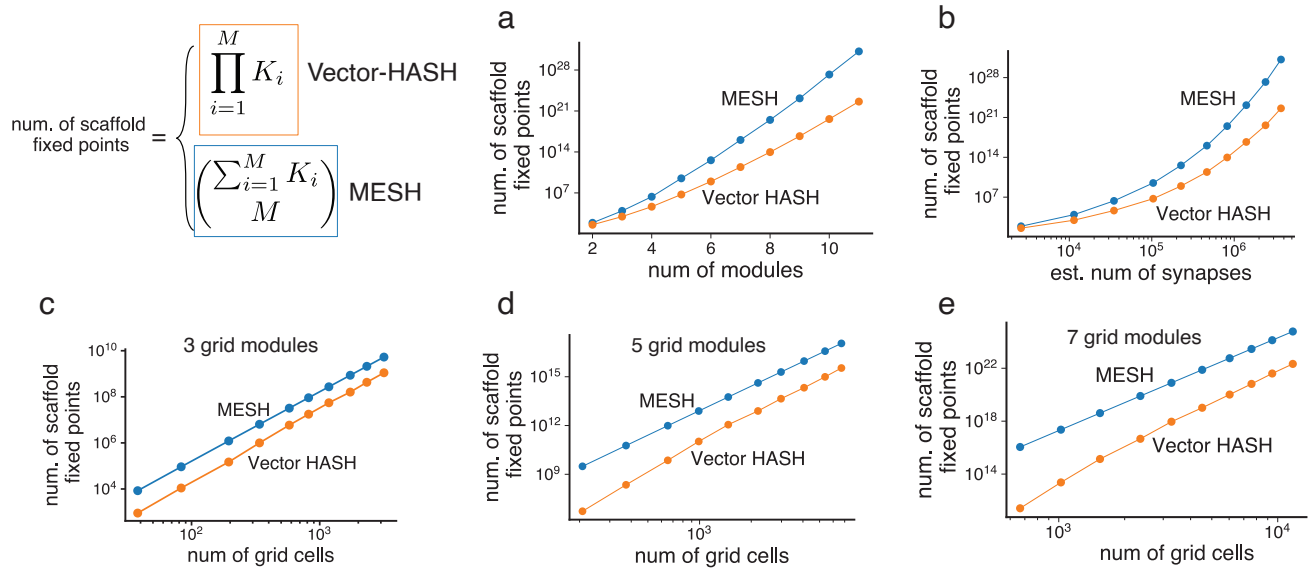

**Figure S1. Theoretical capacity results in Vector-HaSH relative to MESH.** The number of scaffold fixed points increases exponentially in the number of modules (a), and faster than a power law, but slower than exponentially in the number of synapses (b). The number of synapses with increasing number of modules were estimated based on a number of hippocampal cells extrapolated from Fig. 2f. The number of fixed points increases as a power law with the number of grid cells at a fixed number of modules, with the power law exponent increasing with the number of modules.

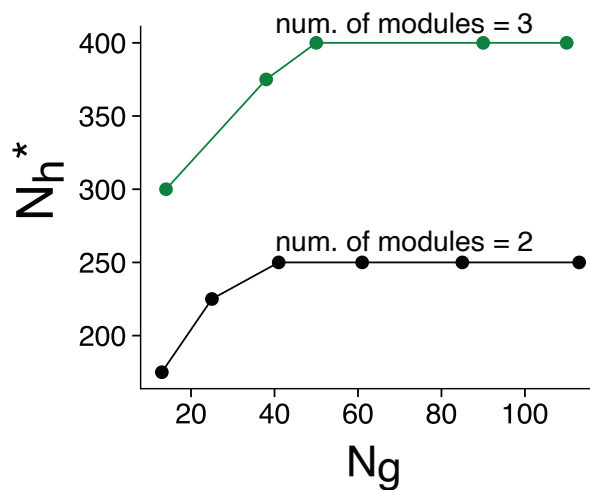

**Figure S2. Critical number of hippocampal cells necessary to support all scaffold fixed points is asymptotically independent of the number of grid cells** For a given number of modules, the critical number of hippocampal cells,  $N_h^*$  increases slowly with the number of grid cells, but then asymptotically approaches a constant, as expected from the theoretical results in Sec. C.1.

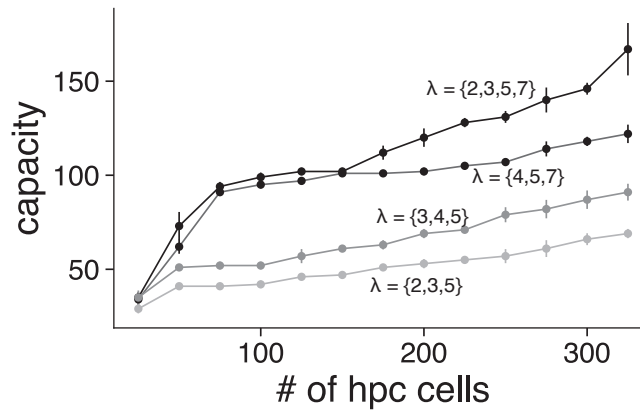

**Figure S3. Scaffold constructed with bi-directional learning between grid states and sparse hippocampal states has low capacity** As seen in Fig. 2f inset, construction of random sparse hippocampal states with bidirectional learning between grid and hippocampal states results in a scaffold that exhibits catastrophic forgetting. We calculate the capacity of the network as the largest number of trained patterns such that all trained patterns are stored as fixed points. Note that this capacity is limited by the number of hippocampal cells, as might be expected from Hopfield like capacity bounds.

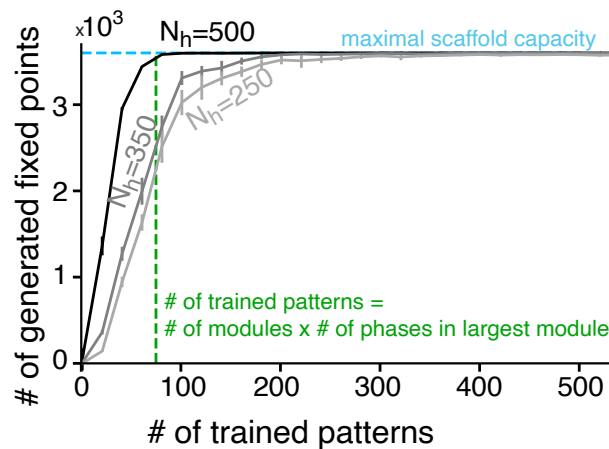

**Figure S4. Learning generalization approaches theoretical expectations with increasing  $N_h$**  The number of generated fixed points approaches the maximal scaffold capacity for a very small number of learned patterns (see also Fig. 2f). As the number of hippocampal cells increases, the number of learning patterns necessary for complete generalization approaches the theoretical expectation of  $M \times K_{max}$ , as proved in SI Sec. C.4.

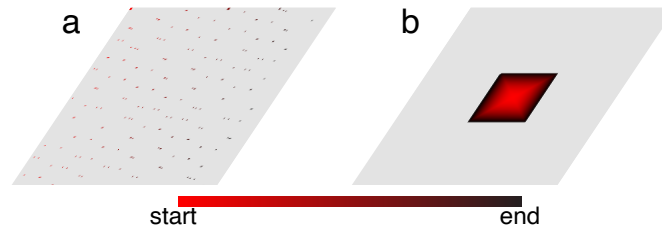

**Figure S5. Minimum learning region for generalization of fixed point dynamics at all grid patterns** As seen in Figs. 2f, S4 all the exponentially many scaffold states are stabilized after learning from only a small number of grid patterns. Here we show visually the minimum learning region that results in complete generalization to all scaffold fixed points. (a) shows the minimal learning region for the fastest possible generalization to all scaffold states (see SI Sec. C.4 for an analytic proof), (b) shows the smallest region needed for a path that spans a two-dimensional contiguous region, generated by a spiraling outward path. Both (a) and (b) are shown corresponding to a scaffold size of 44100, generated with  $\lambda = \{2, 3, 5, 7\}$ . As argued in SI Sec. C.4, the minimum learning area as a fraction for complete generalization approaches zero with increasing scaffold sizes.

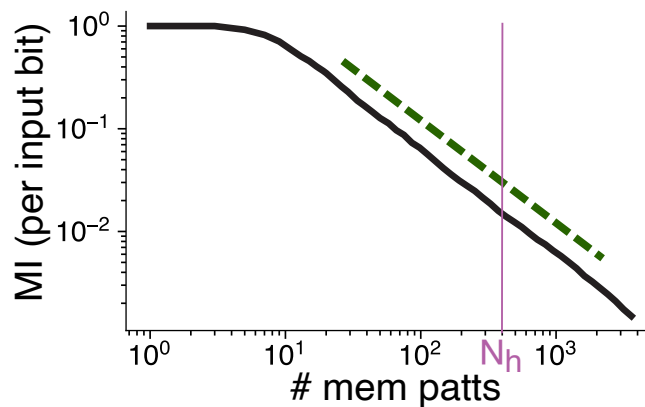

**Figure S6. Hebbian learning between sensory layer and scaffold also produces memory continuum** A memory continuum is obtained in Vector-HaSH even if the weights between the sensory and hippocampal layers are bi-directionally trained using Hebbian learning (instead of pseudoinverse learning, as in Fig. 3. This continuum is also asymptotically proportional to the theoretical bound on memory capacity (forest green dashed line indicative of slope of theoretical upper bound, vertical and horizontal position of dashed line is arbitrary). However, the proportionality constant is lower, with the gradual degradation of information recall occurring well before  $N_h$ . Vector-HaSH parameters identical to Fig. 3c with  $\lambda = \{3, 4, 5\}$ .

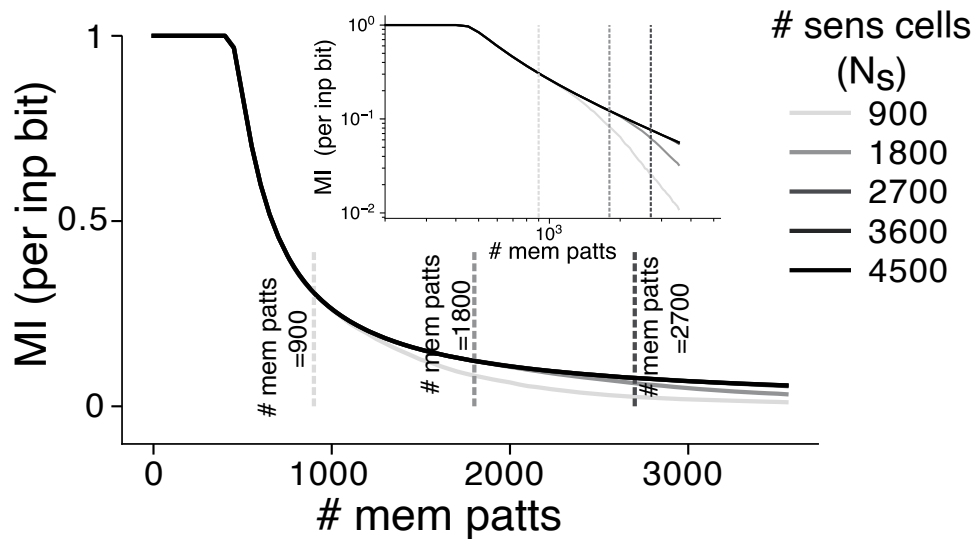

**Figure S7. Effect of varying  $N_s$  on memory continuum** As shown in SI Sec. D.1, the number of sensory cells determines the number of scaffold states that can be exactly recovered through the sensory-to-hippocampal weights. For  $N_s$  less than the total number of scaffold states, the obtained memory continuum is distorted towards the tail for larger than  $N_s$  patterns stored. For all  $N_s$  larger than or equal to the number of scaffold states, the memory continuum is identical, corresponding to the results shown in Fig. 3.

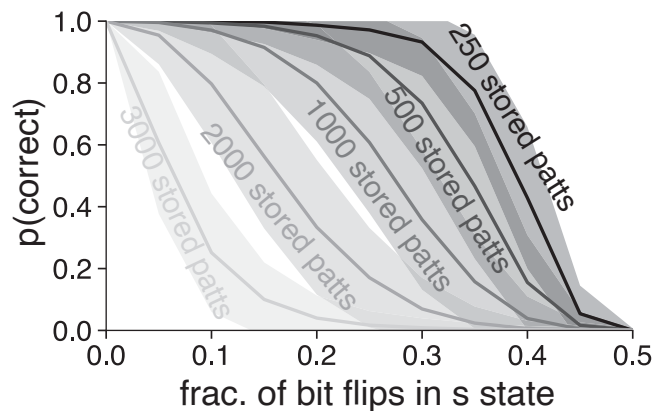

**Figure S8. Basin structure for recovery of sensory hippocampal and grid states varies with number of stored patterns** While the scaffold has a large number of well-structured basins (cf. Fig. 2, SI Sec. C.1), the basins for sensory recovery are additionally governed by the heteroassociative learning between the sensory states and the scaffold. As a result, the basin sizes reduce with increasingly large number of stored patterns, due to overcrowding of the number of stored states within the sensory-to-hippocampal weights. The grid periods were set to  $\lambda = \{3, 4, 5\}$ , with  $N_h = 400$ , resulting in a maximal scaffold capacity of 3600 patterns, with perfect sensory recovery up to 400 patterns. For more than 400 stored patterns,  $p(\text{correct})$  refers to the probability of exact recovery of grid and hippocampal states, and probability of reliable recovery of the sensory state (which is not exact due to being in the memory continuum regime, Fig. 3).

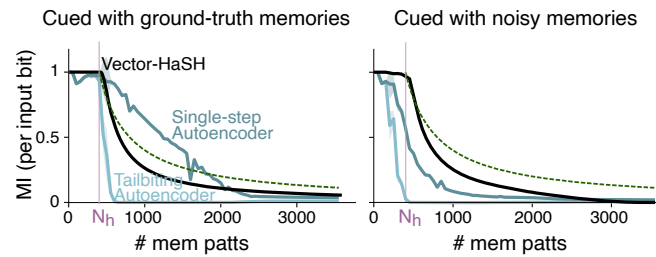

**Figure S9. Vector-HaSH outperforms Autoencoders, particularly when recovering from noisy cues** *Left*

When cued with ground-truth memorized sensory patterns, Vector-HaSH recovers a gradually degraded amount of information per pattern (cf. Fig. 3), unlike the memory cliff shown by tailbiting Autoencoders trained as associative memories<sup>86</sup>. Naively however, it appears that this memory cliff is absent in a single step (i.e., non-tailbiting) of the Autoencoder. However, we see in *Right* that single-step Autoencoders are not associative memories, since they are unable to reconstruct memories from corrupted cues. Here grid periods were set to  $\lambda = \{3, 4, 5\}$ , with  $N_h = 400$ . Stored sensory cues were random binary  $\{-1, 1\}$  patterns, and noisy cues were generated by flipping 10% of bits from a given memorized sensory pattern.

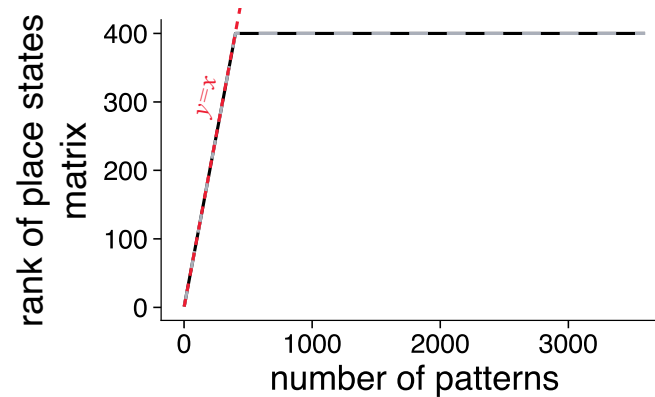

**Figure S10. hippocampal states form a strongly full rank matrix** Rank of the  $N_h \times N_{patts}$  hippocampal states matrix for varying number of patterns  $N_{patts}$  for two different random permutations of the ordering of hippocampal states shown in black and grey. For up to  $N_{patts} \leq N_h$  the rank of the matrix is  $N_{patts}$  (as indicated by the red  $y = x$  line), and is there after  $N_h$  for larger numbers of patterns.



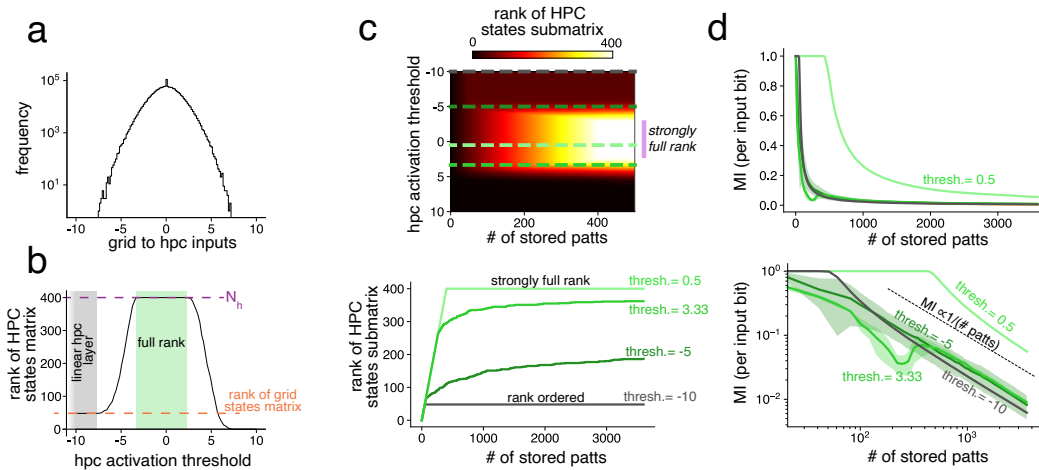

**Figure S11. Activation threshold applied in the hippocampal layer dictates nature of memory continuum** (a) distribution of pre-nonlinearity inputs to the hippocampal layer from grid cells. Any activation threshold above the largest value ( $\sim 7.5$ ) results in zero hippocampal activity, and any threshold below the smallest value ( $\sim -7.5$ ) results in a purely linear hippocampal layer. (b) A linear hippocampal layer (corresponding to thresholds in the grey region) results in a HPC states matrix of rank equal to the rank of the grid cell states matrix (which equals  $N_g - M + 1$  as shown in Ref. <sup>136</sup>), whereas a range of thresholds (shown in green) result in a full rank HPC states matrix. (c) *Top*: The rank of the  $N_h \times N_{patts}$  submatrix of hippocampal states constructed over the first  $N_{patts}$ . Here the hippocampal states have been ordered according to the optimal order that leads to fastest scaffold learning generalization (Sec. C.4). *Bottom*: Rank versus  $N_{patts}$  for the particular values of thresholds considered in panel (d). At a threshold of 0.5 (the value used in almost all simulations in the main text, see *Methods* for more details) we see that the hpc states matrix is strongly full rank. Moreover, as seen in Fig. S10, this matrix is strongly full rank independent of the ordering of the scaffold states. At the lowest threshold value, corresponding to a linear hippocampal layer, the matrix appears to be rank ordered. However, for a linear hippocampal layer the rank ordering of the matrix is dependent on the ordering of the scaffold states, as examined in Fig. S12. (d) Information recovered per input bit as a function of the number of patterns stored in the network (similar to Fig. 3d) for varying threshold values on a linear scale (*top*) and a logarithmic scale (*bottom*). The strongly full rank matrix (identical to the  $\lambda = \{3, 4, 5\}$  curve in Fig. 3d) and the rank ordered matrix both demonstrate perfect recovery up to a knee; all values of thresholds result in a smooth decay of recovered information that is asymptotically proportional to a theoretically expected bound that scales inversely with the number of stored patterns

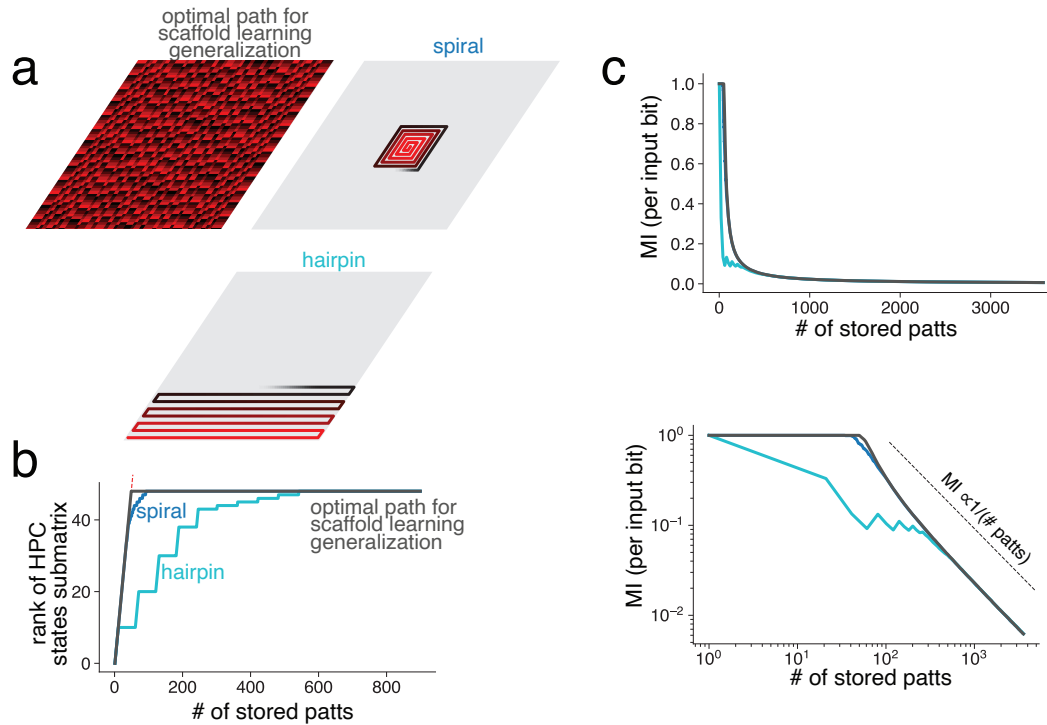

**Figure S12. Linear hippocampal layer generates memory continuum only for specific ordering of scaffold states during learning** (a) Three examples of potential ordering of scaffold states that could be considered: *top left* the discontinuous path that leads to fastest scaffold learning generalization (Sec. C.4) shown for  $\lambda = \{3, 4, 5\}$ ; *top right* a continuous spiral path; *bottom* a continuous ‘hairpin’ path. (b) The hpc states submatrix is rank ordered along the optimal path, and approximately rank ordered for the continuous path. The hairpin path however is significantly deviated from a rank ordered matrix. (c) Information recovered per input bit as a function of the number of patterns stored in the network (similar to Fig. 3d). The rank ordered matrix demonstrates perfect recovery up to a knee at the rank of the grid states matrix; this is also closely approximated by the spiral ordered matrix. A hairpin ordering however results in poor information recovery even at a small number of patterns. In all cases, the asymptotic decay of information is inversely proportional to the number of patterns, as would be expected from theoretical information bounds.

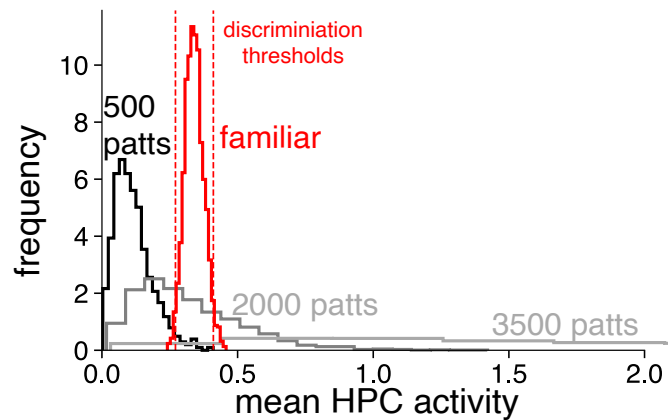

**Figure S13. Mean activity in hippocampal layer can be used for novelty detection** The mean activity in the hippocampal layer for familiar patterns presents a narrow distribution. The mean hippocampal activity for novel patterns is strongly dependent on the number of stored patterns. The narrowness of the familiar pattern distribution allows for discrimination thresholds to be placed on either side (at two standard deviations away from the mean) to result in classification accuracy as shown in Fig. 3i

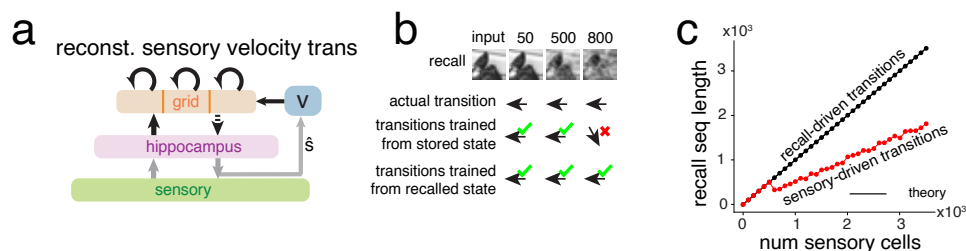

**Figure S14. Sensory driven transitions must be reconstructed from recalled states** (a) Architecture for sensory based reconstruction of next-step transitions for sequence learning, Fig. 6a, bottom. (b) As the number of stored patterns increases, the recalled sensory state gradually degrades; as a result, reconstruction from mapping trained on ground truth sensory states can lead to inaccuracies. (c) More quantitatively, transitions trained on recalled sensory states result in sequence reconstruction of length up to the number of sensory cells (theory in SI Sec. D.6), whereas transitions trained on ground truth sensory states has a lower sequence capacity.

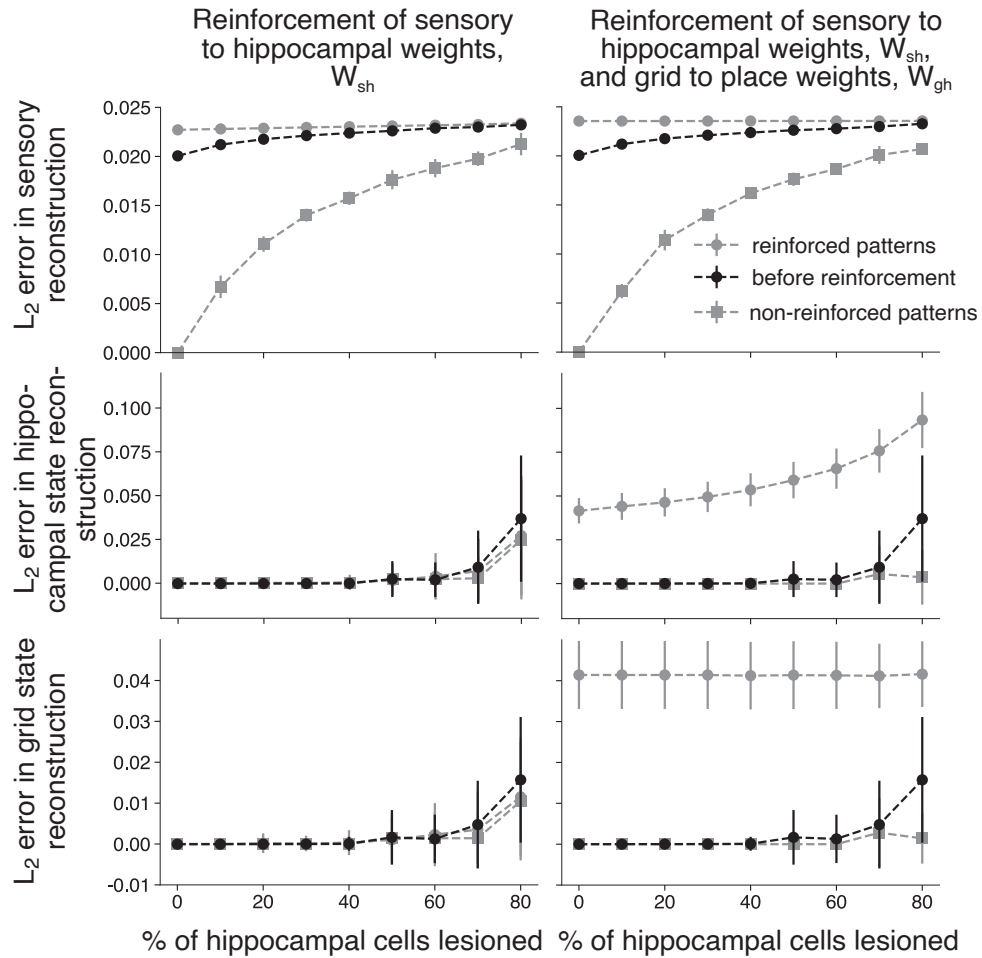

**Figure S15. Reconstruction error in each layer of Vector-HaSH when tested for MTT by reinforcing the model weights for a subset of repeated patterns.** Left: Results when only  $W_{sh}$  weights are reinforced, assuming pre-trained scaffold weights  $W_{gh}$ . Right: Results when all of the learnable weights in Vector-HaSH  $W_{hs}$ ,  $W_{sh}$  and  $W_{gh}$  are reinforced. Note that  $W_{hs}$  reinforcement mathematically doesn't change  $W_{hs}$  as describe in Sec. 1.

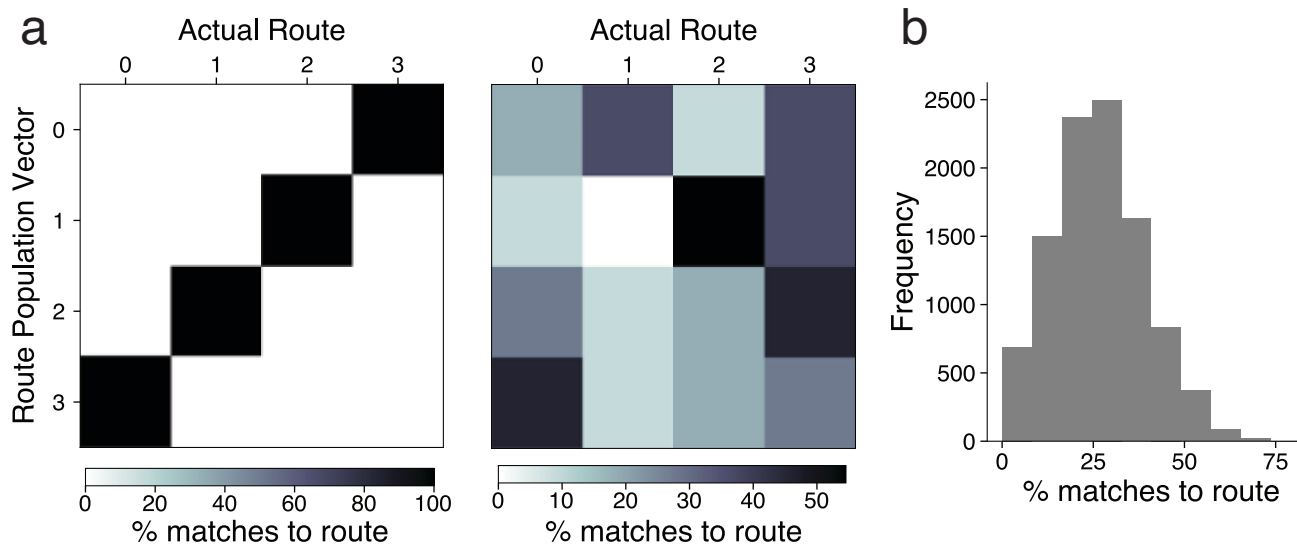

**Figure S16. Analysis method for route encoding results in Fig. 7b.** (a) Left: Trajectory population vectors (PVs) were compared to route-PVs and matched according to highest cosine similarity score. Elements of the matrix show the percentage number of each trajectory matched to each of the four route-PVs. Right: Matches were also made using shuffled data, where each trajectory was randomly assigned to one of the four routes, thus shuffling the route identity of the trajectories. The matrix elements here show the same as *a* except that this data is for one representative shuffle (10000 were conducted in total). (b) Distribution of percentage correct matches for trajectory PV of Route 3 to its route-PV for all 10000 shuffles.

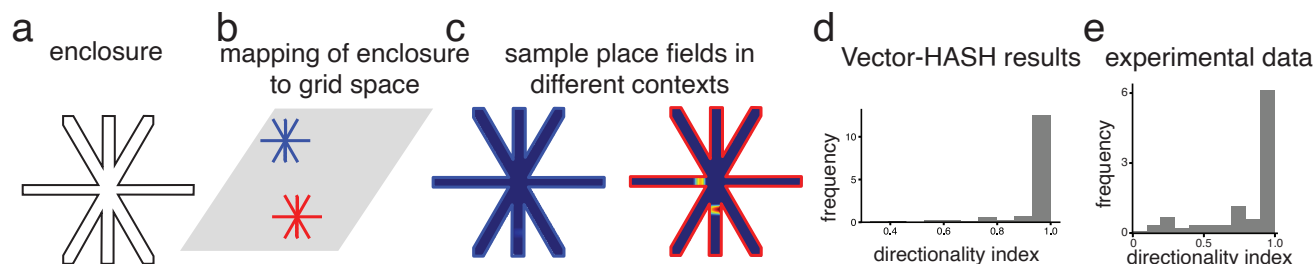

**Figure S17. Vector-HaSH reproduces directional place fields on an 8-arm radial maze.** (a) An 8-arm radial maze apparatus similar to the experiment<sup>113</sup>. (b) Inbound (towards the center) and outbound (away from the center) trajectories on the 8-arm radial maze represented separately in the grid coding space. (c) Fields of a representative hippocampal cell on inbound trajectories (left) and outbound trajectories (right). (d) Directionality index of place cells from Vector-HaSH showing that majority of the cells have directional fields. (e) Directionality index of place cells from the experimental data<sup>113</sup>.



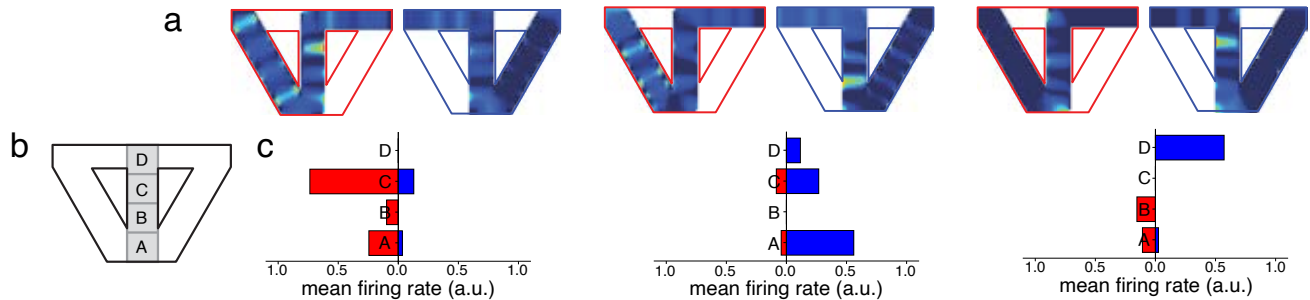

**Figure S18. Splitter cells.** (a) Fields of three representative hippocampal cells on the Right-Turn and Left-Turn trials. (b) The central stem of the continuous alternation task apparatus is divided into 4 equal regions for data analysis following the analysis conducted on the experimental data<sup>110</sup>. (c) Mean activation of the three hippocampal cells shown in (a) computed for each of the four regions defined in (b). The cells show different activity patterns as Vector-HaSH traverses the central stem on Left-Turn and Right-Turn trials.

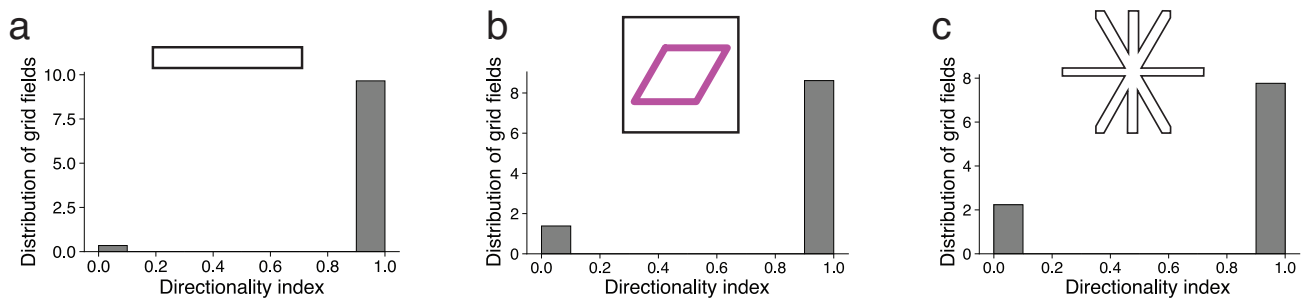

**Figure S19. Vector-HaSH predicts directional grid fields.** Directionality index of grid cells showing that in Vector-HaSH majority of the grid cells have directional fields in one dimensional environments (environment in (a)<sup>112</sup>), and on directed routes in two dimensional environments (environments in b,c<sup>113</sup>).
